# Supplementary material for: Efficacy and safety of high-dose Xueshuantong injection (lyophilised) in reducing the incidence of major adverse cardiovascular events in patients with unstable angina: a protocol of a randomised, parallel-arm, controlled, double-blind and multicentre clinical trial based on dual antiplatelet therapy
Source: PubMed Central journal article supplement — BMJ Open. 2020 Aug 26;10(8):e038074. doi: 10.1136/bmjopen-2020-038074 (PMC7451462; doi:10.1136/bmjopen-2020-038074), 2020-08-26
Supplement: bmjopen-2020-038074.draft_revisions.pdf [file bmjopen-2020-038074.draft_revisions.pdf]

# BMJ Open

BMJ Open is committed to open peer review. As part of this commitment we make the peer review history of every article we publish publicly available.

When an article is published we post the peer reviewers' comments and the authors' responses online. We also post the versions of the paper that were used during peer review. These are the versions that the peer review comments apply to.

The versions of the paper that follow are the versions that were submitted during the peer review process. They are not the versions of record or the final published versions. They should not be cited or distributed as the published version of this manuscript.

BMJ Open is an open access journal and the full, final, typeset and author-corrected version of record of the manuscript is available on our site with no access controls, subscription charges or pay-per-view fees (<http://bmjopen.bmj.com>).

If you have any questions on BMJ Open's open peer review process please email [info.bmjopen@bmj.com](mailto:info.bmjopen@bmj.com)

# BMJ Open

**Efficacy and safety of Xueshuantong injection (lyophilized) in reducing the incidence of major adverse cardiovascular events in patients with unstable angina: A randomized, parallel-arm, controlled, double-blind, and multicenter clinical trial based on dual antiplatelet therapy**

|                               |                                                                                                                                                                                                                                                                                                        |
|-------------------------------|--------------------------------------------------------------------------------------------------------------------------------------------------------------------------------------------------------------------------------------------------------------------------------------------------------|
| Journal:                      | <i>BMJ Open</i>                                                                                                                                                                                                                                                                                        |
| Manuscript ID                 | bmjopen-2020-038074                                                                                                                                                                                                                                                                                    |
| Article Type:                 | Protocol                                                                                                                                                                                                                                                                                               |
| Date Submitted by the Author: | 26-Feb-2020                                                                                                                                                                                                                                                                                            |
| Complete List of Authors:     | Long, Wenjie; Guangzhou University of Traditional Chinese Medicine First Affiliated Hospital,<br>Liao, Huili<br>Huang , Xi<br>Liu, Qingqing<br>Tang, Yaqing<br>Lu, Liming<br>Liu, Jianhong<br>Yuan, Tianhui<br>Ling, Yan<br>Hong, Yu<br>Duan , Jiao<br>Lin , Weiji<br>Xian, Shaoxiang<br>Yang, Zhongqi |
| Keywords:                     | CARDIOLOGY, Adult cardiology < CARDIOLOGY, Coronary heart disease < CARDIOLOGY                                                                                                                                                                                                                         |
|                               |                                                                                                                                                                                                                                                                                                        |

SCHOLARONE™  
Manuscripts

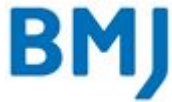

I, the Submitting Author has the right to grant and does grant on behalf of all authors of the Work (as defined in the below author licence), an exclusive licence and/or a non-exclusive licence for contributions from authors who are: i) UK Crown employees; ii) where BMJ has agreed a CC-BY licence shall apply, and/or iii) in accordance with the terms applicable for US Federal Government officers or employees acting as part of their official duties; on a worldwide, perpetual, irrevocable, royalty-free basis to BMJ Publishing Group Ltd ("BMJ") its licensees and where the relevant Journal is co-owned by BMJ to the co-owners of the Journal, to publish the Work in this journal and any other BMJ products and to exploit all rights, as set out in our [licence](#).

The Submitting Author accepts and understands that any supply made under these terms is made by BMJ to the Submitting Author unless you are acting as an employee on behalf of your employer or a postgraduate student of an affiliated institution which is paying any applicable article publishing charge ("APC") for Open Access articles. Where the Submitting Author wishes to make the Work available on an Open Access basis (and intends to pay the relevant APC), the terms of reuse of such Open Access shall be governed by a Creative Commons licence – details of these licences and which [Creative Commons](#) licence will apply to this Work are set out in our licence referred to above.

Other than as permitted in any relevant BMJ Author's Self Archiving Policies, I confirm this Work has not been accepted for publication elsewhere, is not being considered for publication elsewhere and does not duplicate material already published. I confirm all authors consent to publication of this Work and authorise the granting of this licence.

1  
2  
3  
4 **Efficacy and safety of Xueshuantong injection (lyophilized) in reducing the**  
5  
6 **incidence of major adverse cardiovascular events in patients with unstable**  
7  
8 **angina: A randomized, parallel-arm, controlled, double-blind, and multicenter**  
9  
10 **clinical trial based on dual antiplatelet therapy**  
11  
12

13  
14 **Running title:** Efficacy and safety of Xueshuantong injection in patients with UA

15  
16 Wenjie Long PhD<sup>1,3†</sup>, Huili Liao MD<sup>1†</sup>, Xi Huang MD<sup>2†</sup>, Qingqing Liu MD<sup>2</sup>, Yaqing  
17  
18 Tang MD<sup>4</sup>, Liming Lu PhD<sup>5</sup>, Jianhong Liu MD<sup>1</sup>, Tianhui Yuan MD<sup>4</sup>, Yan Ling PhD<sup>1</sup>,  
19  
20 Yu Hong MD<sup>1</sup>, Jiao Duan MD<sup>1</sup>, Weiji Lin MD<sup>1</sup>, Shaoxiang Xi PhD<sup>1,3\*</sup>, Zhongqi  
21  
22 Yang PhD<sup>1,3\*</sup>  
23  
24  
25

26  
27 <sup>1</sup>Department of Geriatrics, The First Affiliated Hospital of Guangzhou University of  
28  
29 Chinese Medicine, No.16 Jichang Road, Baiyun District, Guangzhou, 510405, P.R.  
30  
31 China  
32  
33

34  
35 <sup>2</sup>The First Clinical College, Guangzhou University of Chinese Medicine, No.12  
36  
37 Jichang Road, Baiyun District, Guangzhou, 510405, P.R. China  
38  
39

40  
41 <sup>3</sup>Lingnan Medical Research Center, Guangzhou University of Chinese Medicine,  
42  
43 Jichang road No.12, Guangzhou, Guangdong 510000, China  
44  
45

46  
47 <sup>4</sup>National Drug Clinical Trial Agency Office , The First Affiliated Hospital of  
48  
49 Guangzhou University of Chinese Medicine, No.16 Jichang Road, Baiyun District,  
50  
51 Guangzhou, 510405, P.R. China.  
52

53  
54 <sup>5</sup>Clinical Research Center, South China Research Center for Acupuncture and  
55  
56 Moxibustion, Medical College of Acu-Moxi and Rehabilitation, Guangzhou  
57  
58  
59

1  
2  
3  
4 University of Chinese Medicine, No.232 Waihuan Dong Road, Guangzhou, 510006,  
5  
6 Guangdong, China.

7  
8 †These authors contributed equally to this work.  
9

10  
11  
12  
13  
14 **\*Corresponding Author:**

15  
16 Shaoxiang Xi

17  
18 Department of Geriatrics, The First Affiliated Hospital of Guangzhou University of  
19  
20 Chinese Medicine, No.16 Jichang Road, Baiyun District, Guangzhou, 510405, P.R.  
21  
22 China  
23

24  
25  
26 Lingnan Medical Research Center, Guangzhou University of Chinese Medicine,  
27  
28 Jichang road No.12, Guangzhou, Guangdong 510000, China  
29

30  
31  
32 Tel: +86-13560231626

33  
34  
35 Fax: +86-21-57643271

36  
37  
38 E-mail: Shaoxiangx@hotmail.com

39  
40  
41 Zhongqi Yang

42  
43  
44 E-mail: Yang\_zhongqi@163.com  
45  
46  
47  
48  
49  
50  
51  
52  
53  
54  
55  
56  
57  
58  
59  
60

## Abstract

**Objective:** Unstable angina (UA), referred to as acute coronary syndrome (ACS), causes unexpected chest pain. Xueshuantong injection (lyophilized) (XST) is a traditional Chinese herbal injection having the potential to treat ACS. This clinical trial aims to examine the efficacy and safety of XST.

**Design:** A randomized, parallel-arm, controlled, double-blind, and multicenter clinical trial.

**Setting and Participants:** A total of 1200 participants with UA will be enrolled in a 1:1 ratio, with 600 patients included in the XST treatment group and 600 with one-twentieth dose in the control group.

**Interventions:** All participants will receive the conventional treatment. XST group will be treated via intravenous drip with 500 mg XST diluted with 250–500 mL of 5% glucose injection or sodium chloride injection, once per day for 7–14 days, while the patients in control group will be treated via intravenous drip with 25 mg XST diluted with 250–500 mL of 5% glucose injection or sodium chloride injection.

**Primary and secondary outcome measures:** The primary outcome will include the incidence of composite endpoints for major adverse cardiovascular events(MACE), including cardiovascular death, nonfatal myocardial infarction, and revascularization. The secondary outcomes, the efficacy of angina pectoris will be observed and the myocardial injury markers will be monitored.

**Results:** The efficacy assessment and MACE will be observed, and angina pectoris

1  
2  
3  
4 will be examined at the start and end of the run-in period. All AEs will be recorded,  
5  
6 regardless of severity, to assess the safety of XST. The baseline characteristics of  
7  
8 patients will be summarized and compared using the *t* test or nonparametric statistical  
9  
10 test. Qualitative data will be analyzed using the chi-square or Fisher exact tests,  
11  
12 Cochran–Mantel–Hasenszel (CMH) test, and Wilcoxon test.  
13  
14

15  
16  
17 **Conclusions:** Clinical evidence for the efficacy and safety of XST in reducing the  
18  
19 incidence of MACE in patients with UA.  
20  
21

22 **Trial registration:** This study was registered on the Chinese Clinical Trial Registry  
23  
24 (<http://www.chictr.org.cn/>) with the ID ChiCTR180001591.  
25  
26

27 **Key words:** Acute coronary syndrome, clinical trial, traditional Chinese herbal  
28  
29 injection, unstable angina  
30  
31  
32  
33  
34  
35  
36  
37  
38  
39  
40  
41  
42  
43  
44  
45  
46  
47  
48  
49  
50  
51  
52  
53  
54  
55  
56  
57  
58  
59  
60

### Strengths and limitations of this study

- This is a randomized, double-blind, placebo-controlled and multicenter trial to assess the efficacy and safety of Xuanshuantong injection(lyophilized) in patients with unstable angina
- A multicenter trial is carried out in 17 medical centers across China, which can improve the external validity and representativeness of the sample and reduce the risk of selection bias.
- A long-term follow-up (1, 3, and 6 months) will be conducted after the supervised intervention.
- The treatment period of 7-14 days may be a bit short.



## 1.Introduction

Unstable angina (UA), referred to as acute coronary syndrome (ACS), causes unexpected chest pain. Reduced blood flow to the heart muscle is the most common cause of UA because the coronary arteries are narrowed by atherosclerosis, leading to the rupture of coronary blood vessels and hence blood clotting, which blocks the flow of blood to the heart muscle. The risk factors for UA include diabetes, obesity, family history of heart disease, high blood pressure, high low-density lipoprotein cholesterol, low high-density lipoprotein cholesterol, male sex, and use of any form of tobacco<sup>1, 2</sup>. With the wide application of percutaneous coronary intervention (PCI) in patients with ACS, current guidelines recommend potent platelet inhibition with prasugrel or ticagrelor for 12 months after ACS management with PCI. However, the greatest anti-ischemic benefit of potent antiplatelet drugs over the less-potent clopidogrel occurs early, while most excess bleeding events occur during chronic treatment. It is related to the efforts of physicians to reduce the adverse incidence of cardiovascular events, promote the patient's early recovery, and improve their health-related quality of life.

Xueshuantong injection (lyophilized) (XST) is a traditional Chinese herbal injection comprising a series of saponins extracted from *Panax notoginseng*. It has been approved by the China Food and Drug Administration (China drug approval number: Z 20025652) and collected according to the "2012 national essential drugs list" and People's Republic of China Pharmacopoeia, respectively. It has been

1  
2  
3  
4 reported to have anti-inflammatory effects that correct endothelial dysfunction *in*  
5  
6 *vivo*<sup>3</sup> and *in vitro*<sup>4</sup>. Clinically, as a common medicine in China's Grade-A Tertiary  
7  
8 Hospital, XST has been reported to be beneficial in treating ACS<sup>5, 6</sup>. In preliminary  
9  
10 studies, including small samples, XST reduced the incidence of major adverse  
11  
12 cardiovascular events (MACE). The high-quality trials and evidence are needed to  
13  
14 prove the efficacy of XST. This randomized, parallel, controlled, double-blind, and  
15  
16 multicenter clinical trial aims to examine the efficacy and safety of XST in patients  
17  
18 with UA. The results of this trial may provide clinical evidence for treating patients  
19  
20 with UA.  
21  
22  
23  
24  
25  
26  
27  
28  
29

## 30 **2. Method and design**

### 31 **2.1 Study design**

32  
33  
34  
35 This randomized, parallel-arm, controlled, double-blind, and multicenter clinical  
36  
37 trial will be conducted in 17 medical centers in China: The First Affiliated Hospital of  
38  
39 Guangzhou University of Chinese Medicine, The First Affiliated Hospital of the  
40  
41 Henan University of Chinese Medicine, Luoyang No. 1 Hospital of Traditional  
42  
43 Chinese Medicine, Shanxi Fenyang Hospital, The First Affiliated Hospital of Henan  
44  
45 University of Science and Technology, Zhengzhou People's Hospital, Zhengzhou  
46  
47 Central Hospital, Ruikang Hospital Affiliated to Guangxi University of Traditional  
48  
49 Chinese Medicine, Nanjing Hospital of Chinese Medicine, Shuguang Hospital  
50  
51 Affiliated to Shanghai University of Chinese Medicine, Changsha Fourth Hospital,  
52  
53  
54  
55  
56  
57  
58  
59  
60

1  
2  
3  
4 The First Affiliated Hospital of Hunan University of Traditional Chinese Medicine,  
5  
6 The Second Affiliated Hospital of Heilongjiang University of Traditional Chinese  
7  
8  
9 Medicine, The Second Affiliated Hospital of Tianjin University of Traditional  
10  
11 Chinese Medicine, Affiliated Hospital of Tianjin Academy of Chinese Medicine,  
12  
13 Tianjin Beichen District Hospital of Traditional Chinese Medicine, and Wenzhou  
14  
15 Hospital of Traditional Chinese Medicine. A total of 1200 patients with UA who met  
16  
17 the selection will be enrolled in a 1:1 ratio, with 600 patients included in the XST  
18  
19 treatment group and 600 with 1/20th dose in the control group.  
20  
21  
22  
23

24 All the visits will be recorded in electronic care report forms through the  
25  
26 Electronic Data Capture system, which is accessed online via the Internet for data  
27  
28 collection and management. The protocol of this study was developed in accordance  
29  
30 with the standard protocol project: Interventional Trial Recommendations guidelines<sup>7</sup>.  
31  
32  
33  
34  
35  
36  
37

## 38 **2.2 Ethics**

39  
40 This study has been approved by the ethics committee of the First Affiliated  
41  
42 Hospital of Guangzhou University of Chinese Medicine (approval number:  
43  
44 ZYYEC[2017]002) and registered on the Chinese Clinical Trial Registry with the ID  
45  
46 ChiCTR1800015911.  
47  
48  
49  
50  
51  
52

## 53 **2.3 Study population**

54  
55 Patients will be included after written informed consent and enrolled in the study  
56  
57 when the inclusion and exclusion criteria are met (Table 1).  
58  
59  
60

### 2.3.3 Withdrawal criteria

1. Patients with some comorbidities, complications, or special physiological changes during the trial
2. Patients with poor compliance in the trial; the use of the drug not reaching 80% (except for those recovered in advance) or exceeding 120% of the prescribed amount
3. Patients with blindness or emergency unblinding during the trial
4. Patients with serious adverse events and those not appropriate to continue the test
5. Patients failing to use the test drug
6. Patients misdiagnosed or not matching the inclusion criteria and accidentally included
7. Patients with no follow-up records
8. Patients failing to comply with the treatment during the trial, changing the medicines, or adding nonspecified therapeutic medications by themselves, especially those medications that may affect the evaluation of the test drug, affecting the validity and safety.

### 2.4 Study setting and recruitment

Between December 2018 and December 2020, 1200 patients will be recruited at the 17 centers mentioned earlier through the official website of the hospitals, posters, and networks. The physicians will diagnose the participants, and the research assistants will manage the recruitment.

## 2.5 Randomization

After the recruitment is completed, statistical analysis system software will be used to generate the random arrangement of 1200 people in 2 groups (XST and placebo groups) with the method of central stratified regional group randomization. The randomization numbers will be kept in opaque sealed envelopes. The physicians and patients will not be aware of the grouping and intervention.

## 2.6 Blinding

This study has a double-blind design, with a very low dose used as control. The number of cases in the study and control groups will be in the ratio of 1:1. The blinding work will be completed by statisticians. To ensure the blinding of investigators and participants to study treatment, the study drug or placebo will be provided in identical packaging and labeling. Due to some natural variability in the color of the study drug, which is batch dependent, the color of the placebo will be matched to be the same as the average color of the study drug. Study drug and placebo will be labeled with a unique label letter that will be used to assign treatment to the patient but will not indicate treatment allocation to investigators or participants. No member of the study team and their extended staff, except for pharmacists and biostatisticians, will have access to the randomization scheme during the conduct of the study. In the event of a medical emergency, where breaking the blind is required

1  
2  
3  
4 to provide medical care to the participant, the investigator will obtain the treatment  
5  
6 assignment from the trial pharmacists.  
7  
8  
9

## 10 11 12 **2.7 Sample size calculation**

13  
14 MACE will be used as the effect index according to the statistical requirements of  
15  
16 the optimal validity test design.  
17

18  
19 Based on the expert advice combined with clinical practical considerations and  
20  
21 according to the loss rate of less than 20% estimated beforehand, the study sample  
22  
23 was 1200 cases (600 cases in each group), assuming that the incidence of MACE was  
24  
25 12% after dual antiplatelet therapy for 6 months, which was reduced by 6% after  
26  
27 lyophilization (alpha = 0.05; power = 0.9).  
28  
29  
30  
31  
32  
33  
34

## 35 **2.8 Interventions**

36  
37 All participants will receive dual antiplatelet therapy (aspirin 100 mg/d +  
38  
39 clopidogrel 75 mg/d) and anticoagulation therapy (unfractionated heparin) according  
40  
41 to the 2014 American College of Cardiology/American Heart Association Guidelines  
42  
43 for the Diagnosis and Treatment of Non-ST-Segment Acute Coronary Syndrome, and  
44  
45 in accordance with the guidelines to accept statins, angiotensin-converting enzyme  
46  
47 inhibitors, beta-blockers, and nitrates. Patients with mild UA will undergo a  
48  
49 standardized baseline assessment before the treatment, including detailed medical  
50  
51 history, physical examination, and laboratory testing. Meanwhile, the following  
52  
53  
54  
55  
56  
57  
58  
59  
60

1  
2  
3  
4 treatments will be given to different groups:  
5

6 (1) XST treatment group: The patients will be treated via an intravenous drip with  
7  
8 500 mg XST (lyophilized) diluted with 250–500 mL of 5% glucose injection or  
9  
10 sodium chloride injection, once per day for 7–14 days.  
11  
12

13  
14 (2) Control group: The patients will be treated via an intravenous drip with 25 mg  
15  
16 XST (lyophilized) diluted with 250–500 mL of 5% glucose injection or sodium  
17  
18 chloride injection, once per day for 7–14 days.  
19  
20

21  
22 The experimental drugs will be distributed by a drug administrator and injected  
23  
24 by trained nurses.  
25  
26

27 Patients who continue to use the drug for more than 7 days until discharge will  
28  
29 end the medication and move directly to the follow-up period. The efficacy and safety  
30  
31 of XST will be assessed after treatment for 7–14 days and follow-up for 1, 3, and 6  
32  
33 months (Figs. 1 and Table 2).  
34  
35  
36  
37  
38  
39

## 40 **2.7 Outcome measurements**

### 41 **2.7.1 Primary outcomes**

42  
43 The primary endpoints will include the incidence of composite endpoints for  
44  
45 MACE, including cardiovascular death, nonfatal myocardial infarction, and  
46  
47 revascularization.  
48  
49  
50  
51

52  
53 The primary endpoint is the time from the enrollment to the end of the study  
54  
55 (including the medication observation period and follow-up period) when any of the  
56  
57  
58  
59  
60

1  
2  
3  
4 MACE events occur for the first time. Patients without MACE during the study will  
5  
6 be defined as censored at the end of the study. For patients who quit the trial early due  
7  
8 to reasons other than MACE, the time of occurrence is defined as censoring at the  
9  
10 time of early termination. Deaths not due to cardiovascular diseases or that occur after  
11  
12 the MACE will not be evaluated.  
13  
14  
15  
16  
17  
18

### 19 **2.7.2 Secondary outcomes**

20  
21  
22 The efficacy of angina pectoris will be observed at the time of enrollment and at  
23  
24 the end of treatment.  
25  
26

27 Myocardial injury markers [serum creatine kinase MB; cardiac troponin T/cardiac  
28  
29 troponin I (cTnI)/high-sensitivity troponin I] will be monitored.  
30  
31  
32  
33  
34

### 35 **2.7.3 Safety assessment**

36  
37 The observation of vital signs; testing of blood and urine samples, renal function, and  
38  
39 liver function; electrocardiograms; and physical examinations will be examined at the  
40  
41 start and end of the run-in period. The researchers will record the abnormal changes at  
42  
43 any time. An adverse event (AE) is any adverse medical event that occurs during the  
44  
45 trial. Patients will be required to report all AEs at each visit. All AEs will be recorded,  
46  
47 regardless of severity, to assess the safety of XST.  
48  
49  
50  
51

52  
53 If an AE occurs, the researchers will have to determine whether to stop the  
54  
55 observation and proceed with the diagnosis and corresponding treatment. If any  
56  
57  
58  
59  
60



1  
2  
3  
4 severe AE occurs, the researchers must take immediate action to ensure the safety of  
5  
6 the participants. They must also report to the ethics committee within 24 h. The  
7  
8 responsible staff from The First Affiliated Hospital of Guangzhou University of  
9  
10 Chinese Medicine must promptly notify other participating centers and initiate any  
11  
12 necessary legal procedures.  
13  
14  
15  
16  
17  
18

## 19 **2.8 Follow-up**

20  
21  
22 All included participants will be evaluated for the occurrence of MACE after 1, 3,  
23  
24 and 6 months through phone calls after the end of the medication. The trial will be  
25  
26 ended if the following endpoints occur: death, nonfatal myocardial infarction, or  
27  
28 revascularization (including PCI and CABG). The academic research on hemorrhage  
29  
30 in Europe and the United States proposed a unified definition of hemorrhage type 3–  
31  
32 5.  
33  
34  
35  
36  
37

38 The occurrence of the MACE must be recorded in an original supporting  
39  
40 document, including but not limited to a copy of the discharge summary, a copy of the  
41  
42 medical record, or other documents that can be used to verify the occurrence of the  
43  
44 MACE and the date of its occurrence.  
45  
46  
47  
48  
49

## 50 **2.9 Statistical analysis**

### 51 ***2.9.1 Enrollment and case completion***

52  
53  
54  
55  
56 The completion of the trial at each center must be recorded and described. All  
57  
58  
59  
60

1  
2  
3  
4 cases of shedding must be listed.  
5

### 6 **2.9.2 Baseline comparability analysis**

7  
8  
9 The baseline characteristics of patients will be summarized and compared using  
10  
11 the  $t$  test or nonparametric statistical test. Qualitative data will be analyzed using the  
12  
13 chi-square or Fisher exact tests, Cochran–Mantel–Hasenszel (CMH) test, and  
14  
15 Wilcoxon test.  
16  
17

### 18 **2.9.3 Analysis of efficacy**

19  
20 (1) Baseline comparability analysis: This includes the description of demographic  
21  
22 data, symptoms, and general conditions. The  $t$  test or nonparametric statistical method  
23  
24 will be used for quantitative data. Qualitative data will be determined using the  
25  
26 chi-square test, Fisher's exact probability method, CMH test, and Wilcoxon rank-sum  
27  
28 test.  
29  
30  
31  
32  
33

34  
35 (2) Primary and secondary outcomes: The incidence of composite endpoints for  
36  
37 MACE and the efficacy of angina pectoris will be compared between the two groups  
38  
39 and analyzed using the chi-square or Fisher exact tests and two-sample  $t$  tests or  
40  
41 Wilcoxon rank-sum test. The laboratory data on myocardial injury markers will be  
42  
43 analyzed for the changes before and after the intervention. The average value of each  
44  
45 laboratory data after the treatment will be compared.  
46  
47  
48  
49

50 (3) For cases of rejection and shedding, statistical descriptions will be performed  
51  
52 one by one. Adverse reactions will be statistically described. The incidence of adverse  
53  
54 reactions will be compared using the chi-square or Fisher exact tests.  
55  
56  
57  
58  
59  
60

### 3. Discussion

XST is a traditional Chinese herbal injection consisting of a series of saponins extracted from *Panax notoginseng*. It has been approved by the China Food and Drug Administration (China drug approval number: Z 20025652) and collected according to the “2012 national essential drugs list” and the People’s Republic of China Pharmacopoeia, respectively. Total saponins, isolated from the root and rhizome of *P. notoginseng*, are the main components of XST.

*P. notoginseng* is known for promoting blood circulation, preventing thrombosis, and dilating blood vessels. It is widely applied to treat acute cerebral infarction, stroke, and coronary heart disease in clinical practice<sup>8, 9</sup>. Gan et al.<sup>10</sup> evaluated the efficacy and safety of the *P. notoginseng* extract via intracoronary injection for treating the post-PCI slow-reflow phenomenon in patients with ST-segment elevation myocardial infarction and its impact on patients' prognosis. They found that coronary injection with tirofiban and XST was more effective in improving the coronary blood flow and showed no increase in the incidence of hemorrhagic complications compared with the injection with tirofiban only. *P. notoginseng* has been found to be beneficial to patients with UA. The use of the extract has been recommended for patients with UA in clinical practice as a complementary and alternative therapy<sup>11</sup>. However, more randomized controlled trials with reliable designs, large samples, and long-term observations are needed for further evaluations.

1  
2  
3  
4 The meta-analysis of XST injection combined with routine basic treatment was  
5  
6 superior to routine basic treatment alone in alleviating clinical symptoms, with  
7  
8 statistically significant differences between the groups. XST injection combined with  
9  
10 routine basic treatment could alleviate UA pectoris. However, due to the low quality  
11  
12 of included studies, further well-designed, multicenter, and large-scale RCTs are still  
13  
14 needed to evaluate the efficacy of XST injection [14]. Moreover, the total revenue from  
15  
16 XST in the Chinese market in 2013 was over \$700 million [15]. Therefore, the  
17  
18 enormous consumption requires stricter and accurate evidence on its safety. However,  
19  
20 many reports of XST were case reports, and hence large-sample and high-level  
21  
22 evidence for the efficacy and safety of XST is still lacking. Therefore, this study will  
23  
24 be conducted to investigate the efficacy and safety of XST in reducing the incidence  
25  
26 of MACE in patients with UA. The findings of this study will provide clinical  
27  
28 evidence for the use of XST in reducing the incidence of MACE in patients with UA.  
29  
30  
31  
32  
33  
34  
35  
36  
37  
38  
39

#### 40 **Acknowledgments**

41  
42 The authors are grateful to Professor Licheng Zhao from Guangzhou University of  
43  
44 Chinese Medicine for his guidance during this study. They also thank Miss Jingyi Xu,  
45  
46 who carefully checked the references.  
47  
48  
49  
50

#### 51 **Funding**

52  
53 This study has been supported by the project “Efficacy and safety of Xueshuantong  
54  
55  
56  
57  
58  
59  
60

1  
2  
3  
4 injection (lyophilized) in reducing the incidence of MACE in patients with unstable  
5  
6 angina: A randomized, parallel-arm, controlled, double-blind, and multicenter clinical  
7  
8 trial based on dual antiplatelet therapy” (no. 10600216) and the second batch of  
9  
10 national TCM clinical research base project (no. 2018131).  
11  
12  
13

#### 14 **Trial status**

15  
16  
17 Currently the participants are being enrolled for the trial.

#### 18 **Conflicts of interest**

19  
20  
21 All authors declare no any conflicts of interest.  
22

#### 23 **Author contribution**

24  
25  
26  
27  
28  
29  
30  
31  
32  
33  
34  
35  
36  
37  
38  
39  
40  
41  
42  
43  
44  
45  
46  
47  
48  
49  
50  
51  
52  
53  
54  
55  
56  
57  
58  
59  
60  
XSX, LHL and YZQ carried out the studies, LJH, DJ, HY and LY participated in  
collecting data, and drafted the manuscript. LWJ, LLM and LQQ performed the  
statistical analysis and participated in its design. TYQ, YTH, HX and LWJ  
participated in acquisition, analysis, or interpretation of data and draft the manuscript.

All authors read and approved the final manuscript.

#### 38 **Patient Consent Form**

40  
41  
42  
43  
44  
45  
46  
47  
48  
49  
50  
51  
52  
53  
54  
55  
56  
57  
58  
59  
60  
All participants provided written informed consent.

#### 43 **Data Sharing Statement**

45  
46  
47  
48  
49  
50  
51  
52  
53  
54  
55  
56  
57  
58  
59  
60  
The datasets used and/or analysed during the current study are available from the  
corresponding author on reasonable request.

## References

1. Ueda P, Gulayin P, Danaei G. Long-term moderately elevated LDL-cholesterol and blood pressure and risk of coronary heart disease. *PLoS One* 2018;**13**(7):e0200017. doi.10.1371/journal.pone.0200017
2. Kannel WB, Feinleib M. Natural history of angina pectoris in the Framingham study. Prognosis and survival. *Am J Cardiol* 1972;**29**(2):154-63. doi.10.1016/0002-9149(72)90624-8
3. Wan JB, Lee SM, Wang JD, *et al.* Panax notoginseng reduces atherosclerotic lesions in ApoE-deficient mice and inhibits TNF-alpha-induced endothelial adhesion molecule expression and monocyte adhesion. *J Agric Food Chem* 2009;**57**(15):6692-7. doi.10.1021/jf900529w
4. Wang N, Wan JB, Chan SW, *et al.* Comparative study on saponin fractions from Panax notoginseng inhibiting inflammation-induced endothelial adhesion molecule expression and monocyte adhesion. *Chin Med* 2011;**6**:37. doi.10.1186/1749-8546-6-37
5. Gong X, Shen JH, Wu GP. Effect of Xueshuantong injection on cerebral infarction. *Hainan Yixueyuan Xuebao* 2009;**15**(6):603-4.
6. Fu XX, Xiao WJ, Lu J, *et al.* Retrospective analysis of thrombolysis therapy for 64 cases of acute myocardial infarction with elevated ST segment. *Chin J Integr Med* 2009;**15**(6):462-5. doi.10.1007/s11655-009-0462-8
7. Chan AW, Tetzlaff JM, Gotzsche PC, *et al.* SPIRIT 2013 explanation and

1  
2  
3  
4 elaboration: guidance for protocols of clinical trials. *Bmj* 2013;**346**:e7586.

5  
6  
7 doi.10.1136/bmj.e7586

- 8  
9 8. Yang X, Xiong X, Wang H, *et al.* Protective effects of panax notoginseng  
10 saponins on cardiovascular diseases: a comprehensive overview of experimental  
11 studies. *Evid Based Complement Alternat Med* 2014;**2014**:204840.  
12  
13 doi.10.1155/2014/204840  
14  
15 9. Gui Q, Yang Y, Ying S, *et al.* Xueshuantong improves cerebral blood perfusion  
16 in elderly patients with lacunar infarction. *Neural Regen Res* 2013;**8**(9):792-801.  
17  
18 doi.10.3969/j.issn.1673-5374.2013.09.003  
19  
20  
21 10. Gan LJ, Zhang CH, Zhang M. [Effect of intracoronary injection with xuesaitong  
22 in treating post-PCI slow-reflow phenomenon in patients with ST-segment  
23 elevation myocardial infarction]. *Zhongguo Zhong Xi Yi Jie He Za Zhi*  
24  
25 2010;**30**(4):348-51.  
26  
27  
28  
29  
30  
31  
32  
33  
34  
35  
36  
37  
38 11. Song H, Wang P, Liu J, *et al.* Panax notoginseng Preparations for Unstable  
39 Angina Pectoris: A Systematic Review and Meta-Analysis. *Phytother Res*  
40  
41 2017;**31**(8):1162-72. doi.10.1002/ptr.5848  
42  
43  
44  
45  
46  
47  
48  
49  
50  
51  
52  
53  
54  
55  
56  
57  
58  
59  
60

1  
2  
3  
4 **Figure legends**  
5

6 Figure 1. Flowchart of the study procedure.  
7  
8  
9  
10  
11  
12  
13  
14  
15  
16  
17  
18  
19  
20  
21  
22  
23  
24  
25  
26  
27  
28  
29  
30  
31  
32  
33  
34  
35  
36  
37  
38  
39  
40  
41  
42  
43  
44  
45  
46  
47  
48  
49  
50  
51  
52  
53  
54  
55  
56  
57  
58  
59  
60

For peer review only



Table 1. Inclusion and exclusion criteria

| Inclusion criteria                                                                                                                                                                                                                                                                                                                                                                                                                                                                                                                                                                                                                                                                | Exclusion criteria                                                                                                                                                                                                                                                                                                                                                                                                                                                                                                                                                                                                                                                                                                                                                                                                                    |
|-----------------------------------------------------------------------------------------------------------------------------------------------------------------------------------------------------------------------------------------------------------------------------------------------------------------------------------------------------------------------------------------------------------------------------------------------------------------------------------------------------------------------------------------------------------------------------------------------------------------------------------------------------------------------------------|---------------------------------------------------------------------------------------------------------------------------------------------------------------------------------------------------------------------------------------------------------------------------------------------------------------------------------------------------------------------------------------------------------------------------------------------------------------------------------------------------------------------------------------------------------------------------------------------------------------------------------------------------------------------------------------------------------------------------------------------------------------------------------------------------------------------------------------|
| <ul style="list-style-type: none"> <li>● Patients diagnosed with coronary heart disease who met at least one of the following diagnostic criteria<sup>[1]</sup>:               <ul style="list-style-type: none"> <li>(1) a clear history of myocardial infarction (MI);</li> <li>(2) prior coronary revascularization;</li> <li>(3) coronary angiography or coronary angiography suggesting at least one coronary artery stenosis with catheter stenosis <math>\geq 50\%</math>;</li> <li>(4) cardiac magnetic resonance imaging or radionuclide myocardial perfusion imaging to confirm myocardial ischemia in the patient having coronary heart disease</li> </ul> </li> </ul> | <ul style="list-style-type: none"> <li>◆ Patients with cardiac function class IV (New York Heart Association cardiac function grading); or patients at a high risk of UA short-term risk stratification</li> </ul>                                                                                                                                                                                                                                                                                                                                                                                                                                                                                                                                                                                                                    |
| <ul style="list-style-type: none"> <li>● Patients complying with the diagnosis of UA and having at least one of the following conditions:               <ul style="list-style-type: none"> <li>(1) electrocardiograph with a transient or persistent ST-segment depression of 0.1 mV and even more on one or more leads;</li> <li>(2) Thrombolysis In Myocardial</li> </ul> </li> </ul>                                                                                                                                                                                                                                                                                           | <ul style="list-style-type: none"> <li>◆ Patients with uncontrolled grade III hypertension having systolic blood pressure <math>\geq 180</math> mm Hg and/or diastolic blood pressure <math>\geq 110</math> mm Hg; severe cardiopulmonary insufficiency; severe arrhythmia; severe primary diseases of the liver, kidney, and hematopoietic system; or serious diseases (such as tumors) and mental diseases</li> <li>◆ Patients also having other clinical conditions that might increase the risk of bleeding, such as a history of important organ bleeding in the last 6 months (such as intracerebral hemorrhage and upper gastrointestinal bleeding), decreased platelet count, abnormal coagulation function, and recent active bleeding</li> <li>◆ Patients with abnormal function indexes of the liver and kidney</li> </ul> |

---

|                                                                                                                                                                                                                                                                                                                                                                                                                               |                                                                                                                                                                                                                                                                                                                                                                                                                          |                                                                                                                                                                                                                                                                                                                                                                                                                                                                                                                                                                                                                                                                                                                                                                                                                                                                                                                                                                                                                                                                           |
|-------------------------------------------------------------------------------------------------------------------------------------------------------------------------------------------------------------------------------------------------------------------------------------------------------------------------------------------------------------------------------------------------------------------------------|--------------------------------------------------------------------------------------------------------------------------------------------------------------------------------------------------------------------------------------------------------------------------------------------------------------------------------------------------------------------------------------------------------------------------|---------------------------------------------------------------------------------------------------------------------------------------------------------------------------------------------------------------------------------------------------------------------------------------------------------------------------------------------------------------------------------------------------------------------------------------------------------------------------------------------------------------------------------------------------------------------------------------------------------------------------------------------------------------------------------------------------------------------------------------------------------------------------------------------------------------------------------------------------------------------------------------------------------------------------------------------------------------------------------------------------------------------------------------------------------------------------|
| <p>1<br/>2<br/>3<br/>4<br/>5<br/>6<br/>7<br/>8<br/>9<br/>10<br/>11<br/>12<br/>13<br/>14<br/>15<br/>16<br/>17<br/>18<br/>19<br/>20<br/>21<br/>22<br/>23<br/>24<br/>25<br/>26<br/>27<br/>28<br/>29<br/>30<br/>31<br/>32<br/>33<br/>34<br/>35<br/>36<br/>37<br/>38<br/>39<br/>40<br/>41<br/>42<br/>43<br/>44<br/>45<br/>46<br/>47<br/>48<br/>49<br/>50<br/>51<br/>52<br/>53<br/>54<br/>55<br/>56<br/>57<br/>58<br/>59<br/>60</p> | <p>Infarction (TIMI) risk score<sup>[9]</sup> <math>\geq 3</math></p> <ul style="list-style-type: none"> <li>● Patients receiving dual antiplatelet therapy (aspirin + clopidogrel)</li> <li>● Patients aged 40–75 years, irrespective of sex</li> <li>● Patients willing to accept the drug treatment and provide written informed consent, conforming to the relevant regulations of Good Clinical Practice</li> </ul> | <p>[blood alanine aminotransferase (ALT) and aspartate aminotransferase (AST) level more than two times the upper normal reference range; glomerular filtration rate (GFR) <math>&lt;60 \text{ mL}/(\text{min} \times 1.73 \text{ m}^2)</math>]. Simplified Modification of Diet in Renal Disease formula<sup>[4]</sup>: <math>\text{GFR} [\text{mL}/(\text{min} \times 1.73 \text{ m}^2)] = 186.3 \times \text{serum creatinine (Scr)}^{-1.154} \times (\text{age})^{-0.203} \times (0.742 \text{ female})</math>; Scr in mg/dL and age in years</p> <ul style="list-style-type: none"> <li>◆ Patients who planned to undergo revascularization [PCI or coronary artery bypass grafting (CABG)] recently</li> <li>◆ Patients allergic to a variety of foods, or with known allergy to study drugs, including their components</li> <li>◆ Patients pregnant, preparing for pregnancy, or lactating</li> <li>◆ Patients participating in other clinical trials during the same period</li> <li>◆ Patients considered inappropriate to participate in this study</li> </ul> |
|-------------------------------------------------------------------------------------------------------------------------------------------------------------------------------------------------------------------------------------------------------------------------------------------------------------------------------------------------------------------------------------------------------------------------------|--------------------------------------------------------------------------------------------------------------------------------------------------------------------------------------------------------------------------------------------------------------------------------------------------------------------------------------------------------------------------------------------------------------------------|---------------------------------------------------------------------------------------------------------------------------------------------------------------------------------------------------------------------------------------------------------------------------------------------------------------------------------------------------------------------------------------------------------------------------------------------------------------------------------------------------------------------------------------------------------------------------------------------------------------------------------------------------------------------------------------------------------------------------------------------------------------------------------------------------------------------------------------------------------------------------------------------------------------------------------------------------------------------------------------------------------------------------------------------------------------------------|

---

Table 2. Study schedule of assessments

|                       | Study period |            |              |                  |
|-----------------------|--------------|------------|--------------|------------------|
|                       | Enrollment   | Allocation | Intervention | Follow-up        |
| Time point            | -2 week      | 0          | 7-14 days    | 1,3 and 6 months |
| <b>ENROLLMENT:</b>    | <b>X</b>     |            |              |                  |
| Eligibility screen    | <b>X</b>     |            |              |                  |
| Informed consent      | <b>X</b>     |            |              |                  |
| Allocation            |              | <b>X</b>   |              |                  |
| <b>INTERVENTIONS:</b> |              |            |              |                  |
| SXT treatment         |              |            | <b>X</b>     |                  |
| Placebo treatment     |              |            | <b>X</b>     |                  |
| <b>ASSESSMENTS:</b>   |              |            |              |                  |
| MACE                  |              |            | <b>X</b>     | <b>X</b>         |
| CK-MB                 |              | <b>X</b>   | <b>X</b>     |                  |
| cTnT                  |              | <b>X</b>   | <b>X</b>     |                  |
| cTnI                  |              | <b>X</b>   | <b>X</b>     |                  |
| hsTnI                 |              | <b>X</b>   | <b>X</b>     |                  |
| Adverse events        |              |            | <b>X</b>     | <b>X</b>         |

Abbreviations: CK-MB, creatine kinase MB; MACE, major adverse cardiac events; cTn, cardiac troponin; hsTn, high-sensitivity Troponin; UA, unstable angina.

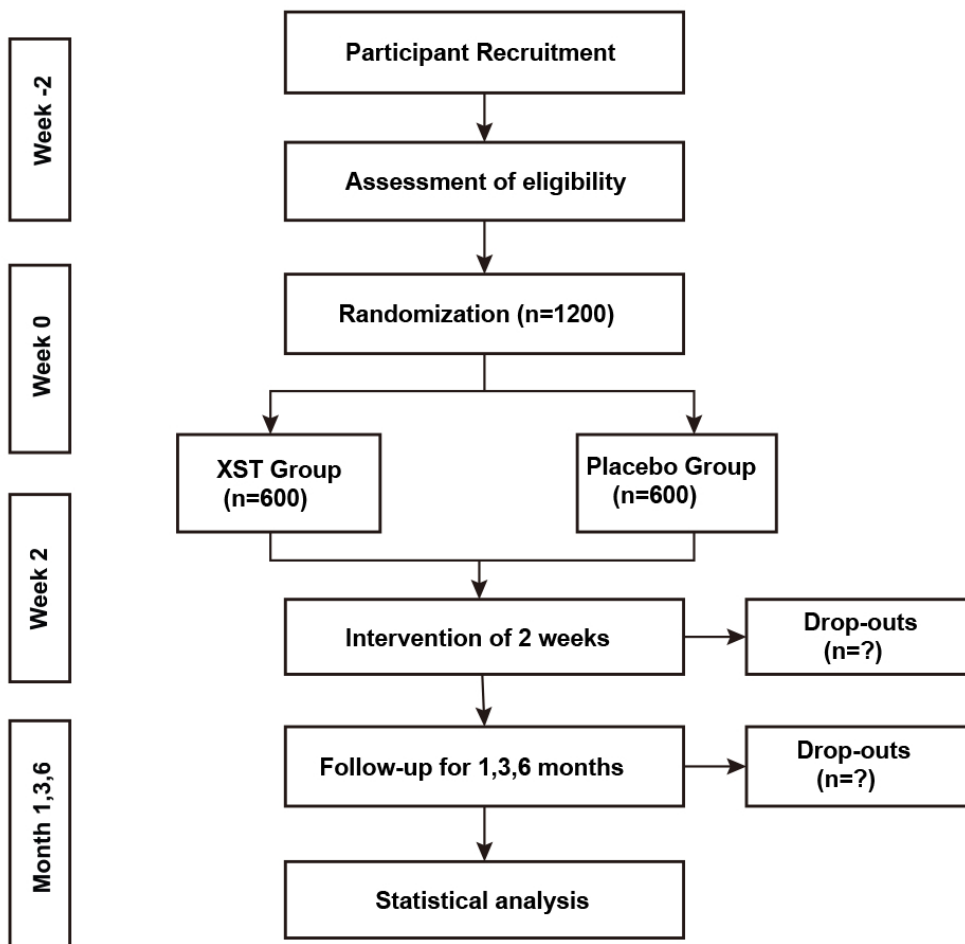

fig 1

80x77mm (300 x 300 DPI)

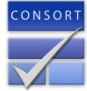

## CONSORT 2010 checklist of information to include when reporting a randomised trial\*

| Section/Topic                    | Item No | Checklist Item                                                                                                                                                                              | Reported on page No |
|----------------------------------|---------|---------------------------------------------------------------------------------------------------------------------------------------------------------------------------------------------|---------------------|
| <b>Title and abstract</b>        |         |                                                                                                                                                                                             |                     |
|                                  | 1a      | Identification as a randomised trial in the title                                                                                                                                           | 1                   |
|                                  | 1b      | Structured summary of trial design, methods, results, and conclusions (for specific guidance see CONSORT for abstracts)                                                                     | 3                   |
| <b>Introduction</b>              |         |                                                                                                                                                                                             |                     |
| Background and objectives        | 2a      | Scientific background and explanation of rationale                                                                                                                                          | 4                   |
|                                  | 2b      | Specific objectives or hypotheses                                                                                                                                                           | 4                   |
| <b>Methods</b>                   |         |                                                                                                                                                                                             |                     |
| Trial design                     | 3a      | Description of trial design (such as parallel, factorial) including allocation ratio                                                                                                        | 5                   |
|                                  | 3b      | Important changes to methods after trial commencement (such as eligibility criteria), with reasons                                                                                          | 5                   |
| Participants                     | 4a      | Eligibility criteria for participants                                                                                                                                                       | 6                   |
|                                  | 4b      | Settings and locations where the data were collected                                                                                                                                        | 6                   |
| Interventions                    | 5       | The interventions for each group with sufficient details to allow replication, including how and when they were actually administered                                                       | 8                   |
| Outcomes                         | 6a      | Completely defined pre-specified primary and secondary outcome measures, including how and when they were assessed                                                                          | 8-9                 |
|                                  | 6b      | Any changes to trial outcomes after the trial commenced, with reasons                                                                                                                       | 8-9                 |
| Sample size                      | 7a      | How sample size was determined                                                                                                                                                              | 8-9                 |
|                                  | 7b      | When applicable, explanation of any interim analyses and stopping guidelines                                                                                                                |                     |
| <b>Randomisation:</b>            |         |                                                                                                                                                                                             |                     |
| Sequence generation              | 8a      | Method used to generate the random allocation sequence                                                                                                                                      | 8-10                |
|                                  | 8b      | Type of randomisation; details of any restriction (such as blocking and block size)                                                                                                         | 8-10                |
| Allocation concealment mechanism | 9       | Mechanism used to implement the random allocation sequence (such as sequentially numbered containers), describing any steps taken to conceal the sequence until interventions were assigned | 8-10                |
| Implementation                   | 10      | Who generated the random allocation sequence, who enrolled participants, and who assigned participants to interventions                                                                     | 8-10                |

|    |                          |     |                                                                                                                                          |       |
|----|--------------------------|-----|------------------------------------------------------------------------------------------------------------------------------------------|-------|
| 1  | Blinding                 | 11a | If done, who was blinded after assignment to interventions (for example, participants, care providers, those assessing outcomes) and how | 8     |
| 2  |                          |     |                                                                                                                                          |       |
| 3  |                          | 11b | If relevant, description of the similarity of interventions                                                                              | 8     |
| 4  | Statistical              | 12a | Statistical methods used to compare groups for primary and secondary outcomes                                                            | 10-11 |
| 5  | methods                  | 12b | Methods for additional analyses, such as subgroup analyses and adjusted analyses                                                         | 10-11 |
| 6  |                          |     |                                                                                                                                          |       |
| 7  | <b>Results</b>           |     |                                                                                                                                          |       |
| 8  | Participant flow (a      | 13a | For each group, the numbers of participants who were randomly assigned, received intended                                                | 6     |
| 9  | diagram is strongly      |     | treatment, and were analysed for the primary outcome                                                                                     |       |
| 10 | recommended)             | 13b | For each group, losses and exclusions after randomisation, together with reasons                                                         |       |
| 11 |                          |     |                                                                                                                                          |       |
| 12 | Recruitment              | 14a | Dates defining the periods of recruitment and follow-up                                                                                  | 8     |
| 13 |                          | 14b | Why the trial ended or was stopped                                                                                                       | 8     |
| 14 |                          |     |                                                                                                                                          |       |
| 15 | Baseline data            | 15  | A table showing baseline demographic and clinical characteristics for each group                                                         |       |
| 16 | Numbers                  | 16  | For each group, number of participants (denominator) included in each analysis and whether the                                           |       |
| 17 | analysed                 |     | analysis was by original assigned groups                                                                                                 |       |
| 18 |                          |     |                                                                                                                                          |       |
| 19 | Outcomes and             | 17a | For each primary and secondary outcome, results for each group, and the estimated effect size and its                                    |       |
| 20 | estimation               |     | precision (such as 95% confidence interval)                                                                                              |       |
| 21 |                          | 17b | For binary outcomes, presentation of both absolute and relative effect sizes is recommended                                              |       |
| 22 |                          |     |                                                                                                                                          |       |
| 23 | Ancillary analyses       | 18  | Results of any other analyses performed, including subgroup analyses and adjusted analyses,                                              |       |
| 24 |                          |     | distinguishing pre-specified from exploratory                                                                                            |       |
| 25 | Harms                    | 19  | All important harms or unintended effects in each group (for specific guidance see CONSORT for harms)                                    |       |
| 26 |                          |     |                                                                                                                                          |       |
| 27 | <b>Discussion</b>        |     |                                                                                                                                          |       |
| 28 | Limitations              | 20  | Trial limitations, addressing sources of potential bias, imprecision, and, if relevant, multiplicity of                                  | 11    |
| 29 |                          |     | analyses                                                                                                                                 |       |
| 30 | Generalisability         | 21  | Generalisability (external validity, applicability) of the trial findings                                                                | 11    |
| 31 |                          |     |                                                                                                                                          |       |
| 32 | Interpretation           | 22  | Interpretation consistent with results, balancing benefits and harms, and considering other relevant                                     | 11    |
| 33 |                          |     | evidence                                                                                                                                 |       |
| 34 |                          |     |                                                                                                                                          |       |
| 35 | <b>Other information</b> |     |                                                                                                                                          |       |
| 36 | Registration             | 23  | Registration number and name of trial registry                                                                                           | 1     |
| 37 | Protocol                 | 24  | Where the full trial protocol can be accessed, if available                                                                              |       |
| 38 | Funding                  | 25  | Sources of funding and other support (such as supply of drugs), role of funders                                                          | 11    |
| 39 |                          |     |                                                                                                                                          |       |

\*We strongly recommend reading this statement in conjunction with the CONSORT 2010 Explanation and Elaboration for important clarifications on all the items. If relevant, we also recommend reading CONSORT extensions for cluster randomised trials, non-inferiority and equivalence trials, non-pharmacological treatments, herbal interventions, and pragmatic trials. Additional extensions are forthcoming: for those and for up to date references relevant to this checklist, see [www.consort-statement.org](http://www.consort-statement.org).

# BMJ Open

## **Efficacy and safety of Xueshuantong injection (lyophilized) in reducing the incidence of major adverse cardiovascular events in patients with unstable angina: A protocol of a randomized, parallel-arm, controlled, double-blind, and multicenter clinical trial based on dual antiplatelet therapy**

|                                 |                                                                                                                                                                                                                                                                                                                                                                                                                                                                                                                                                                                                                                                                                                                                                                                                                                                                                                                                                                                                                                                                                                                                                                                                                                                                                                                                                                                                                                                                                                                                                                                                                                                                                                                                                                                                             |
|---------------------------------|-------------------------------------------------------------------------------------------------------------------------------------------------------------------------------------------------------------------------------------------------------------------------------------------------------------------------------------------------------------------------------------------------------------------------------------------------------------------------------------------------------------------------------------------------------------------------------------------------------------------------------------------------------------------------------------------------------------------------------------------------------------------------------------------------------------------------------------------------------------------------------------------------------------------------------------------------------------------------------------------------------------------------------------------------------------------------------------------------------------------------------------------------------------------------------------------------------------------------------------------------------------------------------------------------------------------------------------------------------------------------------------------------------------------------------------------------------------------------------------------------------------------------------------------------------------------------------------------------------------------------------------------------------------------------------------------------------------------------------------------------------------------------------------------------------------|
| Journal:                        | <i>BMJ Open</i>                                                                                                                                                                                                                                                                                                                                                                                                                                                                                                                                                                                                                                                                                                                                                                                                                                                                                                                                                                                                                                                                                                                                                                                                                                                                                                                                                                                                                                                                                                                                                                                                                                                                                                                                                                                             |
| Manuscript ID                   | bmjopen-2020-038074.R1                                                                                                                                                                                                                                                                                                                                                                                                                                                                                                                                                                                                                                                                                                                                                                                                                                                                                                                                                                                                                                                                                                                                                                                                                                                                                                                                                                                                                                                                                                                                                                                                                                                                                                                                                                                      |
| Article Type:                   | Protocol                                                                                                                                                                                                                                                                                                                                                                                                                                                                                                                                                                                                                                                                                                                                                                                                                                                                                                                                                                                                                                                                                                                                                                                                                                                                                                                                                                                                                                                                                                                                                                                                                                                                                                                                                                                                    |
| Date Submitted by the Author:   | 15-May-2020                                                                                                                                                                                                                                                                                                                                                                                                                                                                                                                                                                                                                                                                                                                                                                                                                                                                                                                                                                                                                                                                                                                                                                                                                                                                                                                                                                                                                                                                                                                                                                                                                                                                                                                                                                                                 |
| Complete List of Authors:       | <p>Long, Wenjie; Guangzhou University of Traditional Chinese Medicine First Affiliated Hospital; Guangzhou University of Chinese Medicine, Lingnan Medical Research Center</p> <p>Liao, Huili; Guangzhou University of Traditional Chinese Medicine First Affiliated Hospital, Department of Geriatrics,</p> <p>Huang , Xi ; Guangzhou University of Chinese Medicine, The First Clinical College</p> <p>Liu, Qingqing; Guangzhou University of Chinese Medicine, The First Clinical College,</p> <p>Tang, Yaqing ; Guangzhou University of Traditional Chinese Medicine First Affiliated Hospital, National Drug Clinical Trial Agency Office</p> <p>Lu, Liming; Guangzhou University of Chinese Medicine, Clinical Research Center</p> <p>Liu, Jianhong; Guangzhou University of Traditional Chinese Medicine First Affiliated Hospital, Department of Geriatrics</p> <p>Yuan, Tianhui ; Guangzhou University of Traditional Chinese Medicine First Affiliated Hospital, National Drug Clinical Trial Agency Office</p> <p>Ling, Yan ; Guangzhou University of Traditional Chinese Medicine First Affiliated Hospital, Department of Geriatrics</p> <p>Hong, Yu; Guangzhou University of Traditional Chinese Medicine First Affiliated Hospital, Department of Geriatrics</p> <p>Duan , Jiao ; Guangzhou University of Traditional Chinese Medicine First Affiliated Hospital, Department of Geriatrics</p> <p>Lin , Weiji ; Guangzhou University of Traditional Chinese Medicine First Affiliated Hospital, Department of Geriatrics</p> <p>Xian, Shaoxiang; Guangzhou University of Traditional Chinese Medicine First Affiliated Hospital, Department of Geriatrics</p> <p>Yang, Zhongqi; Guangzhou University of Traditional Chinese Medicine First Affiliated Hospital, Department of Geriatrics</p> |
| <b>Primary Subject Heading</b>: | Cardiovascular medicine                                                                                                                                                                                                                                                                                                                                                                                                                                                                                                                                                                                                                                                                                                                                                                                                                                                                                                                                                                                                                                                                                                                                                                                                                                                                                                                                                                                                                                                                                                                                                                                                                                                                                                                                                                                     |
| Secondary Subject Heading:      | Complementary medicine                                                                                                                                                                                                                                                                                                                                                                                                                                                                                                                                                                                                                                                                                                                                                                                                                                                                                                                                                                                                                                                                                                                                                                                                                                                                                                                                                                                                                                                                                                                                                                                                                                                                                                                                                                                      |
| Keywords:                       | CARDIOLOGY, Adult cardiology < CARDIOLOGY, Coronary heart disease < CARDIOLOGY                                                                                                                                                                                                                                                                                                                                                                                                                                                                                                                                                                                                                                                                                                                                                                                                                                                                                                                                                                                                                                                                                                                                                                                                                                                                                                                                                                                                                                                                                                                                                                                                                                                                                                                              |

1  
2  
3  
4  
5  
6  
7  
8  
9  
10  
11  
12  
13  
14  
15  
16  
17  
18  
19  
20  
21  
22  
23  
24  
25  
26  
27  
28  
29  
30  
31  
32  
33  
34  
35  
36  
37  
38  
39  
40  
41  
42  
43  
44  
45  
46  
47  
48  
49  
50  
51  
52  
53  
54  
55  
56  
57  
58  
59  
60

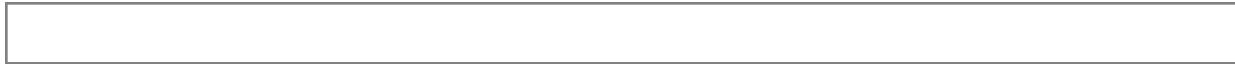

SCHOLARONE™  
Manuscripts





I, the Submitting Author has the right to grant and does grant on behalf of all authors of the Work (as defined in the below author licence), an exclusive licence and/or a non-exclusive licence for contributions from authors who are: i) UK Crown employees; ii) where BMJ has agreed a CC-BY licence shall apply, and/or iii) in accordance with the terms applicable for US Federal Government officers or employees acting as part of their official duties; on a worldwide, perpetual, irrevocable, royalty-free basis to BMJ Publishing Group Ltd ("BMJ") its licensees and where the relevant Journal is co-owned by BMJ to the co-owners of the Journal, to publish the Work in this journal and any other BMJ products and to exploit all rights, as set out in our [licence](#).

The Submitting Author accepts and understands that any supply made under these terms is made by BMJ to the Submitting Author unless you are acting as an employee on behalf of your employer or a postgraduate student of an affiliated institution which is paying any applicable article publishing charge ("APC") for Open Access articles. Where the Submitting Author wishes to make the Work available on an Open Access basis (and intends to pay the relevant APC), the terms of reuse of such Open Access shall be governed by a Creative Commons licence – details of these licences and which [Creative Commons](#) licence will apply to this Work are set out in our licence referred to above.

Other than as permitted in any relevant BMJ Author's Self Archiving Policies, I confirm this Work has not been accepted for publication elsewhere, is not being considered for publication elsewhere and does not duplicate material already published. I confirm all authors consent to publication of this Work and authorise the granting of this licence.

1  
2  
3  
4 **Efficacy and safety of Xueshuantong injection (lyophilized) in reducing the**  
5 **incidence of major adverse cardiovascular events in patients with unstable**  
6 **angina: A protocol of a randomized, parallel-arm, controlled, double-blind, and**  
7 **multicenter clinical trial based on dual antiplatelet therapy**  
8  
9

10  
11  
12 **Running title: Efficacy and safety of Xueshuantong injection in patients with**  
13 **UA**  
14

15  
16  
17 Wenjie Long PhD<sup>1,3†</sup>, Huili Liao MD<sup>1†</sup>, Xi Huang MD<sup>2</sup>, Qingqing Liu MD<sup>2</sup>, Yaqing  
18  
19 Tang MD<sup>4</sup>, Liming Lu PhD<sup>5</sup>, Jianhong Liu MD<sup>1</sup>, Tianhui Yuan MD<sup>4</sup>, Yan Ling PhD<sup>1</sup>,  
20  
21 Yu Hong MD<sup>1</sup>, Jiao Duan MD<sup>1</sup>, Wei Ji Lin MD<sup>1</sup>, Shaoxiang Xian PhD<sup>1,3\*</sup>, Zhongqi  
22  
23 Yang PhD<sup>1,3\*</sup>  
24  
25

26  
27 <sup>1</sup> Department of Geriatrics, The First Affiliated Hospital of Guangzhou University of  
28  
29 Chinese Medicine, No.16 Jichang Road, Baiyun District, Guangzhou, 510405, P.R.  
30  
31 China  
32  
33

34  
35 <sup>2</sup> The First Clinical College, Guangzhou University of Chinese Medicine, No.12  
36  
37 Jichang Road, Baiyun District, Guangzhou, 510405, P.R. China  
38  
39

40  
41 <sup>3</sup> Lingnan Medical Research Center, Guangzhou University of Chinese Medicine,  
42  
43 Jichang road No.12, Guangzhou, Guangdong 510000, China  
44  
45

46  
47 <sup>4</sup> National Drug Clinical Trial Agency Office, The First Affiliated Hospital of  
48  
49 Guangzhou University of Chinese Medicine, No.16 Jichang Road, Baiyun District,  
50  
51 Guangzhou, 510405, P.R. China.  
52

53  
54 <sup>5</sup> Clinical Research Center, South China Research Center for Acupuncture and  
55  
56 Moxibustion, Medical College of Acu-Moxi and Rehabilitation, Guangzhou University  
57  
58

1  
2  
3  
4 of Chinese Medicine, No.232 Waihuan Dong Road, Guangzhou, 510006, Guangdong,  
5  
6  
7 China.

8 † These authors contributed equally to this work.  
9

10  
11  
12  
13  
14 **\*Corresponding Author:**

15  
16 Shaoxiang Xi

17  
18 Department of Geriatrics, The First Affiliated Hospital of Guangzhou University of  
19  
20 Chinese Medicine, No.16 Jichang Road, Baiyun District, Guangzhou, 510405, P.R.  
21  
22  
23 China

24  
25  
26  
27 Lingnan Medical Research Center, Guangzhou University of Chinese Medicine,  
28  
29 Jichang road No.12, Guangzhou, Guangdong 510000, China

30  
31  
32 Tel: +86-18620602046

33  
34 Fax: +86-21-57643271

35  
36  
37 E-mail: Shaoxiangx@hotmail.com

38  
39  
40 Zhongqi Yang

41  
42 Department of Geriatrics, The First Affiliated Hospital of Guangzhou University of  
43  
44 Chinese Medicine, No.16 Jichang Road, Baiyun District, Guangzhou, 510405, P.R.  
45  
46  
47 China

48  
49  
50 Lingnan Medical Research Center, Guangzhou University of Chinese Medicine,  
51  
52 Jichang road No.12, Guangzhou, Guangdong 510000, China

53  
54  
55 Tel: +86-13560231626

1  
2  
3  
4 Fax: +86-21-57643271  
5  
6  
7  
8

9 E-mail: [Yang\\_zhongqi@163.com](mailto:Yang_zhongqi@163.com); [Yangzhongqi@gzucm.edu.cn](mailto:Yangzhongqi@gzucm.edu.cn)  
10  
11  
12  
13  
14  
15

### 16 **List of abbreviation**

17  
18  
19 ACS, Acute coronary syndrome; ACEI, angiotensin-converting enzyme inhibitors;  
20 CABG, coronary artery bypass grafting; cTn, cardiac troponin; CK-MB, creatine  
21 kinase MB; HDL-C, low high-density lipoprotein cholesterol; LDL-C, high low-  
22 density lipoprotein cholesterol; MACE, major adverse cardiac events; PCI,  
23 percutaneous coronary intervention; STEMI, ST-segment elevation myocardial  
24 infarction; hsTn, high-sensitivity troponin; UA, unstable angina  
25  
26  
27  
28  
29  
30  
31  
32  
33  
34  
35  
36  
37  
38  
39  
40  
41  
42  
43  
44  
45  
46  
47  
48  
49  
50  
51  
52  
53  
54  
55  
56  
57  
58  
59  
60

## Abstract

**Introduction:** Unstable angina (UA), referred to as acute coronary syndrome (ACS), causes unexpected chest pain. Xueshuantong injection (lyophilized) (XST) is a traditional Chinese herbal injection having the potential to treat ACS. However, no clinical trial has been performed in this field. This clinical trial aims to examine the efficacy and safety of XST.

**Methods and Analysis:** This is a randomized, parallel-arm, controlled, double-blind, and multicenter clinical trial. A total of 1200 participants with UA will be enrolled in a 1:1 ratio, with 600 patients included in the XST treatment group and 600 with one-twentieth dose in the control group. The efficacy assessment and major adverse cardiovascular events (MACE) will be observed, and the frequency of angina attack, angina pectoris will be examined at the start and end of the run-in period. All AEs will be recorded, regardless of severity, to assess the safety of XST. The baseline characteristics of patients will be summarized and compared using the *t* test or nonparametric statistical test. Qualitative data will be analyzed using the chi-square or Fisher exact tests, Cochran–Mantel–Hasenszel (CMH) test, and Wilcoxon test.

**Ethics and Dissemination:** This trial has been approved by Research Ethics Committee of The First Affiliated Hospital of Guangzhou University of Chinese Medicine, China (approval number: ZYYEC [2017] 0021). Written informed consent will be obtained from all participants. The results of this trial will be disseminated to the public through academic conferences and peer-reviewed journals.

**Trial registration:** This study was registered on the Chinese Clinical Trial Registry (<http://www.chictr.org.cn/>) with the ID ChiCTR1800015911.

**Key words:** Acute coronary syndrome, clinical trial, traditional Chinese herbal injection, unstable angina

**Strengths and limitations of this study:**

1. This is a randomized, parallel-arm, controlled, double-blind, and multicenter clinical trial.
2. The trial will be conducted in 17 medical centers with 1200 participants.
3. In our study, to better implement the blind method, the extremely low dose 25mg is used as the control group.
4. The efficacy assessment and major adverse cardiovascular events (MACE) will be observed, and the frequency of angina attack, angina pectoris will be examined at the start and end of the run-in period.
5. Our experiments will be conducted in different regions of China, and whether similar effects are available to other ethnic groups and regions remains uncertain.

## Introduction

Unstable angina (UA), referred to as acute coronary syndrome (ACS), causes unexpected chest pain. Reduced blood flow to the heart muscle is the most common cause of UA because the coronary arteries are narrowed by atherosclerosis, leading to the rupture of coronary blood vessels and hence blood clotting, which blocks the flow of blood to the heart muscle. The risk factors for UA include diabetes, obesity, family history of heart disease, high blood pressure, high low-density lipoprotein cholesterol, low high-density lipoprotein cholesterol, male sex, and use of any form of tobacco<sup>[1, 2]</sup>. With the wide application of percutaneous coronary intervention (PCI) in patients with ACS, current guidelines recommend potent platelet inhibition with prasugrel or ticagrelor for 12 months after ACS management with PCI. However, the greatest anti-ischemic benefit of potent antiplatelet drugs over the less-potent clopidogrel occurs early, while most excess bleeding events occur during chronic treatment. It is related to the efforts of physicians to reduce the adverse incidence of cardiovascular events, promote the patient's early recovery, and improve their health-related quality of life.

Xueshuantong injection (lyophilized) (XST) is a traditional Chinese herbal injection comprising a series of saponins extracted from *Panax notoginseng*. It has been approved by the China Food and Drug Administration (China drug approval number: Z 20025652) and collected according to the "2012 national essential drugs list" and People's Republic of China Pharmacopoeia, respectively. It has been reported to have anti-inflammatory effects that correct endothelial dysfunction *in vivo*<sup>[3]</sup> and *in vitro*<sup>[4]</sup>. Clinically, as a common medicine in China's Grade-A Tertiary Hospital, XST has been reported to be beneficial in treating ACS<sup>[5, 6]</sup>. In preliminary studies, including small samples, XST has been found to platelet aggregation inhibition, anti-myocardial ischemia, anti-inflammation, anti-oxidation, protecting endothelial cells, which could reduce the incidence of major adverse cardiovascular events (MACE)<sup>[7]</sup>. As the primary component<sup>[8]</sup>, *Panax notoginseng*, has been extensively verified that it can ameliorate ischemia-reperfusion (IR)-induced injury in cardiovascular and neuronal systems

1  
2  
3  
4 mainly by upregulating the activity of estrogen receptor  $\alpha$ -dependent  
5 phosphoinositide 3-kinase (PI3K)/protein kinase B (AKT) and nuclear factor erythroid-  
6 2-related factor 2 (NRF2) pathways and downregulating nuclear factor- $\kappa$  B (NF- $\kappa$  B)  
7 and mitogen-activated protein kinase (MAPK) pathways. The high-quality trials and  
8 evidence are needed to prove the efficacy of XST. This randomized, parallel, controlled,  
9 double-blind, and multicenter clinical trial aims to examine the efficacy and safety of  
10 XST in patients with UA. The results of this trial may provide clinical evidence for  
11 treating patients with UA.  
12  
13  
14  
15  
16  
17  
18  
19  
20  
21

## 22 **2. Method and design**

### 23 **2.1 Study design**

24  
25  
26  
27 This randomized, parallel-arm, controlled, double-blind, and multicenter clinical  
28 trial will be conducted in 17 medical centers in China: The First Affiliated Hospital of  
29 Guangzhou University of Chinese Medicine, The First Affiliated Hospital of the  
30 Henan University of Chinese Medicine, Luoyang No. 1 Hospital of Traditional  
31 Chinese Medicine, Shanxi Fenyang Hospital, The First Affiliated Hospital of Henan  
32 University of Science and Technology, Zhengzhou People's Hospital, Zhengzhou  
33 Central Hospital, Ruikang Hospital Affiliated to Guangxi University of Traditional  
34 Chinese Medicine, Nanjing Hospital of Chinese Medicine, Shuguang Hospital  
35 Affiliated to Shanghai University of Chinese Medicine, Changsha Fourth Hospital,  
36 The First Affiliated Hospital of Hunan University of Traditional Chinese Medicine,  
37 The Second Affiliated Hospital of Heilongjiang University of Traditional Chinese  
38 Medicine, The Second Affiliated Hospital of Tianjin University of Traditional  
39 Chinese Medicine, Affiliated Hospital of Tianjin Academy of Chinese Medicine,  
40 Tianjin Beichen District Hospital of Traditional Chinese Medicine, and Wenzhou  
41 Hospital of Traditional Chinese Medicine. A total of 1200 patients with UA who met  
42 the selection will be enrolled in a 1:1 ratio, with 600 patients included in the XST  
43  
44  
45  
46  
47  
48  
49  
50  
51  
52  
53  
54  
55  
56  
57  
58  
59  
60



1  
2  
3  
4 treatment group and 600 in the control group.  
5

6 All the visits will be recorded in electronic care report forms through the  
7 Electronic Data Capture system, which is accessed online via the Internet for data  
8 collection and management. The protocol of this study was developed in accordance  
9 with the standard protocol project: Interventional Trial Recommendations  
10 guidelines<sup>[9]</sup>.  
11  
12  
13  
14  
15  
16  
17  
18

## 19 **2.2 Ethics**

20 This study has been approved by the ethics committee of the First Affiliated  
21 Hospital of Guangzhou University of Chinese Medicine (approval number:  
22 ZYYEC[2017]002) and 17 other medical centers, which have been approved by the  
23 ethics committee by the respective medical centers. The trial has been registered on  
24 the Chinese Clinical Trial Registry with the ID ChiCTR1800015911.  
25  
26  
27  
28  
29  
30  
31  
32  
33  
34

## 35 **2.3 Patient and public involvement**

36 This clinical trial was designed to evaluate the efficacy and safety of XST in  
37 patients with UA. Clinically, XST has been found to be beneficial in treating ACS,  
38 which had been widely used in China's Grade-A Tertiary Hospital. More high-quality  
39 trials and evidence are needed to prove the efficacy of XST. The outcome measures  
40 used in this trial were considered as important endpoints in clinical practice. The  
41 participants of this trial will be recruited from 17 medical centers in China. However,  
42 patients were not directly involved in the design, recruitment, or conduct of the study.  
43 After the trial completes, the results of this study will be disseminated to the public  
44 through academic conferences and peer-reviewed journals. Once the manuscript is  
45 published, the results will be briefly summarized in a simple language and inform all  
46 trial participants through the telephone. The burden of intervention will not be assessed  
47  
48  
49  
50  
51  
52  
53  
54  
55  
56  
57  
58  
59  
60

1  
2  
3  
4 by the trial participants.  
5  
6  
7

## 8 9 **2.4 Study population**

10  
11 Patients will be included after written informed consent and enrolled in the study  
12 when the inclusion and exclusion criteria are met (Table 1).  
13  
14

### 15 **2.4.1 Withdrawal criteria**

- 16  
17 1. Patients with some comorbidities, complications, or special physiological changes  
18 during the trial  
19
- 20  
21 2. Patients with poor compliance in the trial; the use of the drug not reaching 80%  
22 (except for those recovered in advance) or exceeding 120% of the prescribed  
23 amount  
24  
25
- 26  
27 3. Patients with blindness or emergency unblinding during the trial  
28
- 29  
30 4. Patients with serious adverse events and those not appropriate to continue the test  
31
- 32  
33 5. Patients failing to use the test drug  
34
- 35  
36 6. Patients misdiagnosed or not matching the inclusion criteria and accidentally  
37 included  
38
- 39  
40 7. Patients with no follow-up records  
41
- 42  
43 8. Patients failing to comply with the treatment during the trial, changing the  
44 medicines, or adding nonspecified therapeutic medications by themselves,  
45 especially those medications that may affect the evaluation of the test drug,  
46 affecting the validity and safety.  
47  
48  
49  
50

## 51 **2.5 Study setting and recruitment**

52  
53  
54 Between December 2018 and December 2020, 1200 outpatients or inpatient will  
55 be recruited at the 17 centers mentioned earlier through the official website of the  
56  
57  
58

1  
2  
3  
4 hospitals, posters, and networks. The physicians will diagnose the participants, and  
5  
6 the research assistants will manage the recruitment.  
7  
8  
9

## 10 **2.6 Randomization**

11  
12  
13 On the day of enrollment, statistical analysis system software will be used to  
14  
15 generate the random arrangement of 1200 people in 2 groups (XST and placebo groups)  
16  
17 with the method of central stratified regional group randomization. The randomization  
18  
19 numbers will be kept in opaque sealed envelopes. The physicians and patients will not  
20  
21 be aware of the grouping and intervention.  
22  
23  
24  
25  
26

## 27 **2.7 Blinding**

28  
29 This study has a double-blind design. Because XST was lyophilized powder form  
30  
31 in this study, which was a kind of white or light yellow amorphous powder or loose  
32  
33 solid, and was dissolved with an appropriate amount of injection sodium chloride  
34  
35 injection before use, there were color changes and a small amount of powder  
36  
37 precipitation. Therefore, in order to better implement the blind method, an extremely  
38  
39 low dose (25mg) was used as the control group, which is invalid for UA from our  
40  
41 previous pharmacokinetic experiment, did not increase the efficacy of the  
42  
43 experimental group.  
44  
45

46 The number of cases in the study and control groups will be in the ratio of  
47  
48 1:1. The blinding work will be completed by statisticians. To ensure the blinding of  
49  
50 investigators and participants to study treatment, the study drug or placebo will be  
51  
52 provided in identical packaging and labeling. Due to some natural variability in the  
53  
54 color of the study drug, which is batch dependent, the color of the placebo will be  
55  
56 matched to be the same as the average color of the study drug. Study drug and  
57  
58 placebo will be labeled with a unique label letter that will be used to assign treatment  
59  
60

1  
2  
3  
4 to the patient but will not indicate treatment allocation to investigators or participants.  
5  
6 No member of the study team and their extended staff, except for pharmacists and  
7  
8 biostatisticians, will have access to the randomization scheme during the conduct of  
9  
10 the study. In the event of a medical emergency, where breaking the blind is required  
11  
12 to provide medical care to the participant, the investigator will obtain the treatment  
13  
14 assignment from the trial pharmacists.  
15  
16  
17  
18

## 19 **2.8 Sample size calculation**

20  
21 MACE will be used as the effect index according to the statistical requirements of  
22  
23 the optimal validity test design.  
24  
25

26 Based on the expert advice combined with clinical practical considerations and  
27  
28 according to the loss rate of less than 20% estimated beforehand, the study sample was  
29  
30 1200 cases (600 cases in each group), assuming that the incidence of MACE was 12%  
31  
32 after dual antiplatelet therapy for 6 months, which was reduced by 6% after  
33  
34 lyophilization ( $\alpha = 0.05$ ; power = 0.9).  
35  
36  
37  
38

## 39 **2.9 Interventions**

40  
41 All participants will receive dual antiplatelet therapy (aspirin 100 mg/d +  
42  
43 clopidogrel 75 mg/d) and anticoagulation therapy (unfractionated heparin) according  
44  
45 to the 2014 American College of Cardiology/American Heart Association Guidelines  
46  
47 for the Diagnosis and Treatment of Non-ST-Segment Acute Coronary Syndrome, and  
48  
49 in accordance with the guidelines to accept statins, angiotensin-converting enzyme  
50  
51 inhibitors, beta-blockers, and nitrates. Patients with mild UA will undergo a  
52  
53 standardized baseline assessment before the treatment, including detailed medical  
54  
55 history, physical examination, and laboratory testing. Meanwhile, the following  
56  
57 treatments will be given to different groups:  
58  
59  
60

1  
2  
3  
4 (1) XST treatment group: The patients will be treated via an intravenous drip with  
5 500 mg XST (lyophilized) diluted with 250–500 mL of 5% glucose injection or  
6 sodium chloride injection, once per day for 7–14 days.  
7  
8

9  
10 (2) Control group: The patients will be treated via an intravenous drip with 25 mg  
11 XST (lyophilized) diluted with 250–500 mL of 5% glucose injection or sodium  
12 chloride injection, once per day for 7–14 days.  
13  
14

15  
16 The experimental drugs will be distributed by a drug administrator and injected by  
17 trained nurses.  
18

19  
20 Patients will be admitted to the hospital on the day of registration for the first  
21 intervention, and patients who discharge will move directly to the follow-up period.  
22 The efficacy and safety of XST will be assessed after treatment for 7–14 days and  
23 follow-up for 1, 3, and 6 months (Figs. 1 and Table 2).  
24  
25  
26  
27  
28  
29  
30

## 31 **2.10 Outcome measurements**

### 32 **2.10.1 Primary outcomes**

33  
34 The primary endpoints will include the incidence of composite endpoints for  
35 MACE, which is a commonly used indicator to evaluate the prognosis of patients with  
36 coronary heart disease or UA [10], including cardiovascular death, nonfatal myocardial  
37 infarction, and revascularization.  
38  
39  
40  
41  
42  
43  
44

45 The primary endpoint is the time from the enrollment to the end of the study  
46 (including the medication observation period and follow-up period) when any of the  
47 MACE events occur for the first time. The researchers will record through telephone  
48 interviews, in-patient and outpatient medical records of patients, and information  
49 provided by their family members. Patients without MACE during the study will be  
50 defined as censored at the end of the study. For patients who quit the trial early due to  
51 reasons other than MACE, the time of occurrence is defined as censoring at the time  
52  
53  
54  
55  
56  
57  
58  
59  
60

1  
2  
3  
4 of early termination. Deaths not due to cardiovascular diseases or that occur after the  
5 MACE will not be evaluated.  
6  
7  
8  
9

### 10 **2.10.2 Secondary outcomes**

11  
12  
13 The efficacy of angina pectoris will be observed at the time of enrollment and at  
14 the end of treatment, including the frequency of angina attack, the clinical  
15 manifestations, ECG and laboratory examination.  
16  
17  
18

19  
20 Myocardial injury markers [serum creatine kinase MB; cardiac troponin T/cardiac  
21 troponin I (cTnI)/high-sensitivity troponin I] will be monitored, in order to observe  
22 changes in myocardial injury during treatment and to assess efficacy and safety during  
23 treatment.  
24  
25  
26  
27  
28  
29  
30

### 31 **2.10.3 Safety assessment**

32  
33 An adverse event (AE) is any adverse medical event that occurs during the trial.  
34 The researchers will record the observation of vital signs, testing of blood and urine  
35 samples, renal and liver function at the start and end of the run-in period, and recorded  
36 abnormal changes and AEs at any time.  
37  
38  
39  
40  
41

42 In view of the particularity of the disease, the condition of the participants may  
43 change significantly during the observation, including the need for hospitalization for  
44 the deterioration of the disease, or even life-threatening. Since cardiovascular death,  
45 non-fatal myocardial infarction, and revascularization were the endpoints of this study,  
46 the above events would not be reported as serious adverse events (and described in the  
47 study history). Known adverse reaction of the XST: systemic injury: fever, chills,  
48 anaphylactic reaction, anaphylactic shock, etc.; the respiratory system damage: chest  
49 tightness, breathing difficulties, shortness of breath, asthma, laryngeal edema, etc.; skin  
50 and its appendages damage: rash, pruritus, dermatitis exfoliating; heart rate and  
51  
52  
53  
54  
55  
56  
57  
58  
59  
60

1  
2  
3  
4 arrhythmia: palpitations, tachycardia, etc.; central and peripheral nervous system  
5 damage: dizziness, headache, convulsions, tremor, etc.; gastrointestinal system damage:  
6 nausea, vomiting, etc.; cardiovascular system damage: cyanosis, flushing, decreased  
7 blood pressure, elevated blood pressure, etc.; other damage: blood in the urine,  
8 abnormal liver function, etc.  
9  
10  
11  
12

13  
14 Patients will be required to report all AEs at each visit. All AEs will be recorded,  
15 regardless of severity, to assess the safety of XST.  
16  
17

18  
19 If an AE occurs, the researchers will have to determine whether to stop the  
20 observation and proceed with the diagnosis and corresponding treatment. If any severe  
21 AE occurs, the researchers must take immediate action to ensure the safety of the  
22 participants. They must also report to the ethics committee within 24 h. The responsible  
23 staff from The First Affiliated Hospital of Guangzhou University of Chinese Medicine  
24 must promptly notify other participating centers and initiate any necessary legal  
25 procedures.  
26  
27  
28  
29  
30  
31  
32  
33  
34

### 35 **2.11 Follow-up**

36  
37  
38 All included participants will be evaluated for the occurrence of MACE after 1, 3,  
39 and 6 months through phone calls after the end of the medication. The trial will be  
40 ended if the following endpoints occur: death, nonfatal myocardial infarction, or  
41 revascularization (including PCI and CABG). The academic research on hemorrhage  
42 in Europe and the United States proposed a unified definition of hemorrhage type 3–5.  
43  
44  
45  
46  
47

48 The occurrence of the MACE must be recorded in an original supporting document,  
49 including but not limited to a copy of the discharge summary, a copy of the medical  
50 record, or other documents that can be used to verify the occurrence of the MACE and  
51 the date of its occurrence.  
52  
53  
54  
55  
56  
57  
58  
59  
60

## 2.12 Statistical analysis

### 2.12.1 Enrollment and case completion

The completion of the trial at each center must be recorded and described. All cases of shedding must be listed.

### 2.12.2 Baseline comparability analysis

The baseline characteristics of patients will be summarized and compared using the  $t$  test or nonparametric statistical test. Qualitative data will be analyzed using the chi-square or Fisher exact tests, Cochran–Mantel–Hasenszel (CMH) test, and Wilcoxon test.

### 2.12.3 Analysis of efficacy

(1) Baseline comparability analysis: This includes the description of demographic data, symptoms, and general conditions. The  $t$  test or nonparametric statistical method will be used for quantitative data. Qualitative data will be determined using the chi-square test, Fisher's exact probability method, CMH test, and Wilcoxon rank-sum test.

(2) Primary and secondary outcomes: The incidence of composite endpoints for MACE and the efficacy of angina pectoris will be compared between the two groups and analyzed using the chi-square or Fisher exact tests and two-sample  $t$  tests or Wilcoxon rank-sum test. The laboratory data on myocardial injury markers will be analyzed for the changes before and after the intervention. The average value of each laboratory data after the treatment will be compared.

(3) For cases of rejection and shedding, statistical descriptions will be performed one by one. Adverse reactions will be statistically described. The incidence of adverse reactions will be compared using the chi-square or Fisher exact tests.

## 3. Discussion



1  
2  
3  
4 XST is a traditional Chinese herbal injection consisting of a series of saponins  
5 extracted from *Panax notoginseng*. It has been approved by the China Food and Drug  
6 Administration (China drug approval number: Z 20025652) and collected according to  
7 the “2012 national essential drugs list” and the People’s Republic of China  
8 Pharmacopoeia, respectively. Total saponins, isolated from the root and rhizome of *P.*  
9 *notoginseng*, are the main components of XST.  
10  
11  
12  
13  
14

15  
16 *P. notoginseng* is known for promoting blood circulation, preventing thrombosis,  
17 and dilating blood vessels. It is widely applied to treat acute cerebral infarction, stroke,  
18 and coronary heart disease in clinical practice<sup>[11, 12]</sup>. Wang et al.<sup>[13]</sup> found that in a rat  
19 model of middle cerebral artery occlusion-reperfusion, administration of XST  
20 combined with salvianolate lyophilized (SLI) injection not only significantly decreased  
21 neurological deficit scores and infarct volumes, and increased regional cerebral blood  
22 flow. Gan et al.<sup>[14]</sup> evaluated the efficacy and safety of the *P. notoginseng* extract via  
23 intracoronary injection for treating the post-PCI slow-reflow phenomenon in patients  
24 with ST-segment elevation myocardial infarction and its impact on patients' prognosis.  
25 They found that coronary injection with tirofiban and XST was more effective in  
26 improving the coronary blood flow and showed no increase in the incidence of  
27 hemorrhagic complications compared with the injection with tirofiban only. *P.*  
28 *notoginseng* has been found to be beneficial to patients with UA. The use of the extract  
29 has been recommended for patients with UA in clinical practice as a complementary  
30 and alternative therapy<sup>[15]</sup>. However, more randomized controlled trials with reliable  
31 designs, large samples, and long-term observations are needed for further evaluations.  
32  
33  
34  
35  
36  
37  
38  
39  
40  
41  
42  
43  
44  
45  
46  
47

48 The meta-analysis of XST injection combined with routine basic treatment was  
49 superior to routine basic treatment alone in alleviating clinical symptoms, with  
50 statistically significant differences between the groups. XST injection combined with  
51 routine basic treatment could alleviate UA pectoris. However, due to the low quality of  
52 included studies, further well-designed, multicenter, and large-scale RCTs are still  
53 needed to evaluate the efficacy of XST injection<sup>[16]</sup>. Moreover, the total revenue from  
54  
55  
56  
57  
58  
59  
60

1  
2  
3  
4 XST in the Chinese market in 2013 was over \$700 million<sup>[17]</sup>. Therefore, the enormous  
5  
6 consumption requires stricter and accurate evidence on its safety. However, many  
7  
8 reports of XST were case reports, and hence large-sample and high-level evidence for  
9  
10 the efficacy and safety of XST is still lacking. Therefore, this study will be conducted  
11  
12 to investigate the efficacy and safety of XST in reducing the incidence of MACE in  
13  
14 patients with UA. The findings of this study will provide clinical evidence for the use  
15  
16 of XST in reducing the incidence of MACE in patients with UA.

### 17 18 19 20 **Acknowledgments**

21  
22 The authors are grateful to Professor Licheng Zhao from Guangzhou University of  
23  
24 Chinese Medicine for his guidance during this study. They also thank Miss Jingyi Xu,  
25  
26 who carefully checked the references.  
27  
28  
29  
30

### 31 32 **Contributors**

33  
34 ZY and WL wrote the study protocol. SX, HL, TY and YT developed the original  
35  
36 study design. XH, JL, YH, JD, YL and WL were all involved in the revision of the  
37  
38 study design and contributed in the review process of the protocol manuscript. YT and  
39  
40 QL are jointly responsible for the collection of data and administration of study  
41  
42 participants. LL provides methodological guidance on research statistics. ZY is the  
43  
44 principal investigator and responsible for the funding and overall management of the  
45  
46 trial.  
47  
48  
49  
50

### 51 52 **Funding**

53  
54 This study has been supported by the project “Efficacy and safety of Xueshuantong  
55  
56 injection (lyophilized) in reducing the incidence of MACE in patients with unstable  
57  
58 angina: A randomized, parallel-arm, controlled, double-blind, and multicenter clinical  
59  
60

1  
2  
3  
4 trial based on dual antiplatelet therapy” (no. 10600216) and the second batch of  
5 national Traditional Chinese Medicine(TCM ) clinical research base project (no.  
6 2018131).  
7  
8  
9  
10  
11  
12

### 13 **Disclaimer**

14  
15  
16 The funders have no role in the study design, data collection and analysis, decision to  
17 publish or preparation of the manuscript.  
18  
19  
20  
21  
22

### 23 **Trial status**

24  
25 Currently the participants are being enrolled for the trial.  
26  
27  
28

### 29 **Conflicts of interest**

30  
31 All authors declare no conflicts of interest.  
32  
33  
34  
35  
36  
37  
38  
39  
40  
41  
42  
43  
44  
45  
46  
47  
48  
49  
50  
51  
52  
53  
54  
55  
56  
57  
58  
59  
60

## References

1. Ueda P, Gulayin P, Danaei G. Long-term moderately elevated LDL-cholesterol and blood pressure and risk of coronary heart disease. *PloS one* 2018;13(7):e0200017. doi: 10.1371/journal.pone.0200017.
2. Kannel WB, Feinleib M. Natural history of angina pectoris in the Framingham study. Prognosis and survival. *The American journal of cardiology* 1972;29(2):154-63. doi: 10.1016/0002-9149(72)90624-8.
3. Wan JB, Lee SM, Wang JD, et al. Panax notoginseng reduces atherosclerotic lesions in ApoE-deficient mice and inhibits TNF-alpha-induced endothelial adhesion molecule expression and monocyte adhesion. *Journal of agricultural and food chemistry* 2009;57(15):6692-7. doi: 10.1021/jf900529w.
4. Wang N, Wan JB, Chan SW, et al. Comparative study on saponin fractions from Panax notoginseng inhibiting inflammation-induced endothelial adhesion molecule expression and monocyte adhesion. *Chinese medicine* 2011;6:37. doi: 10.1186/1749-8546-6-37
5. Gong X, Shen JH, Wu GP. Effect of Xueshuantong injection on cerebral infarction. *Hainan Yixueyuan Xuebao*. 2009;15(6):603–604.
6. Fu XX, Xiao WJ, Lu J, et al. Retrospective analysis of thrombolysis therapy for 64 cases of acute myocardial infarction with elevated ST segment. *Chinese journal of integrative medicine* 2009;15(6):462-5. doi: 10.1007/s11655-009-0462-8.
7. Han S, Chen Y, Wang J, et al. Anti-thrombosis Effects and Mechanisms by Xueshuantong Capsule Under Different Flow Conditions. *Front Pharmacol*. 2019;10:35. Published 2019 Feb 7. doi:10.3389/fphar.2019.00035
8. Liu H, Yang J, Yang W, et al. Focus on Notoginsenoside R1 in Metabolism and Prevention Against Human Diseases. *Drug Des Devel Ther*. 2020
9. Chan AW, Tetzlaff JM, Gotzsche PC, et al. SPIRIT 2013 explanation and elaboration: guidance for protocols of clinical trials. *BMJ (Clinical research ed)* 2013;346:e7586. doi: 10.1136/bmj.e7586

- 1  
2  
3  
4  
5  
6  
7  
8  
9  
10  
11  
12  
13  
14  
15  
16  
17  
18  
19  
20  
21  
22  
23  
24  
25  
26  
27  
28  
29  
30  
31  
32  
33  
34  
35  
36  
37  
38  
39  
40  
41  
42  
43  
44  
45  
46  
47  
48  
49  
50  
51  
52  
53  
54  
55  
56  
57  
58  
59  
60
10. Association of Initial and Serial C-Reactive Protein Levels With Adverse Cardiovascular Events and Death After Acute Coronary Syndrome: A Secondary Analysis of the VISTA-16 Trial. *JAMA Cardiol.* 2019;4(4):314-320.
  11. Yang X, Xiong X, Wang H, et al. Protective effects of panax notoginseng saponins on cardiovascular diseases: a comprehensive overview of experimental studies. *Evidence-based complementary and alternative medicine : eCAM* 2014;2014:204840. doi: 10.1155/2014/204840
  12. Gui Q, Yang Y, Ying S, et al. Xueshuantong improves cerebral blood perfusion in elderly patients with lacunar infarction. *Neural regeneration research* 2013;8(9):792-801. doi: 10.3969/j.issn.1673-5374.2013.09.003
  13. Wang FJ, Wang SX, Chai LJ, Zhang Y, Guo H, Hu LM. Xueshuantong injection (lyophilized) combined with salvianolate lyophilized injection protects against focal cerebral ischemia/reperfusion injury in rats through attenuation of oxidative stress. *Acta Pharmacol Sin.* 2018;39(6):998–1011. doi:10.1038/aps.2017.128
  14. Gan LJ, Zhang CH, Zhang M. [Effect of intracoronary injection with xuesaitong in treating post-PCI slow-reflow phenomenon in patients with ST-segment elevation myocardial infarction]. *Zhongguo Zhong xi yi jie he za zhi Zhongguo Zhongxiyi jiehe zazhi = Chinese journal of integrated traditional and Western medicine* 2010;30(4):348-51.
  15. Song H, Wang P, Liu J, et al. Panax notoginseng Preparations for Unstable Angina Pectoris: A Systematic Review and Meta-Analysis. *Phytotherapy research : PTR* 2017;31(8):1162-72. doi: 10.1002/ptr.5848
  16. Gao Y, Lyu J, Xie YM, Sun MH. Effectiveness and safety of Xueshuantong injection in treatment of UA pectoris: a systematic review and Meta-analysis of randomized controlled trials. *Zhongguo Zhong Yao Za Zhi.* 2019;44(20):4366-4378
  17. Wang FJ, Wang SX, Chai LJ, et al. Xueshuantong injection (lyophilized) combined with salvianolate lyophilized injection protects against focal cerebral ischemia/reperfusion injury in rats through attenuation of oxidative stress. *Acta pharmacologica Sinica* 2018;39(6):998-1011. doi: 10.1038/aps.2017.128

- 1  
2  
3  
4 18. Antman EM, Cohen M, Bernink PJ, et al. The TIMI risk score for unstable angina/non-ST elevation  
5 MI: A method for prognostication and therapeutic decision making. JAMA 2000;284(7):835-42.  
6  
7 doi: 10.1001/jama.284.7.835  
8  
9  
10  
11  
12  
13  
14  
15  
16

17  
18 Table 1. Inclusion and exclusion criteria  
19

| Inclusion criteria                                                                                                                                                                                                                                                                                                                                                                                                                                                                                                                                                                                                                                                                                                                            | Exclusion criteria                                                                                                                                                                                                                                                                                                                                                                                                                                                                                                                                                                                                                                                                                                                                                                              |
|-----------------------------------------------------------------------------------------------------------------------------------------------------------------------------------------------------------------------------------------------------------------------------------------------------------------------------------------------------------------------------------------------------------------------------------------------------------------------------------------------------------------------------------------------------------------------------------------------------------------------------------------------------------------------------------------------------------------------------------------------|-------------------------------------------------------------------------------------------------------------------------------------------------------------------------------------------------------------------------------------------------------------------------------------------------------------------------------------------------------------------------------------------------------------------------------------------------------------------------------------------------------------------------------------------------------------------------------------------------------------------------------------------------------------------------------------------------------------------------------------------------------------------------------------------------|
| <ul style="list-style-type: none"> <li>● Patients who meet all the following requirements</li> <li>● Patients diagnosed with coronary heart disease who met at least one of the following diagnostic criteria<sup>[1]</sup>:               <ol style="list-style-type: none"> <li>(1) a clear history of myocardial infarction (MI);</li> <li>(2) prior coronary revascularization;</li> <li>(3) coronary angiography or coronary angiography suggesting at least one coronary artery stenosis with catheter stenosis <math>\geq 50\%</math>;</li> <li>(4) cardiac magnetic resonance imaging or radionuclide myocardial perfusion imaging to confirm myocardial ischemia in the patient having coronary heart disease</li> </ol> </li> </ul> | <ul style="list-style-type: none"> <li>◆ Patients with cardiac function class IV (New York Heart Association cardiac function grading); or patients at a high risk of UA short-term risk stratification</li> <li>◆ Patients with uncontrolled grade III hypertension having systolic blood pressure <math>\geq 180</math> mm Hg and/or diastolic blood pressure <math>\geq 110</math> mm Hg; severe cardiopulmonary insufficiency; severe arrhythmia; severe primary diseases of the liver, kidney, and hematopoietic system; or serious diseases (such as tumors) and mental diseases</li> <li>◆ Patients also having other clinical conditions that might increase the risk of bleeding, such as a history of important organ bleeding in the last 6 months (such as intracerebral</li> </ul> |

|                                                                                                                                                                                                                                                                                                                                                                                                                                                                                                                                                                                                                                                                                                                                                     |                                                                                                                                                                                                                                                                                                                                                                                                                                                                                                                                                                                                                                                                                                                                                                                                                                                                                                                                                                                                                                                                                                                                                                                                                                                    |
|-----------------------------------------------------------------------------------------------------------------------------------------------------------------------------------------------------------------------------------------------------------------------------------------------------------------------------------------------------------------------------------------------------------------------------------------------------------------------------------------------------------------------------------------------------------------------------------------------------------------------------------------------------------------------------------------------------------------------------------------------------|----------------------------------------------------------------------------------------------------------------------------------------------------------------------------------------------------------------------------------------------------------------------------------------------------------------------------------------------------------------------------------------------------------------------------------------------------------------------------------------------------------------------------------------------------------------------------------------------------------------------------------------------------------------------------------------------------------------------------------------------------------------------------------------------------------------------------------------------------------------------------------------------------------------------------------------------------------------------------------------------------------------------------------------------------------------------------------------------------------------------------------------------------------------------------------------------------------------------------------------------------|
| <ul style="list-style-type: none"> <li>● Patients complying with the diagnosis of UA and having at least one of the following conditions: <ul style="list-style-type: none"> <li>(1) electrocardiograph with a transient or persistent ST-segment depression of 0.1 mV and even more on one or more leads;</li> <li>(2) Thrombolysis In Myocardial Infarction (TIMI) risk score<sup>[18]</sup> <math>\geq 3</math></li> </ul> </li> <li>● Patients receiving dual antiplatelet therapy (aspirin + clopidogrel)</li> <li>● Patients aged 40–75 years, irrespective of sex</li> <li>● Patients willing to accept the drug treatment and provide written informed consent, conforming to the relevant regulations of Good Clinical Practice</li> </ul> | <p>hemorrhage and upper gastrointestinal bleeding), decreased platelet count, abnormal coagulation function, and recent active bleeding</p> <ul style="list-style-type: none"> <li>◆ Patients with abnormal function indexes of the liver and kidney [blood alanine aminotransferase (ALT) and aspartate aminotransferase (AST) level more than two times the upper normal reference range; glomerular filtration rate (GFR) <math>&lt; 60 \text{ mL}/(\text{min} \times 1.73 \text{ m}^2)</math>]. Simplified Modification of Diet in Renal Disease formula: <math>\text{GFR} [\text{mL}/(\text{min} \times 1.73 \text{ m}^2)] = 186.3 \times \text{serum creatinine (Scr)}^{-1.154} \times (\text{age})^{-0.203} \times (0.742 \text{ female})</math>; Scr in mg/dL and age in years</li> <li>◆ Patients who planned to undergo revascularization [PCI or coronary artery bypass grafting (CABG)] recently</li> <li>◆ Patients allergic to a variety of foods, or with known allergy to study drugs, including their components</li> <li>◆ Patients pregnant, preparing for pregnancy, or lactating</li> <li>◆ Patients participating in other clinical trials during the same period</li> <li>◆ Patients considered inappropriate to</li> </ul> |
|-----------------------------------------------------------------------------------------------------------------------------------------------------------------------------------------------------------------------------------------------------------------------------------------------------------------------------------------------------------------------------------------------------------------------------------------------------------------------------------------------------------------------------------------------------------------------------------------------------------------------------------------------------------------------------------------------------------------------------------------------------|----------------------------------------------------------------------------------------------------------------------------------------------------------------------------------------------------------------------------------------------------------------------------------------------------------------------------------------------------------------------------------------------------------------------------------------------------------------------------------------------------------------------------------------------------------------------------------------------------------------------------------------------------------------------------------------------------------------------------------------------------------------------------------------------------------------------------------------------------------------------------------------------------------------------------------------------------------------------------------------------------------------------------------------------------------------------------------------------------------------------------------------------------------------------------------------------------------------------------------------------------|

|  |                           |
|--|---------------------------|
|  | participate in this study |
|--|---------------------------|

Table 2. Study schedule of assessments

Abbreviations: CK-MB, creatine kinase MB; MACE, major adverse cardiac events; cTn, cardiac troponin; hsTn, high-sensitivity Troponin; UA, unstable angina.

|                       | Study period |            |              |                   |
|-----------------------|--------------|------------|--------------|-------------------|
|                       | Enrollment   | Allocation | Intervention | Follow-up         |
| Time point            | -3 ~ 0 days  | 0          | 7 ~ 14 days  | 1, 3 and 6 months |
| <b>ENROLLMENT:</b>    | <b>X</b>     |            |              |                   |
| Eligibility screen    | <b>X</b>     |            |              |                   |
| Informed consent      | <b>X</b>     |            |              |                   |
| Allocation            |              | <b>X</b>   |              |                   |
| <b>INTERVENTIONS:</b> |              |            |              |                   |
| SXT treatment         |              |            | <b>X</b>     |                   |
| Placebo treatment     |              |            | <b>X</b>     |                   |
| <b>ASSESSMENTS:</b>   |              |            |              |                   |
| MACE                  |              |            | <b>X</b>     | <b>X</b>          |



|    |                |  |          |          |
|----|----------------|--|----------|----------|
| 1  |                |  |          |          |
| 2  |                |  |          |          |
| 3  |                |  |          |          |
| 4  | CK-MB          |  | <b>X</b> | <b>X</b> |
| 5  |                |  |          |          |
| 6  |                |  |          |          |
| 7  | cTnT           |  | <b>X</b> | <b>X</b> |
| 8  |                |  |          |          |
| 9  |                |  |          |          |
| 10 | cTnI           |  | <b>X</b> | <b>X</b> |
| 11 |                |  |          |          |
| 12 |                |  |          |          |
| 13 | hsTnI          |  | <b>X</b> | <b>X</b> |
| 14 |                |  |          |          |
| 15 |                |  |          |          |
| 16 |                |  |          |          |
| 17 | Adverse events |  | <b>X</b> | <b>X</b> |
| 18 |                |  |          |          |
| 19 |                |  |          |          |
| 20 |                |  |          |          |
| 21 |                |  |          |          |
| 22 |                |  |          |          |
| 23 |                |  |          |          |
| 24 |                |  |          |          |
| 25 |                |  |          |          |
| 26 |                |  |          |          |
| 27 |                |  |          |          |
| 28 |                |  |          |          |
| 29 |                |  |          |          |
| 30 |                |  |          |          |
| 31 |                |  |          |          |
| 32 |                |  |          |          |
| 33 |                |  |          |          |
| 34 |                |  |          |          |
| 35 |                |  |          |          |
| 36 |                |  |          |          |
| 37 |                |  |          |          |
| 38 |                |  |          |          |
| 39 |                |  |          |          |
| 40 |                |  |          |          |
| 41 |                |  |          |          |
| 42 |                |  |          |          |
| 43 |                |  |          |          |
| 44 |                |  |          |          |
| 45 |                |  |          |          |
| 46 |                |  |          |          |
| 47 |                |  |          |          |
| 48 |                |  |          |          |
| 49 |                |  |          |          |
| 50 |                |  |          |          |
| 51 |                |  |          |          |
| 52 |                |  |          |          |
| 53 |                |  |          |          |
| 54 |                |  |          |          |
| 55 |                |  |          |          |
| 56 |                |  |          |          |
| 57 |                |  |          |          |
| 58 |                |  |          |          |
| 59 |                |  |          |          |
| 60 |                |  |          |          |

For peer review only

1  
2  
3  
4  
5  
6  
7  
8  
9  
10  
11  
12  
13  
14  
15  
16  
17  
18  
19  
20  
21  
22  
23  
24  
25  
26  
27  
28  
29  
30  
31  
32  
33  
34  
35  
36  
37  
38  
39  
40  
41  
42  
43  
44  
45  
46  
47  
48  
49  
50  
51  
52  
53  
54  
55  
56  
57  
58  
59  
60

**Figure legends**

Figure 1. Flowchart of the study procedure.

For peer review only

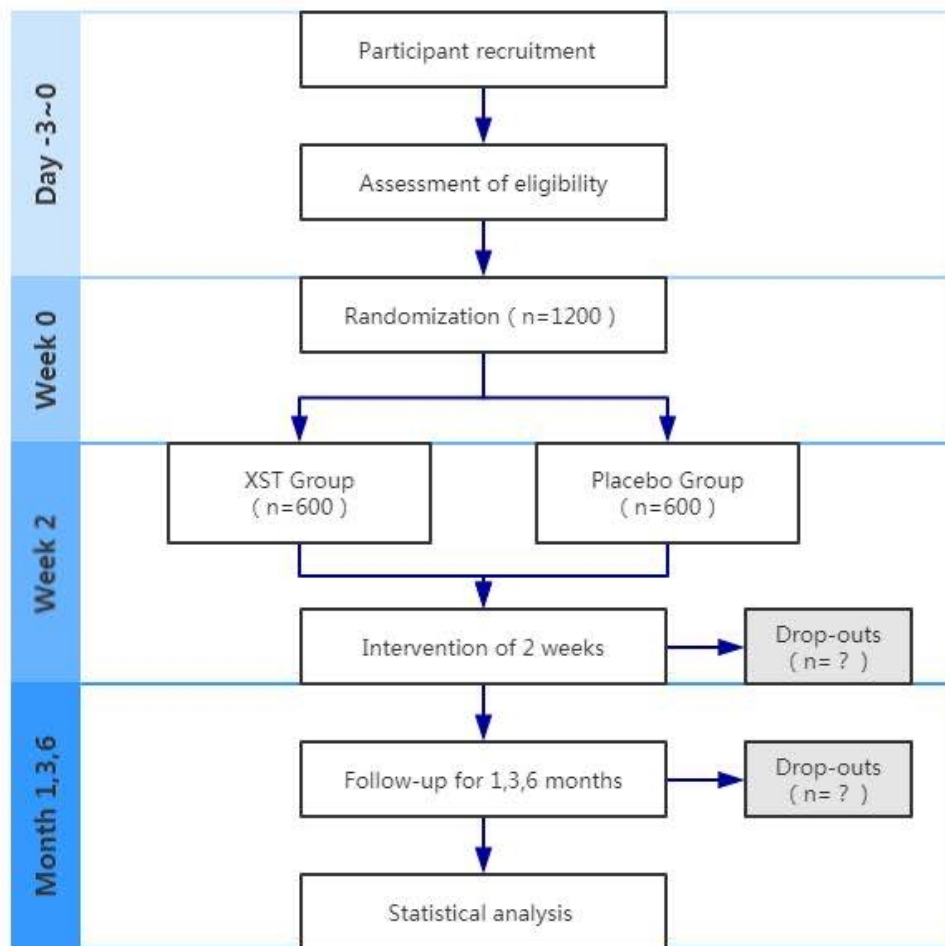

159x155mm (96 x 96 DPI)

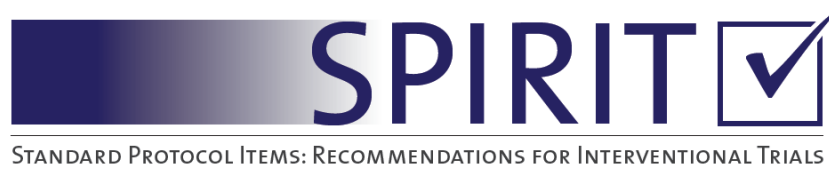

SPIRIT 2013 Checklist: Recommended items to address in a clinical trial protocol and related documents\*

| Section/item                      | Item No | Description                                                                                                                                                                                                                                                                              | Reported on page No |
|-----------------------------------|---------|------------------------------------------------------------------------------------------------------------------------------------------------------------------------------------------------------------------------------------------------------------------------------------------|---------------------|
| <b>Administrative information</b> |         |                                                                                                                                                                                                                                                                                          |                     |
| Title                             | 1       | Descriptive title identifying the study design, population, interventions, and, if applicable, trial acronym                                                                                                                                                                             | 1                   |
| Trial registration                | 2a      | Trial identifier and registry name. If not yet registered, name of intended registry                                                                                                                                                                                                     | 4                   |
|                                   | 2b      | All items from the World Health Organization Trial Registration Data Set                                                                                                                                                                                                                 | 4                   |
| Protocol version                  | 3       | Date and version identifier                                                                                                                                                                                                                                                              | 4                   |
| Funding                           | 4       | Sources and types of financial, material, and other support                                                                                                                                                                                                                              | 17                  |
| Roles and responsibilities        | 5a      | Names, affiliations, and roles of protocol contributors                                                                                                                                                                                                                                  | 1,2,17              |
|                                   | 5b      | Name and contact information for the trial sponsor                                                                                                                                                                                                                                       | 17                  |
|                                   | 5c      | Role of study sponsor and funders, if any, in study design; collection, management, analysis, and interpretation of data; writing of the report; and the decision to submit the report for publication, including whether they will have ultimate authority over any of these activities | 17-18               |
|                                   | 5d      | Composition, roles, and responsibilities of the coordinating centre, steering committee, endpoint adjudication committee, data management team, and other individuals or groups overseeing the trial, if applicable (see Item 21a for data monitoring committee)                         | 17                  |
| <b>Introduction</b>               |         |                                                                                                                                                                                                                                                                                          |                     |
| Background and rationale          | 6a      | Description of research question and justification for undertaking the trial, including summary of relevant studies (published and unpublished) examining benefits and harms for each intervention                                                                                       | 5,6                 |
|                                   | 6b      | Explanation for choice of comparators                                                                                                                                                                                                                                                    | 5,6                 |
| Objectives                        | 7       | Specific objectives or hypotheses                                                                                                                                                                                                                                                        | 5,6                 |

|    |                                                                     |     |                                                                                                                                                                                                                                                                                                                                                                                |              |
|----|---------------------------------------------------------------------|-----|--------------------------------------------------------------------------------------------------------------------------------------------------------------------------------------------------------------------------------------------------------------------------------------------------------------------------------------------------------------------------------|--------------|
| 1  |                                                                     |     |                                                                                                                                                                                                                                                                                                                                                                                |              |
| 2  | Trial design                                                        | 8   | Description of trial design including type of trial (eg, parallel group, crossover, factorial, single group), allocation ratio, and framework (eg, superiority, equivalence, noninferiority, exploratory)                                                                                                                                                                      | 6            |
| 3  |                                                                     |     |                                                                                                                                                                                                                                                                                                                                                                                |              |
| 4  |                                                                     |     |                                                                                                                                                                                                                                                                                                                                                                                |              |
| 5  |                                                                     |     |                                                                                                                                                                                                                                                                                                                                                                                |              |
| 6  |                                                                     |     |                                                                                                                                                                                                                                                                                                                                                                                |              |
| 7  |                                                                     |     |                                                                                                                                                                                                                                                                                                                                                                                |              |
| 8  | <b>Methods: Participants, interventions, and outcomes</b>           |     |                                                                                                                                                                                                                                                                                                                                                                                |              |
| 9  |                                                                     |     |                                                                                                                                                                                                                                                                                                                                                                                |              |
| 10 | Study setting                                                       | 9   | Description of study settings (eg, community clinic, academic hospital) and list of countries where data will be collected. Reference to where list of study sites can be obtained                                                                                                                                                                                             | 6-7          |
| 11 |                                                                     |     |                                                                                                                                                                                                                                                                                                                                                                                |              |
| 12 |                                                                     |     |                                                                                                                                                                                                                                                                                                                                                                                |              |
| 13 |                                                                     |     |                                                                                                                                                                                                                                                                                                                                                                                |              |
| 14 | Eligibility criteria                                                | 10  | Inclusion and exclusion criteria for participants. If applicable, eligibility criteria for study centres and individuals who will perform the interventions (eg, surgeons, psychotherapists)                                                                                                                                                                                   | 7-8<br>21-22 |
| 15 |                                                                     |     |                                                                                                                                                                                                                                                                                                                                                                                |              |
| 16 |                                                                     |     |                                                                                                                                                                                                                                                                                                                                                                                |              |
| 17 |                                                                     |     |                                                                                                                                                                                                                                                                                                                                                                                |              |
| 18 |                                                                     |     |                                                                                                                                                                                                                                                                                                                                                                                |              |
| 19 | Interventions                                                       | 11a | Interventions for each group with sufficient detail to allow replication, including how and when they will be administered                                                                                                                                                                                                                                                     | 7-8          |
| 20 |                                                                     |     |                                                                                                                                                                                                                                                                                                                                                                                |              |
| 21 |                                                                     |     |                                                                                                                                                                                                                                                                                                                                                                                |              |
| 22 |                                                                     | 11b | Criteria for discontinuing or modifying allocated interventions for a given trial participant (eg, drug dose change in response to harms, participant request, or improving/worsening disease)                                                                                                                                                                                 | 11-12        |
| 23 |                                                                     |     |                                                                                                                                                                                                                                                                                                                                                                                |              |
| 24 |                                                                     |     |                                                                                                                                                                                                                                                                                                                                                                                |              |
| 25 |                                                                     |     |                                                                                                                                                                                                                                                                                                                                                                                |              |
| 26 |                                                                     | 11c | Strategies to improve adherence to intervention protocols, and any procedures for monitoring adherence (eg, drug tablet return, laboratory tests)                                                                                                                                                                                                                              | 11-12        |
| 27 |                                                                     |     |                                                                                                                                                                                                                                                                                                                                                                                |              |
| 28 |                                                                     |     |                                                                                                                                                                                                                                                                                                                                                                                |              |
| 29 |                                                                     |     |                                                                                                                                                                                                                                                                                                                                                                                |              |
| 30 |                                                                     |     |                                                                                                                                                                                                                                                                                                                                                                                |              |
| 31 |                                                                     | 11d | Relevant concomitant care and interventions that are permitted or prohibited during the trial                                                                                                                                                                                                                                                                                  | 11-12        |
| 32 |                                                                     |     |                                                                                                                                                                                                                                                                                                                                                                                |              |
| 33 |                                                                     |     |                                                                                                                                                                                                                                                                                                                                                                                |              |
| 34 | Outcomes                                                            | 12  | Primary, secondary, and other outcomes, including the specific measurement variable (eg, systolic blood pressure), analysis metric (eg, change from baseline, final value, time to event), method of aggregation (eg, median, proportion), and time point for each outcome. Explanation of the clinical relevance of chosen efficacy and harm outcomes is strongly recommended | 12-13        |
| 35 |                                                                     |     |                                                                                                                                                                                                                                                                                                                                                                                |              |
| 36 |                                                                     |     |                                                                                                                                                                                                                                                                                                                                                                                |              |
| 37 |                                                                     |     |                                                                                                                                                                                                                                                                                                                                                                                |              |
| 38 |                                                                     |     |                                                                                                                                                                                                                                                                                                                                                                                |              |
| 39 |                                                                     |     |                                                                                                                                                                                                                                                                                                                                                                                |              |
| 40 |                                                                     |     |                                                                                                                                                                                                                                                                                                                                                                                |              |
| 41 |                                                                     |     |                                                                                                                                                                                                                                                                                                                                                                                |              |
| 42 | Participant timeline                                                | 13  | Time schedule of enrolment, interventions (including any run-ins and washouts), assessments, and visits for participants. A schematic diagram is highly recommended (see Figure)                                                                                                                                                                                               | 23-24        |
| 43 |                                                                     |     |                                                                                                                                                                                                                                                                                                                                                                                |              |
| 44 |                                                                     |     |                                                                                                                                                                                                                                                                                                                                                                                |              |
| 45 |                                                                     |     |                                                                                                                                                                                                                                                                                                                                                                                |              |
| 46 |                                                                     |     |                                                                                                                                                                                                                                                                                                                                                                                |              |
| 47 | Sample size                                                         | 14  | Estimated number of participants needed to achieve study objectives and how it was determined, including clinical and statistical assumptions supporting any sample size calculations                                                                                                                                                                                          | 23-24        |
| 48 |                                                                     |     |                                                                                                                                                                                                                                                                                                                                                                                |              |
| 49 |                                                                     |     |                                                                                                                                                                                                                                                                                                                                                                                |              |
| 50 |                                                                     |     |                                                                                                                                                                                                                                                                                                                                                                                |              |
| 51 | Recruitment                                                         | 15  | Strategies for achieving adequate participant enrolment to reach target sample size                                                                                                                                                                                                                                                                                            | 9-10         |
| 52 |                                                                     |     |                                                                                                                                                                                                                                                                                                                                                                                |              |
| 53 |                                                                     |     |                                                                                                                                                                                                                                                                                                                                                                                |              |
| 54 | <b>Methods: Assignment of interventions (for controlled trials)</b> |     |                                                                                                                                                                                                                                                                                                                                                                                |              |
| 55 |                                                                     |     |                                                                                                                                                                                                                                                                                                                                                                                |              |
| 56 | Allocation:                                                         |     |                                                                                                                                                                                                                                                                                                                                                                                |              |
| 57 |                                                                     |     |                                                                                                                                                                                                                                                                                                                                                                                |              |
| 58 |                                                                     |     |                                                                                                                                                                                                                                                                                                                                                                                |              |
| 59 |                                                                     |     |                                                                                                                                                                                                                                                                                                                                                                                |              |
| 60 |                                                                     |     |                                                                                                                                                                                                                                                                                                                                                                                |              |

|    |                |     |                                                                         |       |
|----|----------------|-----|-------------------------------------------------------------------------|-------|
| 1  |                |     |                                                                         |       |
| 2  | Sequence       | 16a | Method of generating the allocation sequence (eg, computer-             | 10-11 |
| 3  | generation     |     | generated random numbers), and list of any factors for stratification.  |       |
| 4  |                |     | To reduce predictability of a random sequence, details of any planned   |       |
| 5  |                |     | restriction (eg, blocking) should be provided in a separate document    |       |
| 6  |                |     | that is unavailable to those who enrol participants or assign           |       |
| 7  |                |     | interventions                                                           |       |
| 8  |                |     |                                                                         |       |
| 9  |                |     |                                                                         |       |
| 10 | Allocation     | 16b | Mechanism of implementing the allocation sequence (eg, central          | 10-11 |
| 11 | concealment    |     | telephone; sequentially numbered, opaque, sealed envelopes),            |       |
| 12 | mechanism      |     | describing any steps to conceal the sequence until interventions are    |       |
| 13 |                |     | assigned                                                                |       |
| 14 |                |     |                                                                         |       |
| 15 | Implementation | 16c | Who will generate the allocation sequence, who will enrol participants, | 10-11 |
| 16 |                |     | and who will assign participants to interventions                       |       |
| 17 |                |     |                                                                         |       |
| 18 |                |     |                                                                         |       |
| 19 | Blinding       | 17a | Who will be blinded after assignment to interventions (eg, trial        | 10-11 |
| 20 | (masking)      |     | participants, care providers, outcome assessors, data analysts), and    |       |
| 21 |                |     | how                                                                     |       |
| 22 |                |     |                                                                         |       |
| 23 |                | 17b | If blinded, circumstances under which unblinding is permissible, and    | 10-11 |
| 24 |                |     | procedure for revealing a participant's allocated intervention during   |       |
| 25 |                |     | the trial                                                               |       |
| 26 |                |     |                                                                         |       |
| 27 |                |     |                                                                         |       |

### Methods: Data collection, management, and analysis

|    |                 |     |                                                                          |       |
|----|-----------------|-----|--------------------------------------------------------------------------|-------|
| 28 |                 |     |                                                                          |       |
| 29 |                 |     |                                                                          |       |
| 30 | Data collection | 18a | Plans for assessment and collection of outcome, baseline, and other      | 13    |
| 31 | methods         |     | trial data, including any related processes to promote data quality (eg, |       |
| 32 |                 |     | duplicate measurements, training of assessors) and a description of      |       |
| 33 |                 |     | study instruments (eg, questionnaires, laboratory tests) along with      |       |
| 34 |                 |     | their reliability and validity, if known. Reference to where data        |       |
| 35 |                 |     | collection forms can be found, if not in the protocol                    |       |
| 36 |                 |     |                                                                          |       |
| 37 |                 |     |                                                                          |       |
| 38 |                 | 18b | Plans to promote participant retention and complete follow-up,           | 15    |
| 39 |                 |     | including list of any outcome data to be collected for participants who  |       |
| 40 |                 |     | discontinue or deviate from intervention protocols                       |       |
| 41 |                 |     |                                                                          |       |
| 42 | Data            | 19  | Plans for data entry, coding, security, and storage, including any       | 13,15 |
| 43 | management      |     | related processes to promote data quality (eg, double data entry;        |       |
| 44 |                 |     | range checks for data values). Reference to where details of data        |       |
| 45 |                 |     | management procedures can be found, if not in the protocol               |       |
| 46 |                 |     |                                                                          |       |
| 47 |                 |     |                                                                          |       |
| 48 | Statistical     | 20a | Statistical methods for analysing primary and secondary outcomes.        | 15    |
| 49 | methods         |     | Reference to where other details of the statistical analysis plan can be |       |
| 50 |                 |     | found, if not in the protocol                                            |       |
| 51 |                 |     |                                                                          |       |
| 52 |                 | 20b | Methods for any additional analyses (eg, subgroup and adjusted           | 15    |
| 53 |                 |     | analyses)                                                                |       |
| 54 |                 |     |                                                                          |       |
| 55 |                 | 20c | Definition of analysis population relating to protocol non-adherence     | 15    |
| 56 |                 |     | (eg, as randomised analysis), and any statistical methods to handle      |       |
| 57 |                 |     | missing data (eg, multiple imputation)                                   |       |
| 58 |                 |     |                                                                          |       |
| 59 |                 |     |                                                                          |       |
| 60 |                 |     |                                                                          |       |

## Methods: Monitoring

|                 |     |                                                                                                                                                                                                                                                                                                                                       |    |
|-----------------|-----|---------------------------------------------------------------------------------------------------------------------------------------------------------------------------------------------------------------------------------------------------------------------------------------------------------------------------------------|----|
| Data monitoring | 21a | Composition of data monitoring committee (DMC); summary of its role and reporting structure; statement of whether it is independent from the sponsor and competing interests; and reference to where further details about its charter can be found, if not in the protocol. Alternatively, an explanation of why a DMC is not needed | 17 |
|                 | 21b | Description of any interim analyses and stopping guidelines, including who will have access to these interim results and make the final decision to terminate the trial                                                                                                                                                               | 17 |
| Harms           | 22  | Plans for collecting, assessing, reporting, and managing solicited and spontaneously reported adverse events and other unintended effects of trial interventions or trial conduct                                                                                                                                                     | 17 |
| Auditing        | 23  | Frequency and procedures for auditing trial conduct, if any, and whether the process will be independent from investigators and the sponsor                                                                                                                                                                                           | 17 |

## Ethics and dissemination

|                               |     |                                                                                                                                                                                                                                  |      |
|-------------------------------|-----|----------------------------------------------------------------------------------------------------------------------------------------------------------------------------------------------------------------------------------|------|
| Research ethics approval      | 24  | Plans for seeking research ethics committee/institutional review board (REC/IRB) approval                                                                                                                                        | 8    |
| Protocol amendments           | 25  | Plans for communicating important protocol modifications (eg, changes to eligibility criteria, outcomes, analyses) to relevant parties (eg, investigators, REC/IRBs, trial participants, trial registries, journals, regulators) | 8    |
| Consent or assent             | 26a | Who will obtain informed consent or assent from potential trial participants or authorised surrogates, and how (see Item 32)                                                                                                     | 8    |
|                               | 26b | Additional consent provisions for collection and use of participant data and biological specimens in ancillary studies, if applicable                                                                                            | NA   |
| Confidentiality               | 27  | How personal information about potential and enrolled participants will be collected, shared, and maintained in order to protect confidentiality before, during, and after the trial                                             | 8,17 |
| Declaration of interests      | 28  | Financial and other competing interests for principal investigators for the overall trial and each study site                                                                                                                    | 18   |
| Access to data                | 29  | Statement of who will have access to the final trial dataset, and disclosure of contractual agreements that limit such access for investigators                                                                                  | 17   |
| Ancillary and post-trial care | 30  | Provisions, if any, for ancillary and post-trial care, and for compensation to those who suffer harm from trial participation                                                                                                    | NA   |

|    |               |     |                                                                              |    |
|----|---------------|-----|------------------------------------------------------------------------------|----|
| 1  |               |     |                                                                              |    |
| 2  | Dissemination | 31a | Plans for investigators and sponsor to communicate trial results to          | NA |
| 3  | policy        |     | participants, healthcare professionals, the public, and other relevant       |    |
| 4  |               |     | groups (eg, via publication, reporting in results databases, or other        |    |
| 5  |               |     | data sharing arrangements), including any publication restrictions           |    |
| 6  |               |     |                                                                              |    |
| 7  |               | 31b | Authorship eligibility guidelines and any intended use of professional       | 17 |
| 8  |               |     | writers                                                                      |    |
| 9  |               |     |                                                                              |    |
| 10 |               | 31c | Plans, if any, for granting public access to the full protocol, participant- | NA |
| 11 |               |     | level dataset, and statistical code                                          |    |
| 12 |               |     |                                                                              |    |
| 13 |               |     |                                                                              |    |

## Appendices

|    |                  |    |                                                                          |    |
|----|------------------|----|--------------------------------------------------------------------------|----|
| 14 |                  |    |                                                                          |    |
| 15 |                  |    |                                                                          |    |
| 16 | Informed consent | 32 | Model consent form and other related documentation given to              | NA |
| 17 | materials        |    | participants and authorised surrogates                                   |    |
| 18 |                  |    |                                                                          |    |
| 19 | Biological       | 33 | Plans for collection, laboratory evaluation, and storage of biological   | NA |
| 20 | specimens        |    | specimens for genetic or molecular analysis in the current trial and for |    |
| 21 |                  |    | future use in ancillary studies, if applicable                           |    |
| 22 |                  |    |                                                                          |    |

---

\*It is strongly recommended that this checklist be read in conjunction with the SPIRIT 2013 Explanation & Elaboration for important clarification on the items. Amendments to the protocol should be tracked and dated. The SPIRIT checklist is copyrighted by the SPIRIT Group under the Creative Commons "[Attribution-NonCommercial-NoDerivs 3.0 Unported](https://creativecommons.org/licenses/by-nc-nd/3.0/)" license.



# BMJ Open

## **Efficacy and safety of High-Dose Xueshuantong injection (lyophilized) in reducing the incidence of major adverse cardiovascular events in patients with unstable angina: A protocol of a randomized, parallel-arm, controlled, double-blind, and multicenter clinical trial based on dual antiplatelet therapy**

|                                 |                                                                                                                                                                                                                                                                                                                                                                                                                                                                                                                                                                                                                                                                                                                                                                                                                                                                                                                                                                                                                                                                                                                                                                                                                                                                                                                                                                                                                                                                                                                                                                                                                                                                                                                                                                                                             |
|---------------------------------|-------------------------------------------------------------------------------------------------------------------------------------------------------------------------------------------------------------------------------------------------------------------------------------------------------------------------------------------------------------------------------------------------------------------------------------------------------------------------------------------------------------------------------------------------------------------------------------------------------------------------------------------------------------------------------------------------------------------------------------------------------------------------------------------------------------------------------------------------------------------------------------------------------------------------------------------------------------------------------------------------------------------------------------------------------------------------------------------------------------------------------------------------------------------------------------------------------------------------------------------------------------------------------------------------------------------------------------------------------------------------------------------------------------------------------------------------------------------------------------------------------------------------------------------------------------------------------------------------------------------------------------------------------------------------------------------------------------------------------------------------------------------------------------------------------------|
| Journal:                        | <i>BMJ Open</i>                                                                                                                                                                                                                                                                                                                                                                                                                                                                                                                                                                                                                                                                                                                                                                                                                                                                                                                                                                                                                                                                                                                                                                                                                                                                                                                                                                                                                                                                                                                                                                                                                                                                                                                                                                                             |
| Manuscript ID                   | bmjopen-2020-038074.R2                                                                                                                                                                                                                                                                                                                                                                                                                                                                                                                                                                                                                                                                                                                                                                                                                                                                                                                                                                                                                                                                                                                                                                                                                                                                                                                                                                                                                                                                                                                                                                                                                                                                                                                                                                                      |
| Article Type:                   | Protocol                                                                                                                                                                                                                                                                                                                                                                                                                                                                                                                                                                                                                                                                                                                                                                                                                                                                                                                                                                                                                                                                                                                                                                                                                                                                                                                                                                                                                                                                                                                                                                                                                                                                                                                                                                                                    |
| Date Submitted by the Author:   | 10-Jul-2020                                                                                                                                                                                                                                                                                                                                                                                                                                                                                                                                                                                                                                                                                                                                                                                                                                                                                                                                                                                                                                                                                                                                                                                                                                                                                                                                                                                                                                                                                                                                                                                                                                                                                                                                                                                                 |
| Complete List of Authors:       | <p>Long, Wenjie; Guangzhou University of Traditional Chinese Medicine First Affiliated Hospital; Guangzhou University of Chinese Medicine, Lingnan Medical Research Center</p> <p>Liao, Huili; Guangzhou University of Traditional Chinese Medicine First Affiliated Hospital, Department of Geriatrics,</p> <p>Huang , Xi ; Guangzhou University of Chinese Medicine, The First Clinical College</p> <p>Liu, Qingqing; Guangzhou University of Chinese Medicine, The First Clinical College,</p> <p>Tang, Yaqing ; Guangzhou University of Traditional Chinese Medicine First Affiliated Hospital, National Drug Clinical Trial Agency Office</p> <p>Lu, Liming; Guangzhou University of Chinese Medicine, Clinical Research Center</p> <p>Liu, Jianhong; Guangzhou University of Traditional Chinese Medicine First Affiliated Hospital, Department of Geriatrics</p> <p>Yuan, Tianhui ; Guangzhou University of Traditional Chinese Medicine First Affiliated Hospital, National Drug Clinical Trial Agency Office</p> <p>Ling, Yan ; Guangzhou University of Traditional Chinese Medicine First Affiliated Hospital, Department of Geriatrics</p> <p>Hong, Yu; Guangzhou University of Traditional Chinese Medicine First Affiliated Hospital, Department of Geriatrics</p> <p>Duan , Jiao ; Guangzhou University of Traditional Chinese Medicine First Affiliated Hospital, Department of Geriatrics</p> <p>Lin , Weiji ; Guangzhou University of Traditional Chinese Medicine First Affiliated Hospital, Department of Geriatrics</p> <p>Xian, Shaoxiang; Guangzhou University of Traditional Chinese Medicine First Affiliated Hospital, Department of Geriatrics</p> <p>Yang, Zhongqi; Guangzhou University of Traditional Chinese Medicine First Affiliated Hospital, Department of Geriatrics</p> |
| <b>Primary Subject Heading</b>: | Cardiovascular medicine                                                                                                                                                                                                                                                                                                                                                                                                                                                                                                                                                                                                                                                                                                                                                                                                                                                                                                                                                                                                                                                                                                                                                                                                                                                                                                                                                                                                                                                                                                                                                                                                                                                                                                                                                                                     |
| Secondary Subject Heading:      | Complementary medicine                                                                                                                                                                                                                                                                                                                                                                                                                                                                                                                                                                                                                                                                                                                                                                                                                                                                                                                                                                                                                                                                                                                                                                                                                                                                                                                                                                                                                                                                                                                                                                                                                                                                                                                                                                                      |
| Keywords:                       | CARDIOLOGY, Adult cardiology < CARDIOLOGY, Coronary heart disease                                                                                                                                                                                                                                                                                                                                                                                                                                                                                                                                                                                                                                                                                                                                                                                                                                                                                                                                                                                                                                                                                                                                                                                                                                                                                                                                                                                                                                                                                                                                                                                                                                                                                                                                           |

1  
2  
3  
4  
5  
6  
7  
8  
9  
10  
11  
12  
13  
14  
15  
16  
17  
18  
19  
20  
21  
22  
23  
24  
25  
26  
27  
28  
29  
30  
31  
32  
33  
34  
35  
36  
37  
38  
39  
40  
41  
42  
43  
44  
45  
46  
47  
48  
49  
50  
51  
52  
53  
54  
55  
56  
57  
58  
59  
60

|  |              |
|--|--------------|
|  | < CARDIOLOGY |
|  |              |

SCHOLARONE™  
Manuscripts

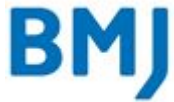

I, the Submitting Author has the right to grant and does grant on behalf of all authors of the Work (as defined in the below author licence), an exclusive licence and/or a non-exclusive licence for contributions from authors who are: i) UK Crown employees; ii) where BMJ has agreed a CC-BY licence shall apply, and/or iii) in accordance with the terms applicable for US Federal Government officers or employees acting as part of their official duties; on a worldwide, perpetual, irrevocable, royalty-free basis to BMJ Publishing Group Ltd ("BMJ") its licensees and where the relevant Journal is co-owned by BMJ to the co-owners of the Journal, to publish the Work in this journal and any other BMJ products and to exploit all rights, as set out in our [licence](#).

The Submitting Author accepts and understands that any supply made under these terms is made by BMJ to the Submitting Author unless you are acting as an employee on behalf of your employer or a postgraduate student of an affiliated institution which is paying any applicable article publishing charge ("APC") for Open Access articles. Where the Submitting Author wishes to make the Work available on an Open Access basis (and intends to pay the relevant APC), the terms of reuse of such Open Access shall be governed by a Creative Commons licence – details of these licences and which [Creative Commons](#) licence will apply to this Work are set out in our licence referred to above.

Other than as permitted in any relevant BMJ Author's Self Archiving Policies, I confirm this Work has not been accepted for publication elsewhere, is not being considered for publication elsewhere and does not duplicate material already published. I confirm all authors consent to publication of this Work and authorise the granting of this licence.

**Efficacy and safety of High-Dose Xueshuantong injection (lyophilized) in reducing the incidence of major adverse cardiovascular events in patients with unstable angina: A protocol of a randomized, parallel-arm, controlled, double-blind, and multicenter clinical trial based on dual antiplatelet therapy**

**Running title: Efficacy and safety of Xueshuantong injection in patients with UA**

Wenjie Long PhD<sup>1,3†</sup>, Huili Liao MD<sup>1†</sup>, Xi Huang MD<sup>2</sup>, Qingqing Liu MD<sup>2</sup>, Yaqing Tang MD<sup>4</sup>, Liming Lu PhD<sup>5</sup>, Jianhong Liu MD<sup>1</sup>, Tianhui Yuan MD<sup>4</sup>, Yan Ling PhD<sup>1</sup>, Yu Hong MD<sup>1</sup>, Jiao Duan MD<sup>1</sup>, Wei Ji Lin MD<sup>1</sup>, Shaoxiang Xian PhD<sup>1,3\*</sup>, Zhongqi Yang PhD<sup>1,3\*</sup>

<sup>1</sup> Department of Geriatrics, The First Affiliated Hospital of Guangzhou University of Chinese Medicine, No.16 Jichang Road, Baiyun District, Guangzhou, 510405, P.R. China

<sup>2</sup> The First Clinical College, Guangzhou University of Chinese Medicine, No.12 Jichang Road, Baiyun District, Guangzhou, 510405, P.R. China

<sup>3</sup> Lingnan Medical Research Center, Guangzhou University of Chinese Medicine, Jichang road No.12, Guangzhou, Guangdong 510000, China

<sup>4</sup> National Drug Clinical Trial Agency Office. The First Affiliated Hospital of Guangzhou University of Chinese Medicine, No.16 Jichang Road, Baiyun District, Guangzhou, 510405, P.R. China.

<sup>5</sup> Clinical Research Center, South China Research Center for Acupuncture and Moxibustion, Medical College of Acu-Moxi and Rehabilitation, Guangzhou University of Chinese Medicine, No.232 Waihuan Dong Road, Guangzhou, 510006,

1  
2  
3  
4 Guangdong, China.

5 † These authors contributed equally to this work.  
6  
7  
8  
9

10  
11 **\*Corresponding Author:**  
12

13  
14 Shaoxiang Xian

15  
16 Department of Geriatrics, The First Affiliated Hospital of Guangzhou University of  
17 Chinese Medicine, No.16 Jichang Road, Baiyun District, Guangzhou, 510405, P.R.  
18  
19 China  
20  
21

22  
23  
24 Lingnan Medical Research Center, Guangzhou University of Chinese Medicine,  
25  
26 Jichang road No.12, Guangzhou, Guangdong 510000, China  
27

28  
29 Tel: +86-18620602046

30  
31 Fax: +86-21-57643271

32  
33 E-mail: Shaoxiangx@hotmail.com  
34

35  
36  
37 Zhongqi Yang

38  
39 Department of Geriatrics, The First Affiliated Hospital of Guangzhou University of  
40 Chinese Medicine, No.16 Jichang Road, Baiyun District, Guangzhou, 510405, P.R.  
41  
42 China  
43  
44

45  
46 Lingnan Medical Research Center, Guangzhou University of Chinese Medicine,  
47  
48 Jichang road No.12, Guangzhou, Guangdong 510000, China  
49

50  
51 Tel: +86-13560231626

52  
53 Fax: +86-21-57643271  
54  
55  
56  
57  
58  
59  
60

E-mail: [Yang\\_zhongqi@163.com](mailto:Yang_zhongqi@163.com); [Yangzhongqi@gzucm.edu.cn](mailto:Yangzhongqi@gzucm.edu.cn)

### List of abbreviation

ACS, Acute coronary syndrome; ACEI, angiotensin-converting enzyme inhibitors; CABG, coronary artery bypass grafting; cTn, cardiac troponin; CK-MB, creatine kinase MB; HDL-C, low high-density lipoprotein cholesterol; LDL-C, high low-density lipoprotein cholesterol; MACE, major adverse cardiac events; PCI, percutaneous coronary intervention; STEMI, ST-segment elevation myocardial infarction; hsTn, high-sensitivity troponin; UA, unstable angina

## Abstract

**Introduction:** Unstable angina (UA), referred to as acute coronary syndrome (ACS), causes unexpected chest pain. Xueshuantong injection (lyophilized) (XST) is a traditional Chinese herbal injection having the potential to treat ACS. However, no clinical trial has been performed in this field. This clinical trial aims to examine the efficacy and safety of XST.

**Methods and Analysis:** This is a randomized, parallel-arm, controlled, double-blind, and multicenter clinical trial. A total of 1200 participants with UA will be enrolled in a 1:1 ratio, with 600 patients included in the XST treatment group and 600 with one-twentieth dose in the control group. The efficacy assessment and major adverse cardiovascular events (MACE) will be observed, and the frequency of angina attack, angina pectoris will be examined at the start and end of the run-in period. All AEs will be recorded, regardless of the severity, to assess the safety of XST. The baseline characteristics of patients will be summarized and compared using the *t* test or nonparametric statistical test. Qualitative data will be analyzed using the chi-square or Fisher exact tests, Cochran–Mantel–Hasenzel (CMH) test, and Wilcoxon test.

**Ethics and Dissemination:** This trial has been approved by the Research Ethics Committee of The First Affiliated Hospital of Guangzhou University of Chinese Medicine, China (approval number: ZYYEC [2017] 0021). Written informed consent will be obtained from all participants. The results of this trial will be disseminated to the public through academic conferences and peer-reviewed journals.

**Trial registration:** This study was registered on the Chinese Clinical Trial Registry (<http://www.chictr.org.cn/>) with the ID ChiCTR1800015911.

**Key words:** Acute coronary syndrome, clinical trial, traditional Chinese herbal injection, unstable angina

### Strengths and limitations of this study:

1. This is a randomized, parallel-arm, controlled, double-blind, and multicenter clinical trial.
2. The trial will be conducted in 17 medical centers with 1200 participants.

1  
2  
3  
4 3. In our study, to better implement the blind method, the extremely low dose  
5 25mg is used as the control group.  
6

7  
8 4. The efficacy assessment and major adverse cardiovascular events (MACE)  
9 will be observed, and the frequency of angina attack, angina pectorals will be  
10 examined at the start and end of the run-in period.  
11  
12

13 5. Our experiments will be conducted in different regions of China, and whether  
14 similar effects are available to other ethnic groups and regions remains uncertain.  
15  
16  
17  
18  
19  
20  
21  
22  
23  
24  
25  
26  
27  
28  
29  
30  
31  
32  
33  
34  
35  
36  
37  
38  
39  
40  
41  
42  
43  
44  
45  
46  
47  
48  
49  
50  
51  
52  
53  
54  
55  
56  
57  
58  
59  
60

For peer review only



## Introduction

Unstable angina (UA), referred to as acute coronary syndrome (ACS), causes unexpected chest pain. Reduced blood flow to the heart muscle is the most common cause of UA because the coronary arteries are narrowed by atherosclerosis, leading to the rupture of coronary blood vessels and hence blood clotting, which blocks the flow of blood to the heart muscle. The risk factors for UA include diabetes, obesity, family history of heart disease, high blood pressure, high low-density lipoprotein cholesterol, low high-density lipoprotein cholesterol, male sex, and use of any form of tobacco<sup>[1, 2]</sup>. With the wide application of percutaneous coronary intervention (PCI) in patients with ACS, current guidelines recommend potent platelet inhibition with prasugrel or ticagrelor for 12 months after ACS management with PCI. However, the greatest anti-ischemic benefit of potent antiplatelet drugs over the less-potent clopidogrel occurs early, while most excess bleeding events occur during chronic treatment. It is related to the efforts of physicians to reduce the adverse incidence of cardiovascular events, promote the patient's early recovery, and improve their health-related quality of life.

Xueshuantong injection (lyophilized) (XST) is a traditional Chinese herbal injection comprising a series of saponins extracted from *Panax notoginseng*. It has been approved by the China Food and Drug Administration (China drug approval number: Z 20025652) and collected according to the "2012 national essential drugs list" and People's Republic of China Pharmacopoeia, respectively. It has been reported to have anti-inflammatory effects that correct endothelial dysfunction *in vivo*<sup>[3]</sup> and *in vitro*<sup>[4]</sup>. Clinically, as a common medicine in China's Grade-A Tertiary Hospital, XST has been reported to be beneficial in treating ACS<sup>[5, 6]</sup>. In preliminary studies, including small samples, XST has been found to platelet aggregation inhibition, anti-myocardial ischemia, anti-inflammation, anti-oxidation, protecting endothelial cells, which could reduce the incidence of major adverse cardiovascular events (MACE)<sup>[7]</sup>. The recent study found that XST inhibits platelet activation and suppresses leukocytes adhesion

1  
2  
3  
4 to injured endothelial cells (ECs) under controlled shear stress in vitro, which not only  
5 dose-dependent and showed stronger anti-platelet activation and adhesion effect under  
6 low shear stress<sup>[8]</sup>. XST also played an effect in fighting against thrombosis induced  
7 by k-carrageenan in rats. High dose could significantly increase the microcirculatory  
8 blood flow perfusion of the tail and significantly inhibit platelet aggregation rate<sup>[9]</sup>.  
9 Besides, XST could significantly inhibit platelet piezo1 protein expression which may  
10 improve blood flow and antithrombotic. The Meta-analysis reported that  
11 Xueshuantong Injection combined with routine basic treatment (RBT) can alleviate  
12 unstable angina pectorals, especially for frequency...relief of angina, frequency  
13 reduction of nitroglycerin and the effective rate is more than 80%. It can significantly  
14 reduce blood high-sensitivity C-reactive protein(hs-CRP),  
15 fibrinogen(FIB) concentration<sup>[10]</sup>. As the primary component<sup>[11]</sup>, Panax notoginseng,  
16 has been extensively verified that it can ameliorate ischemia-reperfusion (IR)-induced  
17 injury in cardiovascular and neuronal systems mainly by upregulating the activity of  
18 estrogen receptor  $\alpha$ -dependent phosphoinositide 3-kinase (PI3K)/protein kinase B  
19 (AKT) and nuclear factor erythroid-2-related factor 2 (NRF2) pathways and  
20 downregulating nuclear factor- $\kappa$  B (NF- $\kappa$  B) and mitogen-activated protein kinase  
21 (MAPK) pathways. Therefore, high-quality trials and evidence are needed to prove  
22 the efficacy of XST. This randomized, parallel, controlled, double-blind, and  
23 multicenter clinical trial aims to examine the efficacy and safety of XST in patients  
24 with UA. The results of this trial may provide clinical evidence for treating patients  
25 with UA.  
26  
27  
28  
29  
30  
31  
32  
33  
34  
35  
36  
37  
38  
39  
40  
41  
42  
43  
44  
45  
46  
47  
48  
49

## 50 **2. Method and design**

### 51 **2.1 Study design**

52  
53  
54  
55 This randomized, parallel-arm, controlled, double-blind, and multicenter clinical  
56 trial will be conducted in 17 medical centers in China: The First Affiliated Hospital of  
57  
58  
59  
60

1  
2  
3  
4 Guangzhou University of Chinese Medicine, The First Affiliated Hospital of Henan  
5 University of Chinese Medicine, Luoyang No. 1 Hospital of Traditional Chinese  
6 Medicine, Shanxi Fenyang Hospital, The First Affiliated Hospital of Henan  
7 University of Science and Technology, Zhengzhou People's Hospital, Zhengzhou  
8 Central Hospital, Ruikang Hospital Affiliated to Guangxi University of Traditional  
9 Chinese Medicine, Nanjing Hospital of Chinese Medicine, Shuguang Hospital  
10 Affiliated to Shanghai University of Chinese Medicine, Changsha Fourth Hospital,  
11 The First Affiliated Hospital of Hunan University of Traditional Chinese Medicine,  
12 The Second Affiliated Hospital of Heilongjiang University of Traditional Chinese  
13 Medicine, The Second Affiliated Hospital of Tianjin University of Traditional  
14 Chinese Medicine, Affiliated Hospital of Tianjin Academy of Chinese Medicine,  
15 Tianjin Beichen District Hospital of Traditional Chinese Medicine, and Wenzhou  
16 Hospital of Traditional Chinese Medicine. A total of 1200 patients with UA who met  
17 the selection will be enrolled in a 1:1 ratio, with 600 patients included in the XST  
18 treatment group (high-dose, 500mg) and 600 in the control group (extremely low  
19 dose, 25mg).

20  
21  
22  
23  
24  
25  
26  
27  
28  
29  
30  
31  
32  
33  
34  
35  
36 All the visits will be recorded in electronic case report forms through the  
37 Electronic Data Capture system, which is accessed online via the Internet for data  
38 collection and management. The protocol for this study was developed in accordance  
39 with the standard protocol project: Interventional Trial Recommendations  
40 guidelines<sup>[12]</sup>.

## 41 42 43 44 45 46 47 48 49 **2.2 Ethics**

50  
51  
52  
53  
54  
55  
56  
57  
58  
59  
60  
This study has been approved by the ethics committee of the First Affiliated  
Hospital of Guangzhou University of Chinese Medicine (approval number:  
ZYYEC[2017]002) and 17 other medical centers: the Ethics Committee of Drug  
Clinical Trials of Zhengzhou People's Hospital (approval number: YW201800501) ,

1  
2  
3  
4 the Ethics Committee of Shanxi Fenyang Hospital (approval number: 2018002) , the  
5  
6 Ethics Committee of Ruikang Hospital Affiliated to Guangxi University of  
7  
8 Traditional Chinese Medicine (approval number: RK201709) , the Ethics Committee  
9  
10 of Changsha Fourth Hospital (approval number: CSSDSYY-LL-SC-2017-03-03) ,  
11  
12 the Ethics Committee of The First Affiliated Hospital of the Henan University of  
13  
14 Chinese Medicine (approval number: 2018HL-046-01) , the Ethics Committee of  
15  
16 the Second Affiliated Hospital of Heilongjiang University of Chinese Medicine  
17  
18 (approval number: 2015R000774), the Ethics Committee of The First Affiliated  
19  
20 Hospital of Hunan University of Traditional Chinese Medicine (approval number:  
21  
22 HN-LL-2017-018-01) , the Medical Ethics Committee of Luoyang NO.1 Hospital of  
23  
24 TCM (approval number: 2018-01), the Ethics Committee of Zhengzhou Central  
25  
26 Hospital (approval number: 2018-006-02), the Ethics Committee of Tianjin Beichen  
27  
28 District Hospital of Traditional Chinese Medicine (approval number:  
29  
30 BCZYK201901) , the Ethics Committee of Nanjing Hospital of Chinese Medicine  
31  
32 (approval number: 2017NJL033) , the Ethics Committee of Shuguang Hospital  
33  
34 Affiliated to Shanghai University of Chinese Medicine (approval number:  
35  
36 2017-563-46-01) , the Ethics Committee of Affiliated Hospital of Tianjin Academy  
37  
38 of Chinese Medicine (approval number: LLSY207-04) , the Ethics Committee of  
39  
40 The Second Affiliated Hospital of Tianjin University of Traditional Chinese Medicine  
41  
42 (approval number: EC.AT/03.19-02/08.0) , the Ethics Committee of The First  
43  
44 Affiliated Hospital of Henan University of Science and Technology (approval  
45  
46 number: 2018-0020) and the Ethics Committee of Wenzhou Hospital of Traditional  
47  
48 Chinese Medicine (approval number: WTCM-H-2017024-2018-002) .The trial has  
49  
50 been registered on the Chinese Clinical Trial Registry with the ID  
51  
52 ChiCTR1800015911.  
53  
54

### 55 **2.3 Patient and public involvement**

56  
57  
58 This clinical trial was designed to evaluate the efficacy and safety of high-dose  
59  
60

1  
2  
3  
4 XST in patients with UA. Clinically, XST has been found to be beneficial in treating  
5 ACS, which had been widely used in China's Grade-A Tertiary Hospital. More  
6 high-quality trials and evidence are needed to prove the efficacy of XST. The  
7 outcome measures used in this trial were considered as important endpoints in clinical  
8 practice. The participants in this trial will be recruited from 17 medical centers in  
9 China. However, patients were not directly involved in the design, recruitment, or  
10 conduct of the study. After the trial completes, the results of this study will be  
11 disseminated to the public through academic conferences and peer-reviewed journals.  
12 Once the manuscript is published, the results will be briefly summarized in a simple  
13 language and inform all trial participants through the telephone. The burden of  
14 intervention will not be assessed by the trial participants.  
15  
16  
17  
18  
19  
20  
21  
22  
23  
24  
25  
26  
27

## 28 **2.4 Study population**

29  
30 Patients will be included after written informed consent and enrolled in the study  
31 when the inclusion and exclusion criteria are met (Table 1).  
32  
33

### 34 **2.4.1 Withdrawal criteria**

- 35 1. Patients with some comorbidities, complications, or special physiological changes  
36 during the trial
- 37 2. Patients with poor compliance in the trial; the use of the drug not reaching 80%  
38 (except for those recovered in advance) or exceeding 120% of the prescribed  
39 amount
- 40 3. Patients with blindness or emergency unblinding during the trial
- 41 4. Patients with serious adverse events and those not appropriate to continue the test
- 42 5. Patients failing to use the test drug
- 43 6. Patients misdiagnosed or not matching the inclusion criteria and accidentally  
44 included
- 45 7. Patients with no follow-up records

- 1  
2  
3 8. Patients failing to comply with the treatment during the trial, changing medicines,  
4 or adding non specified therapeutic medications by themselves, especially those  
5 medications that may affect the evaluation of the test drug, affecting the validity  
6 and safety.  
7  
8  
9

## 10 11 12 13 14 **2.5 Study setting and recruitment**

15  
16 Between December 2018 and December 2020, 1200 outpatients or inpatient will  
17 be recruited at 17 centers mentioned earlier through the official website of the  
18 hospitals, posters, and networks. Physicians will diagnose the participants, and the  
19 research assistants will manage the recruitment.  
20  
21  
22  
23  
24  
25  
26

## 27 28 **2.6 Randomization**

29  
30 On the day of enrollment, statistical analysis system software will be used to  
31 generate the random arrangement of 1200 people in 2 groups (XST and placebo  
32 groups) with the method of central stratified regional group randomization. The  
33 randomization numbers will be kept in opaque sealed envelopes. Physicians and  
34 patients will not be aware of the grouping and intervention.  
35  
36  
37  
38  
39  
40  
41  
42  
43

## 44 45 **2.7 Blinding**

46 This study has a double-blind design. Because XST was lyophilized powder form  
47 in this study, which was a kind of white or light yellow amorphous powder or loose  
48 solid, and was dissolved with an appropriate amount of injection sodium chloride  
49 injection before use, there were color changes and a small amount of powder  
50 precipitation. Therefore, in order to better implement the blind method, an extremely  
51 low dose (25mg) was used as the control group, which is invalid for UA from our  
52  
53  
54  
55  
56  
57  
58  
59  
60

1  
2  
3  
4 previous pharmacokinetic experiment, did not increase the efficacy of the  
5  
6 experimental group.  
7

8 The number of cases in the study and control group will be in the ratio of  
9  
10 1:1. The blinding work will be completed by statisticians. To ensure the blinding of  
11  
12 investigators and participants to study treatment, the study drug or placebo will be  
13  
14 provided in identical packaging and labeling. Due to some natural variability in the  
15  
16 color of the study drug, which is batch dependent, the color of the placebo will match  
17  
18 the same as the average color of the study drug. Study drug and placebo will label  
19  
20 with a unique label letter that will be used to assign treatment to the patient but will  
21  
22 not indicate treatment allocation to investigators or participants. No member of the  
23  
24 study team and their extended staff, except for pharmacists and biostatisticians, will  
25  
26 have access to the randomization scheme during the conduct of the study. In the event  
27  
28 of a medical emergency, where breaking the blind is required to provide medical care  
29  
30 to the participant, the investigator will obtain the treatment assignment from the trial  
31  
32 pharmacists.  
33  
34  
35  
36

### 37 **2.8 Sample size calculation**

38  
39 MACE will be used as the effective index according to the statistical  
40  
41 requirements of the optimal validity test design.  
42  
43

44 Based on the expert advice combined with clinical practical considerations and  
45  
46 according to the loss rate of less than 20% estimated beforehand, the study sample  
47  
48 was 1200 cases (600 cases in each group), assuming that the incidence of MACE was  
49  
50 12% after dual antiplatelet therapy for 6 months, which was reduced by 6% after  
51  
52 lyophilization ( $\alpha = 0.05$ ; power = 0.9).  
53  
54  
55

### 56 **2.9 Interventions**

1  
2  
3  
4 All participants will receive dual antiplatelet therapy (aspirin 100 mg/d +  
5 clopidogrel 75 mg/d) and anticoagulation therapy (unfractionated heparin) according  
6 to the 2014 American College of Cardiology/American Heart Association Guidelines  
7 for the Diagnosis and Treatment of Non-ST-Segment Acute Coronary Syndrome, and  
8 in accordance with the guidelines to accept statins, angiotensin-converting enzyme  
9 inhibitors, beta-blockers, and nitrates. Patients with mild UA will undergo a  
10 standardized baseline assessment before the treatment, including detailed medical  
11 history, physical examination, and laboratory testing. Meanwhile, the following  
12 treatments will be given to different groups:  
13  
14  
15  
16  
17  
18  
19  
20

21  
22 (1) XST treatment group: The patients will be treated via an intravenous drip with  
23 500mg XST (lyophilized) diluted with 250–500 mL of 5% glucose injection or  
24 sodium chloride injection, once per day for 7–14 days.  
25  
26  
27

28 (2) Control group: The patients will be treated via an intravenous drip with 25mg  
29 XST (lyophilized) diluted with 250–500 mL of 5% glucose injection or sodium  
30 chloride injection, once per day for 7–14 days.  
31  
32  
33

34 The experimental drugs will be distributed by a drug administrator and injected by  
35 trained nurses.  
36  
37

38 Patients will be admitted to the hospital on the day of registration for the first  
39 intervention, and patients who discharge will move directly to the follow-up period.  
40 The efficacy and safety of XST will be assessed after treatment for 7–14 days and  
41 follow-up for 1, 3, and 6 months (Figs. 1 and Table 2).  
42  
43  
44  
45  
46  
47  
48

## 49 **2.10 Outcome measurements**

### 50 **2.10.1 Primary outcomes**

51  
52 The primary endpoints will include the incidence of the composite endpoints for  
53 MACE, which is a commonly used indicator to evaluate the prognosis of patients with  
54 coronary heart disease or UA <sup>[13]</sup>, including cardiovascular death, nonfatal myocardial  
55  
56  
57  
58  
59  
60



1  
2  
3  
4 infarction, and revascularization.  
5

6 The primary endpoint is the time of enrollment to the end of the study (including  
7 the medication observation period and follow-up period) when any of the MACE  
8 events occur for the first time. The researchers will record through telephone  
9 interviews, in-patient and outpatient medical records of patients, and information  
10 provided by their family members. Patients without MACE during the study will be  
11 defined as censored at the end of the study. For patients who quit the trial early due to  
12 reasons other than MACE, the time of occurrence is defined as censoring at the time  
13 of early termination. Death not due to cardiovascular diseases or that occurs after the  
14 MACE will not be evaluated.  
15  
16  
17  
18  
19  
20  
21  
22  
23  
24  
25  
26

### 27 **2.10.2 Secondary outcomes**

28 The efficacy of angina pectorals will be observed at the time of enrollment and by  
29 the end of treatment, including the frequency of angina attack, the clinical  
30 manifestations, ECG, and laboratory examination.  
31  
32  
33  
34  
35

36 Myocardial injury markers [serum creatine kinase MB; cardiac troponin T/cardiac  
37 troponin I (cTnI)/high-sensitivity troponin I] will be monitored, to observe changes in  
38 myocardial injury during treatment and to assess the efficacy and safety during  
39 treatment.  
40  
41  
42  
43  
44  
45  
46  
47  
48  
49

### 50 **2.10.3 Safety assessment**

51 An adverse event(AE) is any adverse medical event that occurs during the trial.  
52 The researchers will record the observation of vital signs, testing of blood and urine  
53 samples, renal and liver function at the start and end of the run-in period, and  
54 recorded abnormal changes and AEs at any time.  
55  
56  
57

58 In view of the particularity of the disease, the condition of the participants may  
59  
60

1  
2  
3  
4 change significantly during the observation, including the need for hospitalization for  
5 the deterioration of the disease, or even life-threatening. Since cardiovascular death,  
6 non-fatal myocardial infarction, and revascularization were the endpoints of this  
7 study, the above events would not be reported as serious adverse events (and  
8 described in the study history). Known adverse reaction of the XST: systemic injury:  
9 fever, chills, anaphylactic reaction, anaphylactic shock, etc.; respiratory system  
10 damage: chest tightness, breathing difficulties, shortness of breath, asthma, laryngeal  
11 edema, etc.; skin and its appendages damage: rash, pruritus, dermatitis  
12 exfoliating; heart rate and arrhythmia: palpitations, tachycardia, etc.; central and  
13 peripheral nervous system damage: dizziness, headache, convulsions, tremor, etc.;  
14 gastrointestinal system damage: nausea, vomiting, etc.; cardiovascular system  
15 damage: cyanosis, flushing, decreased blood pressure, elevated blood pressure, etc.;  
16 other damage: blood in the urine, abnormal liver function, etc.

17  
18  
19  
20  
21  
22  
23  
24  
25  
26  
27  
28  
29  
30  
31  
32  
33  
34  
35  
36  
37  
38  
39  
40  
41  
42  
43  
44  
45  
46  
47  
48  
49  
50  
51  
52  
53  
54  
55  
56  
57  
58  
59  
60  
Patients will be required to report all AEs at each visit. All AEs will be recorded, regardless of the severity, to assess the safety of XST.

If an AE occurs, the researchers will have to determine whether to stop the observation and proceed with the diagnosis and corresponding treatment. If any severe AE occurs, the researchers must take immediate action to ensure the safety of the participants. They must also report to the ethics committee within 24 h. The responsible staff from The First Affiliated Hospital of Guangzhou University of Chinese Medicine must promptly notify other participating centers and initiate any necessary legal procedures.

## 2.11 Follow-up

All included participants will be evaluated for the occurrence of MACE after 1, 3, and 6 months through phone calls after the end of the medication. The trial will be ended if the following endpoints occur: death, nonfatal myocardial infarction, or

1  
2  
3  
4 revascularization (including PCI and CABG). The academic research on hemorrhage  
5 in Europe and the United States proposed a unified definition of hemorrhage type 3–  
6  
7 5.  
8  
9

10 The occurrence of the MACE must be recorded in an original supporting  
11 document, including but not limited to a copy of the discharge summary, a copy of the  
12 medical record, or other documents that can be used to verify the occurrence of the  
13 MACE and the date of its occurrence.  
14  
15  
16  
17  
18  
19  
20

## 21 **2.12 Statistical analysis**

### 22 **2.12.1 Enrollment and case completion**

23  
24 The completion of the trial at each center must be recorded and described. All  
25 cases of shedding must be listed.  
26  
27  
28  
29

### 30 **2.12.2 Baseline comparability analysis**

31 The baseline characteristics of patients will be summarized and compared using  
32 the *t* test or nonparametric statistical test. Qualitative data will be analyzed using the  
33 chi-square or Fisher exact tests, Cochran–Mantel–Hasenszel (CMH) test, and  
34 Wilcoxon test.  
35  
36  
37  
38  
39  
40  
41

### 42 **2.12.3 Analysis of efficacy**

43  
44 (1) Baseline comparability analysis: This includes the description of demographic  
45 data, symptoms, and general conditions. The *t* test or nonparametric statistical method  
46 will be used for quantitative data. Qualitative data will be determined using the  
47 chi-square test, Fisher's exact probability method, CMH test, and Wilcoxon rank-sum  
48 test.  
49  
50  
51  
52  
53  
54

55 (2) Primary and secondary outcomes: The incidence of the composite endpoints  
56 for MACE and the efficacy of angina pectorals will be compared between the two  
57  
58  
59  
60

1  
2  
3  
4 groups and analyzed using the chi-square or Fisher exact tests and two-sample *t* tests  
5  
6 or Wilcoxon rank-sum test. The laboratory data on myocardial injury markers will be  
7  
8 analyzed for the changes before and after the intervention. The average value of each  
9  
10 laboratory data after the treatment will be compared.

11  
12 (3) For cases of rejection and shedding, statistical descriptions will be performed  
13  
14 one by one. Adverse reactions will be statistically described. The incidence of adverse  
15  
16 reactions will be compared using the chi-square or Fisher exact tests.

### 21 3. Discussion

22  
23  
24 XST is a traditional Chinese herbal injection consisting of a series of saponins  
25  
26 extracted from *Panax notoginseng*. It has been approved by the China Food and Drug  
27  
28 Administration (China drug approval number: Z 20025652) and collected according  
29  
30 to the “2012 national essential drugs list” and the People’s Republic of China  
31  
32 Pharmacopoeia, respectively. Total saponins, isolated from the root and rhizome of *P.*  
33  
34 *notoginseng*, are the main components of XST.

35  
36  
37 *P. notoginseng* is known for promoting blood circulation, preventing thrombosis,  
38  
39 and dilating blood vessels. It is widely applied to treat acute cerebral infarction,  
40  
41 stroke, and coronary heart disease in clinical practice<sup>[14, 15]</sup>. Wang et al.<sup>[16]</sup> found that in  
42  
43 a rat model of middle cerebral artery occlusion-reperfusion, administration of XST  
44  
45 combined with salvianolate lyophilized (SLI) injection not only significantly  
46  
47 decreased neurological deficit scores and infarct volumes, and increased regional  
48  
49 cerebral blood flow. Gan et al.<sup>[17]</sup> evaluated the efficacy and safety of the *P.*  
50  
51 *notoginseng* extract via intracoronary injection for treating the post-PCI slow-reflow  
52  
53 phenomenon in patients with ST-segment elevation myocardial infarction and its  
54  
55 impact on patients' prognosis. They found that coronary injection with tirofiban and  
56  
57 XST was more effective in improving coronary blood flow and showed no increase in  
58  
59 the incidence of hemorrhagic complications compared with the injection with  
60

1  
2  
3  
4 tirofiban only. *P. notoginseng* has been found to be beneficial in patients with UA.  
5  
6 The use of the extract has been recommended for patients with UA in clinical practice  
7  
8 as a complementary and alternative therapy<sup>[18]</sup>. However, more randomized controlled  
9  
10 trials with reliable designs, large samples, and long-term observations are needed for  
11  
12 further evaluations.

13  
14 The meta-analysis of XST injection combined with routine basic treatment was  
15  
16 superior to routine basic treatment alone in alleviating clinical symptoms, with  
17  
18 statistically significant differences between the groups. XST injection combined with  
19  
20 routine basic treatment could alleviate UA pectorals. However, due to the low quality  
21  
22 of the included studies, further well-designed, multicenter, and large-scale RCTs are  
23  
24 still needed to evaluate the efficacy of XST injection<sup>[19]</sup>. Moreover, the total revenue  
25  
26 from XST in the Chinese market in 2013 was over \$700 million <sup>[20]</sup>. Therefore,  
27  
28 enormous consumption requires stricter and accurate evidence on its safety. However,  
29  
30 many reports of XST were case reports, and hence large-sample and high-level  
31  
32 evidence for the efficacy and safety of XST is still lacking. Therefore, this study will  
33  
34 be conducted to investigate the efficacy and safety of XST in reducing the incidence  
35  
36 of MACE in patients with UA. The findings of this study will provide clinical  
37  
38 evidence for the use of XST in reducing the incidence of MACE in patients with UA.  
39  
40  
41

## 42 **Acknowledgments**

43  
44 The authors are grateful to Professor Licheng Zhao from Guangzhou University of  
45  
46 Chinese Medicine for his guidance during this study. We also thank Miss Jingyi Xu,  
47  
48 who carefully checked the references. We also thank MedSci for the language editing  
49  
50 of the manuscript.  
51  
52  
53  
54

## 55 **Contributors**

56  
57  
58 ZY and WL wrote the study protocol. SX, HL, TY and YT developed the original  
59  
60

1  
2  
3  
4 study design. XH, JL, YH, JD, YL and WL were all involved in the revision of the  
5 study design and contributed to the review process of the protocol manuscript. YT and  
6  
7 QL are jointly responsible for the collection of data and administration of study  
8  
9 participants. LL provides methodological guidance on research statistics. ZY is the  
10  
11 principal investigator and responsible for the funding and overall management of the  
12  
13 trial.  
14  
15  
16  
17

### 18 **Funding**

19  
20  
21 This study has been supported by the National Key Research and Development Plan  
22  
23 (2018YFC1707401) and the second batch of national Traditional Chinese  
24  
25 Medicine(TCM) clinical research base project (2018131).  
26  
27  
28  
29  
30

### 31 **Disclaimer**

32  
33  
34 The funders have no role in the study design, data collection and analysis, decision to  
35  
36 publish or preparation of the manuscript.  
37  
38  
39  
40

### 41 **Trial status**

42  
43 Currently the participants are being enrolled for the trial.  
44  
45

### 46 **Conflicts of interest**

47  
48  
49 All authors declare no conflicts of interest.  
50  
51  
52  
53  
54  
55  
56  
57  
58  
59  
60

## References

1. Ueda P, Gulayin P, Danaei G. Long-term moderately elevated LDL-cholesterol and blood pressure and risk of coronary heart disease. *PloS one* 2018;13(7):e0200017. doi: 10.1371/journal.pone.0200017.
2. Kannel WB, Feinleib M. Natural history of angina pectoris in the Framingham study. Prognosis and survival. *The American journal of cardiology* 1972;29(2):154-63. doi: 10.1016/0002-9149(72)90624-8.
3. Wan JB, Lee SM, Wang JD, et al. Panax notoginseng reduces atherosclerotic lesions in ApoE-deficient mice and inhibits TNF-alpha-induced endothelial adhesion molecule expression and monocyte adhesion. *Journal of agricultural and food chemistry* 2009;57(15):6692-7. doi: 10.1021/jf900529w.
4. Wang N, Wan JB, Chan SW, et al. Comparative study on saponin fractions from Panax notoginseng inhibiting inflammation-induced endothelial adhesion molecule expression and monocyte adhesion. *Chinese medicine* 2011;6:37. doi: 10.1186/1749-8546-6-37
5. Gong X, Shen JH, Wu GP. Effect of Xueshuantong injection on cerebral infarction. *Hainan Yixueyuan Xuebao*. 2009;15(6):603–604.
6. Fu XX, Xiao WJ, Lu J, et al. Retrospective analysis of thrombolysis therapy for 64 cases of acute myocardial infarction with elevated ST segment. *Chinese journal of integrative medicine* 2009;15(6):462-5. doi: 10.1007/s11655-009-0462-8.
7. Han S, Chen Y, Wang J, et al. Anti-thrombosis Effects and Mechanisms by Xueshuantong Capsule Under Different Flow Conditions. *Front Pharmacol*. 2019;10:35. Published 2019 Feb 7. doi:10.3389/fphar.2019.00035
8. Han S, Chen Y, Wang J, et al. Anti-thrombosis Effects and Mechanisms by Xueshuantong Capsule Under Different Flow Conditions. *Front Pharmacol*. 2019;10:35. Published 2019 Feb 7. doi:10.3389/fphar.2019.00035
9. Liu L, Ding SL, Chen Y, et al. *Zhongguo Zhong Yao Za Zhi*. 2020;45(10):2446-2453.

- 1  
2  
3  
4 doi:10.19540/j.cnki.cjcm.20191112.404  
5  
6  
7 10. Gao Y, Lyu J, Xie YM, Sun MH. Zhongguo Zhong Yao Za Zhi. 2019;44(20):4366-4378.  
8  
9 doi:10.19540/j.cnki.cjcm.20190724.501  
10  
11 11. Liu H, Yang J, Yang W, et al. Focus on Notoginsenoside R1 in Metabolism and Prevention Against  
12  
13 Human Diseases. Drug Des Devel Ther. 2020  
14  
15 12. Chan AW, Tetzlaff JM, Gotzsche PC, et al. SPIRIT 2013 explanation and elaboration: guidance for  
16  
17 protocols of clinical trials. BMJ (Clinical research ed) 2013;346:e7586. doi: 10.1136/bmj.e7586  
18  
19 13. Association of Initial and Serial C-Reactive Protein Levels With Adverse Cardiovascular Events  
20  
21 and Death After Acute Coronary Syndrome: A Secondary Analysis of the VISTA-16  
22  
23 Trial. JAMA Cardiol. 2019;4(4):314-320.  
24  
25 14. Yang X, Xiong X, Wang H, et al. Protective effects of panax notoginseng saponins on  
26  
27 cardiovascular diseases: a comprehensive overview of experimental studies. Evidence-based  
28  
29 complementary and alternative medicine : eCAM 2014;2014:204840. doi: 10.1155/2014/204840  
30  
31 15. Gui Q, Yang Y, Ying S, et al. Xueshuantong improves cerebral blood perfusion in elderly patients  
32  
33 with lacunar infarction. Neural regeneration research 2013;8(9):792-801. doi:  
34  
35 10.3969/j.issn.1673-5374.2013.09.003  
36  
37 16. Wang FJ, Wang SX, Chai LJ, Zhang Y, Guo H, Hu LM. Xueshuantong injection (lyophilized)  
38  
39 combined with salvianolate lyophilized injection protects against focal cerebral  
40  
41 ischemia/reperfusion injury in rats through attenuation of oxidative stress. Acta Pharmacol Sin.  
42  
43 2018;39(6):998-1011. doi:10.1038/aps.2017.128  
44  
45 17. Gan LJ, Zhang CH, Zhang M. Effect of intracoronary injection with xuesaitong in treating post-PCI  
46  
47 slow-reflow phenomenon in patients with ST-segment elevation myocardial infarction. Zhongguo  
48  
49 Zhong xi yi jie he za zhi Zhongguo Zhongxiyi jiehe zazhi = Chinese journal of integrated  
50  
51 traditional and Western medicine 2010;30(4):348-51.  
52  
53 18. Song H, Wang P, Liu J, et al. Panax notoginseng Preparations for Unstable Angina Pectoris: A  
54  
55 Systematic Review and Meta-Analysis. Phytotherapy research : PTR 2017;31(8):1162-72. doi:  
56  
57 10.1002/ptr.5848  
58  
59  
60



- 1  
2  
3  
4 19. Gao Y, Lyu J, Xie YM, Sun MH. Effectiveness and safety of Xueshuantong injection in treatment  
5 of UA pectoris: a systematic review and Meta-analysis of randomized controlled trials. *Zhongguo*  
6 *Zhong Yao Za Zhi*. 2019;44(20):4366-4378  
7  
8  
9  
10 20. Wang FJ, Wang SX, Chai LJ, et al. Xueshuantong injection (lyophilized) combined with  
11 salviaolate lyophilized injection protects against focal cerebral ischemia/reperfusion injury in  
12 rats through attenuation of oxidative stress. *Acta pharmacologica Sinica* 2018;39(6):998-1011.  
13 doi: 10.1038/aps.2017.128  
14  
15  
16  
17 21. Zheng XY. *Chinese Medicine New Drug Clinical Guidelines*. 2002; Beijing, China: China  
18 *Pharmaceutical Science and Technology Press*, 392  
19  
20  
21  
22 22. Mendis S, Thygesen K, Kuulasmaa K, et al. World Health Organization definition of myocardial  
23 infarction: 2008-09 revision. *Int J Epidemiol*. 2011;40(1):139-146  
24  
25  
26  
27 23. Antman EM, Cohen M, Bernink PJ, et al. The TIMI risk score for unstable angina/non-ST elevation  
28 MI: A method for prognostication and therapeutic decision making. *JAMA* 2000;284(7):835-42.  
29 doi: 10.1001/jama.284.7.835  
30  
31  
32  
33  
34  
35  
36  
37  
38  
39  
40  
41  
42  
43

44 Table 1. Inclusion and exclusion criteria

| Inclusion criteria                                                                                                                                                                                                                                                            | Exclusion criteria                                                                                                                                                                                                                                                                                    |
|-------------------------------------------------------------------------------------------------------------------------------------------------------------------------------------------------------------------------------------------------------------------------------|-------------------------------------------------------------------------------------------------------------------------------------------------------------------------------------------------------------------------------------------------------------------------------------------------------|
| <ul style="list-style-type: none"> <li>● Patients who meet all the following requirements</li> <li>● Patients diagnosed with coronary heart disease who met at least one of the following diagnostic criteria<sup>[1]</sup>:<br/>(1) a clear history of myocardial</li> </ul> | <ul style="list-style-type: none"> <li>◆ Patients with cardiac function class IV (New York Heart Association cardiac function grading); or patients at a high risk of UA short-term risk stratification</li> <li>◆ Patients with uncontrolled grade III hypertension having systolic blood</li> </ul> |

|                                                                                                                                                                                                                                                                                                                                                                                                                                                                                                                                                                                                                                                                                                                                                                                                                                                                                                                                                                                                                                                                                                          |                                                                                                                                                                                                                                                                                                                                                                                                                                                                                                                                                                                                                                                                                                                                                                                                                                                                                                                                                                                                                                                                                                                                                                                                                                                                                                           |
|----------------------------------------------------------------------------------------------------------------------------------------------------------------------------------------------------------------------------------------------------------------------------------------------------------------------------------------------------------------------------------------------------------------------------------------------------------------------------------------------------------------------------------------------------------------------------------------------------------------------------------------------------------------------------------------------------------------------------------------------------------------------------------------------------------------------------------------------------------------------------------------------------------------------------------------------------------------------------------------------------------------------------------------------------------------------------------------------------------|-----------------------------------------------------------------------------------------------------------------------------------------------------------------------------------------------------------------------------------------------------------------------------------------------------------------------------------------------------------------------------------------------------------------------------------------------------------------------------------------------------------------------------------------------------------------------------------------------------------------------------------------------------------------------------------------------------------------------------------------------------------------------------------------------------------------------------------------------------------------------------------------------------------------------------------------------------------------------------------------------------------------------------------------------------------------------------------------------------------------------------------------------------------------------------------------------------------------------------------------------------------------------------------------------------------|
| <p>infarction (MI);</p> <p>(2) prior coronary revascularization;</p> <p>(3) coronary angiography or coronary angiography suggesting at least one coronary artery stenosis with catheter stenosis <math>\geq 50\%</math>;</p> <p>(4) cardiac magnetic resonance imaging or radionuclide myocardial perfusion imaging to confirm myocardial ischemia in the patient having coronary heart disease</p> <ul style="list-style-type: none"> <li>● Patients complying with the diagnosis of UA and having at least one of the following conditions<sup>[21]</sup>:       <ol style="list-style-type: none"> <li>(1) electrocardiograph with a transient or persistent ST-segment depression of 0.1 mV and even more on one or more leads<sup>[22]</sup>;</li> <li>(2) Thrombolysis In Myocardial Infarction (TIMI) risk score<sup>[23]</sup> <math>\geq 3</math></li> </ol> </li> <li>● Patients receiving dual antiplatelet therapy (aspirin + clopidogrel)</li> <li>● Patients aged 40–75 years, irrespective of sex</li> <li>● Patients willing to accept the drug treatment and provide written</li> </ul> | <p>pressure <math>\geq 180</math> mm Hg and/or diastolic blood pressure <math>\geq 110</math> mm Hg; severe cardiopulmonary insufficiency; severe arrhythmia; severe primary diseases of the liver, kidney, and hematopoietic system; or serious diseases (such as tumors) and mental diseases</p> <ul style="list-style-type: none"> <li>◆ Patients also having other clinical conditions that might increase the risk of bleeding, such as a history of important organ bleeding in the last 6 months (such as intracerebral hemorrhage and upper gastrointestinal bleeding), decreased platelet count, abnormal coagulation function, and recent active bleeding</li> <li>◆ Patients with abnormal function indexes of the liver and kidney [blood alanine aminotransferase (ALT) and aspartate aminotransferase (AST) level more than two times the upper normal reference range; glomerular filtration rate (GFR) <math>&lt; 60</math> mL/(min <math>\times</math> 1.73 m<sup>2</sup>)]. Simplified Modification of Diet in Renal Disease formula: GFR [mL/(min <math>\times</math> 1.73 m<sup>2</sup>)] = <math>186.3 \times</math> serum creatinine (Scr)<sup>-1.154</sup> <math>\times</math> (age)<sup>-0.203</sup> <math>\times</math> (0.742 female); Scr in mg/dL and age in years</li> </ul> |
|----------------------------------------------------------------------------------------------------------------------------------------------------------------------------------------------------------------------------------------------------------------------------------------------------------------------------------------------------------------------------------------------------------------------------------------------------------------------------------------------------------------------------------------------------------------------------------------------------------------------------------------------------------------------------------------------------------------------------------------------------------------------------------------------------------------------------------------------------------------------------------------------------------------------------------------------------------------------------------------------------------------------------------------------------------------------------------------------------------|-----------------------------------------------------------------------------------------------------------------------------------------------------------------------------------------------------------------------------------------------------------------------------------------------------------------------------------------------------------------------------------------------------------------------------------------------------------------------------------------------------------------------------------------------------------------------------------------------------------------------------------------------------------------------------------------------------------------------------------------------------------------------------------------------------------------------------------------------------------------------------------------------------------------------------------------------------------------------------------------------------------------------------------------------------------------------------------------------------------------------------------------------------------------------------------------------------------------------------------------------------------------------------------------------------------|

|                                                                                           |                                                                                                                                                                                                                                                                                                                                                                                                                                                                                                                     |
|-------------------------------------------------------------------------------------------|---------------------------------------------------------------------------------------------------------------------------------------------------------------------------------------------------------------------------------------------------------------------------------------------------------------------------------------------------------------------------------------------------------------------------------------------------------------------------------------------------------------------|
| <p>informed consent, conforming to the relevant regulations of Good Clinical Practice</p> | <ul style="list-style-type: none"> <li>◆ Patients who planned to undergo revascularization [PCI or coronary artery bypass grafting (CABG)] recently</li> <li>◆ Patients allergic to a variety of foods, or with known allergy to study drugs, including their components</li> <li>◆ Patients pregnant, preparing for pregnancy, or lactating</li> <li>◆ Patients participating in other clinical trials during the same period</li> <li>◆ Patients considered inappropriate to participate in this study</li> </ul> |
|-------------------------------------------------------------------------------------------|---------------------------------------------------------------------------------------------------------------------------------------------------------------------------------------------------------------------------------------------------------------------------------------------------------------------------------------------------------------------------------------------------------------------------------------------------------------------------------------------------------------------|

Table 2. Study schedule of assessments

Abbreviations: CK-MB, creatine kinase MB; MACE, major adverse cardiac events; cTn, cardiac troponin; hsTn, high-sensitivity Troponin; UA, unstable angina.

|                    | Study period |            |              |                   |
|--------------------|--------------|------------|--------------|-------------------|
|                    | Enrollment   | Allocation | Intervention | Follow-up         |
| Time point         | -3~0 days    | 0          | 7 ~ 14 days  | 1, 3 and 6 months |
| ENROLLMENT:        | X            |            |              |                   |
| Eligibility screen | X            |            |              |                   |
| Informed consent   | X            |            |              |                   |

|                   |  |          |          |          |
|-------------------|--|----------|----------|----------|
| Allocation        |  | <b>X</b> |          |          |
| INTERVENTIONS:    |  |          |          |          |
| SXT treatment     |  |          | <b>X</b> |          |
| Placebo treatment |  |          | <b>X</b> |          |
| ASSESSMENTS:      |  |          |          |          |
| MACE              |  |          | <b>X</b> | <b>X</b> |
| CK-MB             |  | <b>X</b> | <b>X</b> |          |
| cTnT              |  | <b>X</b> | <b>X</b> |          |
| cTnI              |  | <b>X</b> | <b>X</b> |          |
| hsTnI             |  | <b>X</b> | <b>X</b> |          |
| Adverse events    |  |          | <b>X</b> | <b>X</b> |

1  
2  
3  
4 **Figure legends**  
5

6 Figure 1. Flowchart of the study procedure.  
7  
8  
9  
10  
11  
12  
13  
14  
15  
16  
17  
18  
19  
20  
21  
22  
23  
24  
25  
26  
27  
28  
29  
30  
31  
32  
33  
34  
35  
36  
37  
38  
39  
40  
41  
42  
43  
44  
45  
46  
47  
48  
49  
50  
51  
52  
53  
54  
55  
56  
57  
58  
59  
60

For peer review only

1  
2  
3  
4  
5  
6  
7  
8  
9  
10  
11  
12  
13  
14  
15  
16  
17  
18  
19  
20  
21  
22  
23  
24  
25  
26  
27  
28  
29  
30  
31  
32  
33  
34  
35  
36  
37  
38  
39  
40  
41  
42  
43  
44  
45  
46  
47  
48  
49  
50  
51  
52  
53  
54  
55  
56  
57  
58  
59  
60

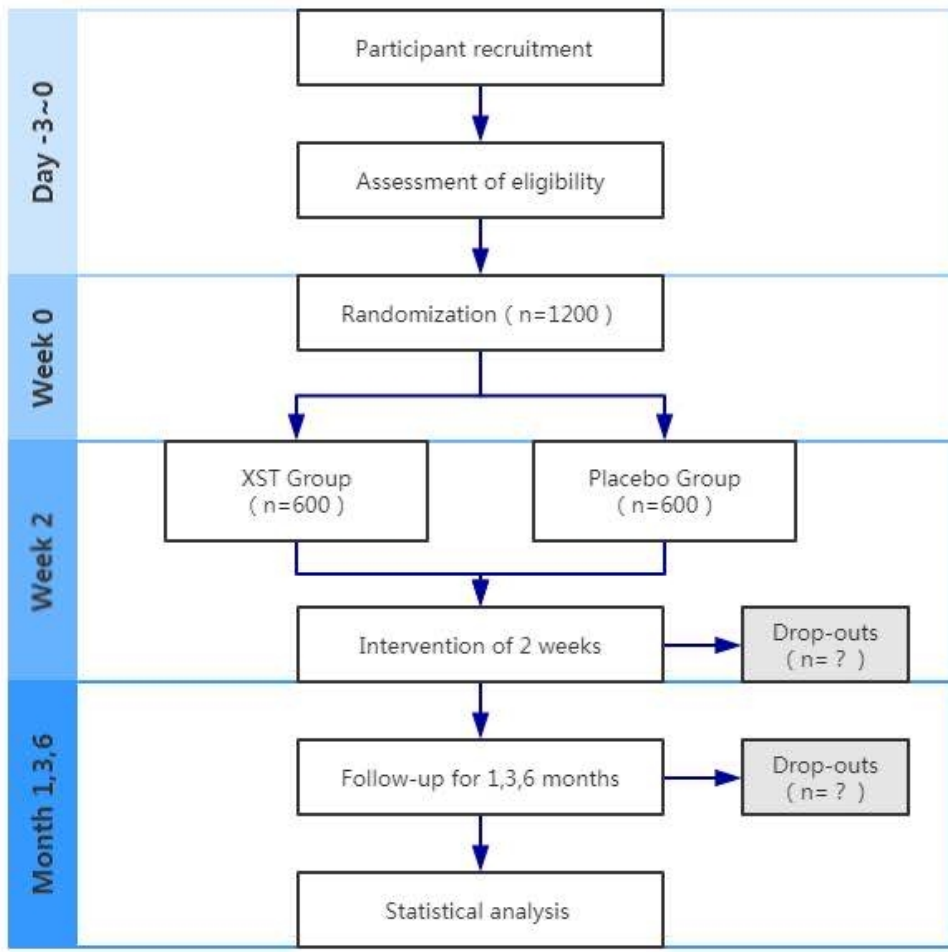

Flowchart of the study procedure.

159x155mm (96 x 96 DPI)

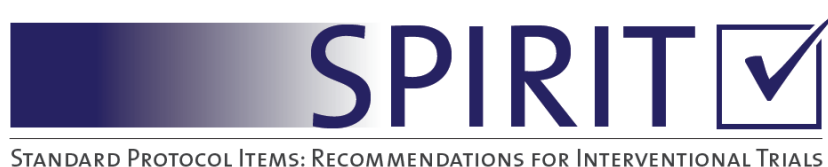

SPIRIT 2013 Checklist: Recommended items to address in a clinical trial protocol and related documents\*

| Section/item                      | Item No | Description                                                                                                                                                                                                                                                                              | Reported on page No |
|-----------------------------------|---------|------------------------------------------------------------------------------------------------------------------------------------------------------------------------------------------------------------------------------------------------------------------------------------------|---------------------|
| <b>Administrative information</b> |         |                                                                                                                                                                                                                                                                                          |                     |
| Title                             | 1       | Descriptive title identifying the study design, population, interventions, and, if applicable, trial acronym                                                                                                                                                                             | 1                   |
| Trial registration                | 2a      | Trial identifier and registry name. If not yet registered, name of intended registry                                                                                                                                                                                                     | 4                   |
|                                   | 2b      | All items from the World Health Organization Trial Registration Data Set                                                                                                                                                                                                                 | 4                   |
| Protocol version                  | 3       | Date and version identifier                                                                                                                                                                                                                                                              | 4                   |
| Funding                           | 4       | Sources and types of financial, material, and other support                                                                                                                                                                                                                              | 17                  |
| Roles and responsibilities        | 5a      | Names, affiliations, and roles of protocol contributors                                                                                                                                                                                                                                  | 1,2,17              |
|                                   | 5b      | Name and contact information for the trial sponsor                                                                                                                                                                                                                                       | 17                  |
|                                   | 5c      | Role of study sponsor and funders, if any, in study design; collection, management, analysis, and interpretation of data; writing of the report; and the decision to submit the report for publication, including whether they will have ultimate authority over any of these activities | 17-18               |
|                                   | 5d      | Composition, roles, and responsibilities of the coordinating centre, steering committee, endpoint adjudication committee, data management team, and other individuals or groups overseeing the trial, if applicable (see Item 21a for data monitoring committee)                         | 17                  |
| <b>Introduction</b>               |         |                                                                                                                                                                                                                                                                                          |                     |
| Background and rationale          | 6a      | Description of research question and justification for undertaking the trial, including summary of relevant studies (published and unpublished) examining benefits and harms for each intervention                                                                                       | 5,6                 |
|                                   | 6b      | Explanation for choice of comparators                                                                                                                                                                                                                                                    | 5,6                 |
| Objectives                        | 7       | Specific objectives or hypotheses                                                                                                                                                                                                                                                        | 5,6                 |

|    |                                                           |     |                                                                                                                                                                                                                                                                                                                                                                                |              |
|----|-----------------------------------------------------------|-----|--------------------------------------------------------------------------------------------------------------------------------------------------------------------------------------------------------------------------------------------------------------------------------------------------------------------------------------------------------------------------------|--------------|
| 1  |                                                           |     |                                                                                                                                                                                                                                                                                                                                                                                |              |
| 2  | Trial design                                              | 8   | Description of trial design including type of trial (eg, parallel group, crossover, factorial, single group), allocation ratio, and framework (eg, superiority, equivalence, noninferiority, exploratory)                                                                                                                                                                      | 6            |
| 3  |                                                           |     |                                                                                                                                                                                                                                                                                                                                                                                |              |
| 4  |                                                           |     |                                                                                                                                                                                                                                                                                                                                                                                |              |
| 5  |                                                           |     |                                                                                                                                                                                                                                                                                                                                                                                |              |
| 6  |                                                           |     |                                                                                                                                                                                                                                                                                                                                                                                |              |
| 7  |                                                           |     |                                                                                                                                                                                                                                                                                                                                                                                |              |
| 8  | <b>Methods: Participants, interventions, and outcomes</b> |     |                                                                                                                                                                                                                                                                                                                                                                                |              |
| 9  |                                                           |     |                                                                                                                                                                                                                                                                                                                                                                                |              |
| 10 | Study setting                                             | 9   | Description of study settings (eg, community clinic, academic hospital) and list of countries where data will be collected. Reference to where list of study sites can be obtained                                                                                                                                                                                             | 6-7          |
| 11 |                                                           |     |                                                                                                                                                                                                                                                                                                                                                                                |              |
| 12 |                                                           |     |                                                                                                                                                                                                                                                                                                                                                                                |              |
| 13 |                                                           |     |                                                                                                                                                                                                                                                                                                                                                                                |              |
| 14 | Eligibility criteria                                      | 10  | Inclusion and exclusion criteria for participants. If applicable, eligibility criteria for study centres and individuals who will perform the interventions (eg, surgeons, psychotherapists)                                                                                                                                                                                   | 7-8<br>21-22 |
| 15 |                                                           |     |                                                                                                                                                                                                                                                                                                                                                                                |              |
| 16 |                                                           |     |                                                                                                                                                                                                                                                                                                                                                                                |              |
| 17 |                                                           |     |                                                                                                                                                                                                                                                                                                                                                                                |              |
| 18 |                                                           |     |                                                                                                                                                                                                                                                                                                                                                                                |              |
| 19 | Interventions                                             | 11a | Interventions for each group with sufficient detail to allow replication, including how and when they will be administered                                                                                                                                                                                                                                                     | 7-8          |
| 20 |                                                           |     |                                                                                                                                                                                                                                                                                                                                                                                |              |
| 21 |                                                           |     |                                                                                                                                                                                                                                                                                                                                                                                |              |
| 22 |                                                           | 11b | Criteria for discontinuing or modifying allocated interventions for a given trial participant (eg, drug dose change in response to harms, participant request, or improving/worsening disease)                                                                                                                                                                                 | 11-12        |
| 23 |                                                           |     |                                                                                                                                                                                                                                                                                                                                                                                |              |
| 24 |                                                           |     |                                                                                                                                                                                                                                                                                                                                                                                |              |
| 25 |                                                           |     |                                                                                                                                                                                                                                                                                                                                                                                |              |
| 26 |                                                           | 11c | Strategies to improve adherence to intervention protocols, and any procedures for monitoring adherence (eg, drug tablet return, laboratory tests)                                                                                                                                                                                                                              | 11-12        |
| 27 |                                                           |     |                                                                                                                                                                                                                                                                                                                                                                                |              |
| 28 |                                                           |     |                                                                                                                                                                                                                                                                                                                                                                                |              |
| 29 |                                                           |     |                                                                                                                                                                                                                                                                                                                                                                                |              |
| 30 |                                                           |     |                                                                                                                                                                                                                                                                                                                                                                                |              |
| 31 |                                                           | 11d | Relevant concomitant care and interventions that are permitted or prohibited during the trial                                                                                                                                                                                                                                                                                  | 11-12        |
| 32 |                                                           |     |                                                                                                                                                                                                                                                                                                                                                                                |              |
| 33 |                                                           |     |                                                                                                                                                                                                                                                                                                                                                                                |              |
| 34 | Outcomes                                                  | 12  | Primary, secondary, and other outcomes, including the specific measurement variable (eg, systolic blood pressure), analysis metric (eg, change from baseline, final value, time to event), method of aggregation (eg, median, proportion), and time point for each outcome. Explanation of the clinical relevance of chosen efficacy and harm outcomes is strongly recommended | 12-13        |
| 35 |                                                           |     |                                                                                                                                                                                                                                                                                                                                                                                |              |
| 36 |                                                           |     |                                                                                                                                                                                                                                                                                                                                                                                |              |
| 37 |                                                           |     |                                                                                                                                                                                                                                                                                                                                                                                |              |
| 38 |                                                           |     |                                                                                                                                                                                                                                                                                                                                                                                |              |
| 39 |                                                           |     |                                                                                                                                                                                                                                                                                                                                                                                |              |
| 40 |                                                           |     |                                                                                                                                                                                                                                                                                                                                                                                |              |
| 41 |                                                           |     |                                                                                                                                                                                                                                                                                                                                                                                |              |
| 42 | Participant timeline                                      | 13  | Time schedule of enrolment, interventions (including any run-ins and washouts), assessments, and visits for participants. A schematic diagram is highly recommended (see Figure)                                                                                                                                                                                               | 23-24        |
| 43 |                                                           |     |                                                                                                                                                                                                                                                                                                                                                                                |              |
| 44 |                                                           |     |                                                                                                                                                                                                                                                                                                                                                                                |              |
| 45 |                                                           |     |                                                                                                                                                                                                                                                                                                                                                                                |              |
| 46 |                                                           |     |                                                                                                                                                                                                                                                                                                                                                                                |              |
| 47 | Sample size                                               | 14  | Estimated number of participants needed to achieve study objectives and how it was determined, including clinical and statistical assumptions supporting any sample size calculations                                                                                                                                                                                          | 23-24        |
| 48 |                                                           |     |                                                                                                                                                                                                                                                                                                                                                                                |              |
| 49 |                                                           |     |                                                                                                                                                                                                                                                                                                                                                                                |              |
| 50 |                                                           |     |                                                                                                                                                                                                                                                                                                                                                                                |              |
| 51 | Recruitment                                               | 15  | Strategies for achieving adequate participant enrolment to reach target sample size                                                                                                                                                                                                                                                                                            | 9-10         |
| 52 |                                                           |     |                                                                                                                                                                                                                                                                                                                                                                                |              |
| 53 |                                                           |     |                                                                                                                                                                                                                                                                                                                                                                                |              |

#### Methods: Assignment of interventions (for controlled trials)

Allocation:



|    |                |     |                                                                         |       |
|----|----------------|-----|-------------------------------------------------------------------------|-------|
| 1  |                |     |                                                                         |       |
| 2  | Sequence       | 16a | Method of generating the allocation sequence (eg, computer-             | 10-11 |
| 3  | generation     |     | generated random numbers), and list of any factors for stratification.  |       |
| 4  |                |     | To reduce predictability of a random sequence, details of any planned   |       |
| 5  |                |     | restriction (eg, blocking) should be provided in a separate document    |       |
| 6  |                |     | that is unavailable to those who enrol participants or assign           |       |
| 7  |                |     | interventions                                                           |       |
| 8  |                |     |                                                                         |       |
| 9  |                |     |                                                                         |       |
| 10 | Allocation     | 16b | Mechanism of implementing the allocation sequence (eg, central          | 10-11 |
| 11 | concealment    |     | telephone; sequentially numbered, opaque, sealed envelopes),            |       |
| 12 | mechanism      |     | describing any steps to conceal the sequence until interventions are    |       |
| 13 |                |     | assigned                                                                |       |
| 14 |                |     |                                                                         |       |
| 15 | Implementation | 16c | Who will generate the allocation sequence, who will enrol participants, | 10-11 |
| 16 |                |     | and who will assign participants to interventions                       |       |
| 17 |                |     |                                                                         |       |
| 18 |                |     |                                                                         |       |
| 19 | Blinding       | 17a | Who will be blinded after assignment to interventions (eg, trial        | 10-11 |
| 20 | (masking)      |     | participants, care providers, outcome assessors, data analysts), and    |       |
| 21 |                |     | how                                                                     |       |
| 22 |                |     |                                                                         |       |
| 23 |                | 17b | If blinded, circumstances under which unblinding is permissible, and    | 10-11 |
| 24 |                |     | procedure for revealing a participant's allocated intervention during   |       |
| 25 |                |     | the trial                                                               |       |
| 26 |                |     |                                                                         |       |
| 27 |                |     |                                                                         |       |

### Methods: Data collection, management, and analysis

|    |                 |     |                                                                          |       |
|----|-----------------|-----|--------------------------------------------------------------------------|-------|
| 28 |                 |     |                                                                          |       |
| 29 |                 |     |                                                                          |       |
| 30 | Data collection | 18a | Plans for assessment and collection of outcome, baseline, and other      | 13    |
| 31 | methods         |     | trial data, including any related processes to promote data quality (eg, |       |
| 32 |                 |     | duplicate measurements, training of assessors) and a description of      |       |
| 33 |                 |     | study instruments (eg, questionnaires, laboratory tests) along with      |       |
| 34 |                 |     | their reliability and validity, if known. Reference to where data        |       |
| 35 |                 |     | collection forms can be found, if not in the protocol                    |       |
| 36 |                 |     |                                                                          |       |
| 37 |                 |     |                                                                          |       |
| 38 |                 | 18b | Plans to promote participant retention and complete follow-up,           | 15    |
| 39 |                 |     | including list of any outcome data to be collected for participants who  |       |
| 40 |                 |     | discontinue or deviate from intervention protocols                       |       |
| 41 |                 |     |                                                                          |       |
| 42 | Data            | 19  | Plans for data entry, coding, security, and storage, including any       | 13,15 |
| 43 | management      |     | related processes to promote data quality (eg, double data entry;        |       |
| 44 |                 |     | range checks for data values). Reference to where details of data        |       |
| 45 |                 |     | management procedures can be found, if not in the protocol               |       |
| 46 |                 |     |                                                                          |       |
| 47 |                 |     |                                                                          |       |
| 48 | Statistical     | 20a | Statistical methods for analysing primary and secondary outcomes.        | 15    |
| 49 | methods         |     | Reference to where other details of the statistical analysis plan can be |       |
| 50 |                 |     | found, if not in the protocol                                            |       |
| 51 |                 |     |                                                                          |       |
| 52 |                 | 20b | Methods for any additional analyses (eg, subgroup and adjusted           | 15    |
| 53 |                 |     | analyses)                                                                |       |
| 54 |                 |     |                                                                          |       |
| 55 |                 | 20c | Definition of analysis population relating to protocol non-adherence     | 15    |
| 56 |                 |     | (eg, as randomised analysis), and any statistical methods to handle      |       |
| 57 |                 |     | missing data (eg, multiple imputation)                                   |       |
| 58 |                 |     |                                                                          |       |
| 59 |                 |     |                                                                          |       |
| 60 |                 |     |                                                                          |       |

## Methods: Monitoring

|                                                                                                                                           |                            |     |                                                                                                                                                                                                                                                                                                                                       |    |
|-------------------------------------------------------------------------------------------------------------------------------------------|----------------------------|-----|---------------------------------------------------------------------------------------------------------------------------------------------------------------------------------------------------------------------------------------------------------------------------------------------------------------------------------------|----|
| 1<br>2<br>3<br>4<br>5<br>6<br>7<br>8<br>9<br>10<br>11<br>12<br>13<br>14<br>15<br>16<br>17<br>18<br>19<br>20<br>21<br>22<br>23<br>24<br>25 | <b>Methods: Monitoring</b> |     |                                                                                                                                                                                                                                                                                                                                       |    |
|                                                                                                                                           | Data monitoring            | 21a | Composition of data monitoring committee (DMC); summary of its role and reporting structure; statement of whether it is independent from the sponsor and competing interests; and reference to where further details about its charter can be found, if not in the protocol. Alternatively, an explanation of why a DMC is not needed | 17 |
|                                                                                                                                           |                            | 21b | Description of any interim analyses and stopping guidelines, including who will have access to these interim results and make the final decision to terminate the trial                                                                                                                                                               | 17 |
|                                                                                                                                           | Harms                      | 22  | Plans for collecting, assessing, reporting, and managing solicited and spontaneously reported adverse events and other unintended effects of trial interventions or trial conduct                                                                                                                                                     | 17 |
|                                                                                                                                           | Auditing                   | 23  | Frequency and procedures for auditing trial conduct, if any, and whether the process will be independent from investigators and the sponsor                                                                                                                                                                                           | 17 |

## Ethics and dissemination

|                                                                                                                                                                                                                |                                 |     |                                                                                                                                                                                                                                  |      |
|----------------------------------------------------------------------------------------------------------------------------------------------------------------------------------------------------------------|---------------------------------|-----|----------------------------------------------------------------------------------------------------------------------------------------------------------------------------------------------------------------------------------|------|
| 26<br>27<br>28<br>29<br>30<br>31<br>32<br>33<br>34<br>35<br>36<br>37<br>38<br>39<br>40<br>41<br>42<br>43<br>44<br>45<br>46<br>47<br>48<br>49<br>50<br>51<br>52<br>53<br>54<br>55<br>56<br>57<br>58<br>59<br>60 | <b>Ethics and dissemination</b> |     |                                                                                                                                                                                                                                  |      |
|                                                                                                                                                                                                                | Research ethics approval        | 24  | Plans for seeking research ethics committee/institutional review board (REC/IRB) approval                                                                                                                                        | 8    |
|                                                                                                                                                                                                                | Protocol amendments             | 25  | Plans for communicating important protocol modifications (eg, changes to eligibility criteria, outcomes, analyses) to relevant parties (eg, investigators, REC/IRBs, trial participants, trial registries, journals, regulators) | 8    |
|                                                                                                                                                                                                                | Consent or assent               | 26a | Who will obtain informed consent or assent from potential trial participants or authorised surrogates, and how (see Item 32)                                                                                                     | 8    |
|                                                                                                                                                                                                                |                                 | 26b | Additional consent provisions for collection and use of participant data and biological specimens in ancillary studies, if applicable                                                                                            | NA   |
|                                                                                                                                                                                                                | Confidentiality                 | 27  | How personal information about potential and enrolled participants will be collected, shared, and maintained in order to protect confidentiality before, during, and after the trial                                             | 8,17 |
|                                                                                                                                                                                                                | Declaration of interests        | 28  | Financial and other competing interests for principal investigators for the overall trial and each study site                                                                                                                    | 18   |
|                                                                                                                                                                                                                | Access to data                  | 29  | Statement of who will have access to the final trial dataset, and disclosure of contractual agreements that limit such access for investigators                                                                                  | 17   |
|                                                                                                                                                                                                                | Ancillary and post-trial care   | 30  | Provisions, if any, for ancillary and post-trial care, and for compensation to those who suffer harm from trial participation                                                                                                    | NA   |

|    |               |     |                                                                              |    |
|----|---------------|-----|------------------------------------------------------------------------------|----|
| 1  |               |     |                                                                              |    |
| 2  | Dissemination | 31a | Plans for investigators and sponsor to communicate trial results to          | NA |
| 3  | policy        |     | participants, healthcare professionals, the public, and other relevant       |    |
| 4  |               |     | groups (eg, via publication, reporting in results databases, or other        |    |
| 5  |               |     | data sharing arrangements), including any publication restrictions           |    |
| 6  |               |     |                                                                              |    |
| 7  |               | 31b | Authorship eligibility guidelines and any intended use of professional       | 17 |
| 8  |               |     | writers                                                                      |    |
| 9  |               |     |                                                                              |    |
| 10 |               | 31c | Plans, if any, for granting public access to the full protocol, participant- | NA |
| 11 |               |     | level dataset, and statistical code                                          |    |
| 12 |               |     |                                                                              |    |
| 13 |               |     |                                                                              |    |

## Appendices

|    |                  |    |                                                                          |    |
|----|------------------|----|--------------------------------------------------------------------------|----|
| 14 |                  |    |                                                                          |    |
| 15 |                  |    |                                                                          |    |
| 16 | Informed consent | 32 | Model consent form and other related documentation given to              | NA |
| 17 | materials        |    | participants and authorised surrogates                                   |    |
| 18 |                  |    |                                                                          |    |
| 19 | Biological       | 33 | Plans for collection, laboratory evaluation, and storage of biological   | NA |
| 20 | specimens        |    | specimens for genetic or molecular analysis in the current trial and for |    |
| 21 |                  |    | future use in ancillary studies, if applicable                           |    |
| 22 |                  |    |                                                                          |    |

---

\*It is strongly recommended that this checklist be read in conjunction with the SPIRIT 2013 Explanation & Elaboration for important clarification on the items. Amendments to the protocol should be tracked and dated. The SPIRIT checklist is copyrighted by the SPIRIT Group under the Creative Commons "[Attribution-NonCommercial-NoDerivs 3.0 Unported](https://creativecommons.org/licenses/by-nc-nd/3.0/)" license.
